# Supplementary material for: A computational insight into a metal mediated pathway for the ring-opening polymerization (ROP) of lactides by an ionic {(NHC)2Ag}+X− (X = halide) type N-heterocyclic carbene (NHC) complex
Source: Royal Society of Chemistry journal article supplement (doi:10.1039/c1dt10345h), 2011-01-01
Supplement: c1dt10345h.pdf [file c1dt10345h.pdf]

## Supporting Information

### **A Computational Insight into a Metal Mediated Pathway for the Ring-Opening Polymerization (ROP) of Lactides by an Ionic $\{(\text{NHC})_2\text{Ag}\}^+\text{X}^-$ ( $\text{X} = \text{halide}$ ) Type N-heterocyclic Carbene (NHC) Complex**

Raji Stephen, Raghavan B. Sunoj\* and Prasenjit Ghosh\*

Department of Chemistry  
Indian Institute of Technology Bombay,  
Powai, Mumbai 400 076.

Email: [pghosh@chem.iitb.ac.in](mailto:pghosh@chem.iitb.ac.in), [sunoj@chem.iitb.ac.in](mailto:sunoj@chem.iitb.ac.in)

Fax: +91-22-2572-3480

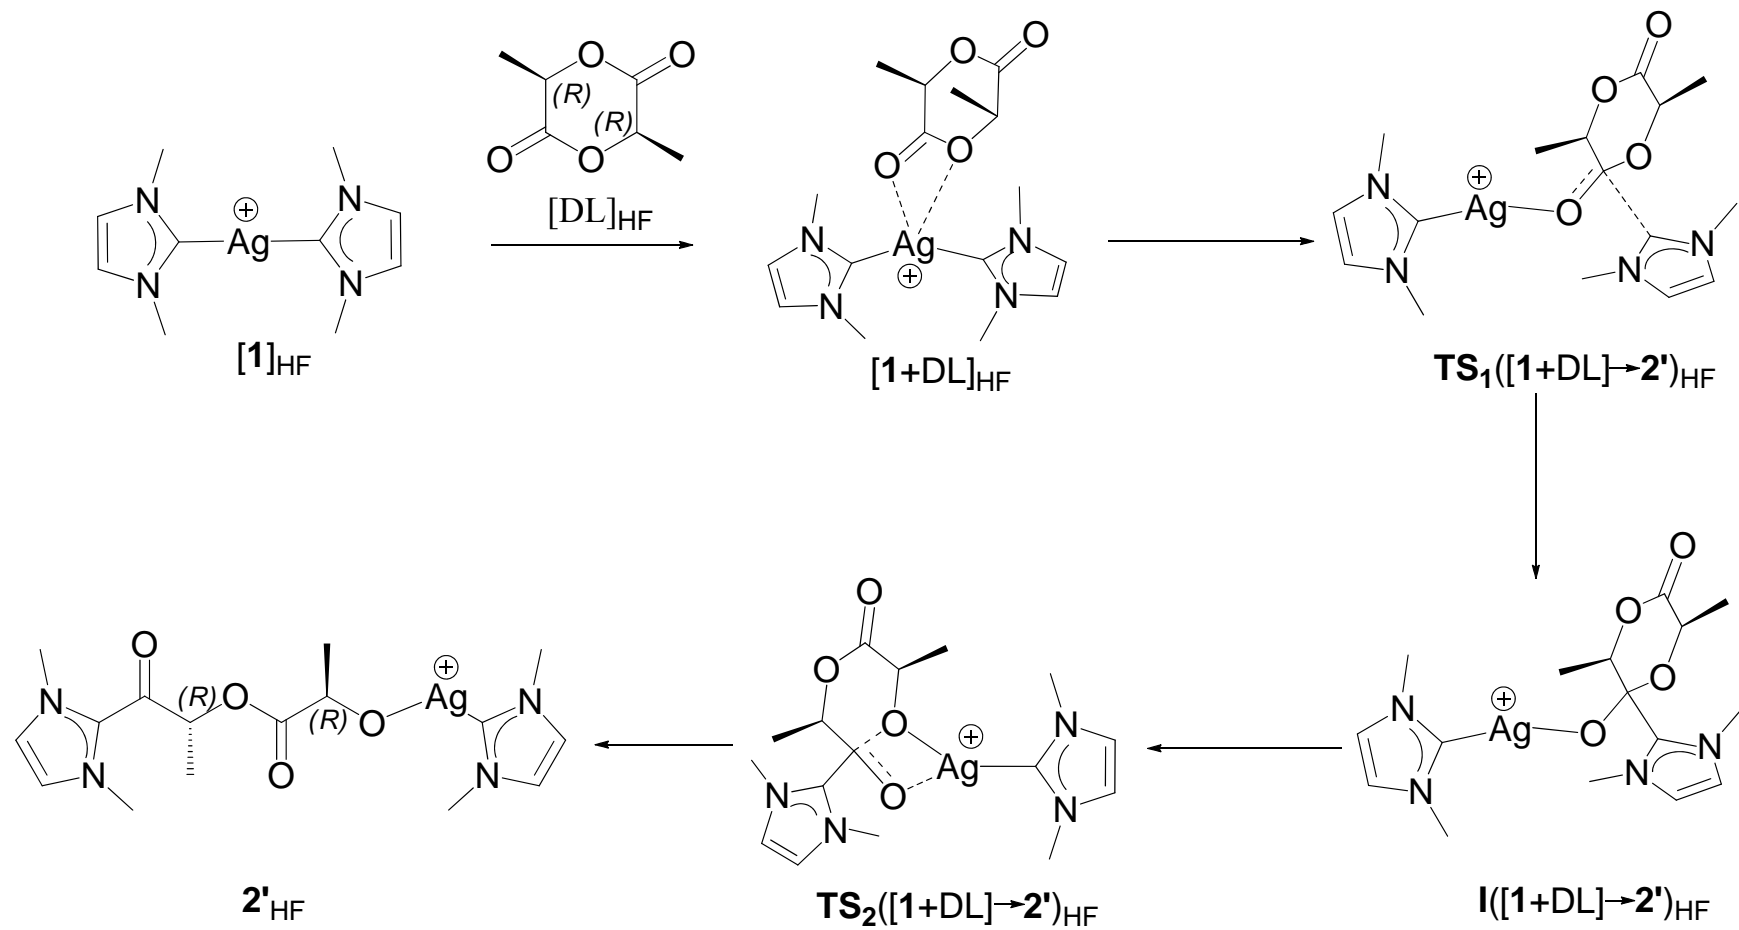

**Scheme S1.** (initiation step for ROP of D-Lactide)

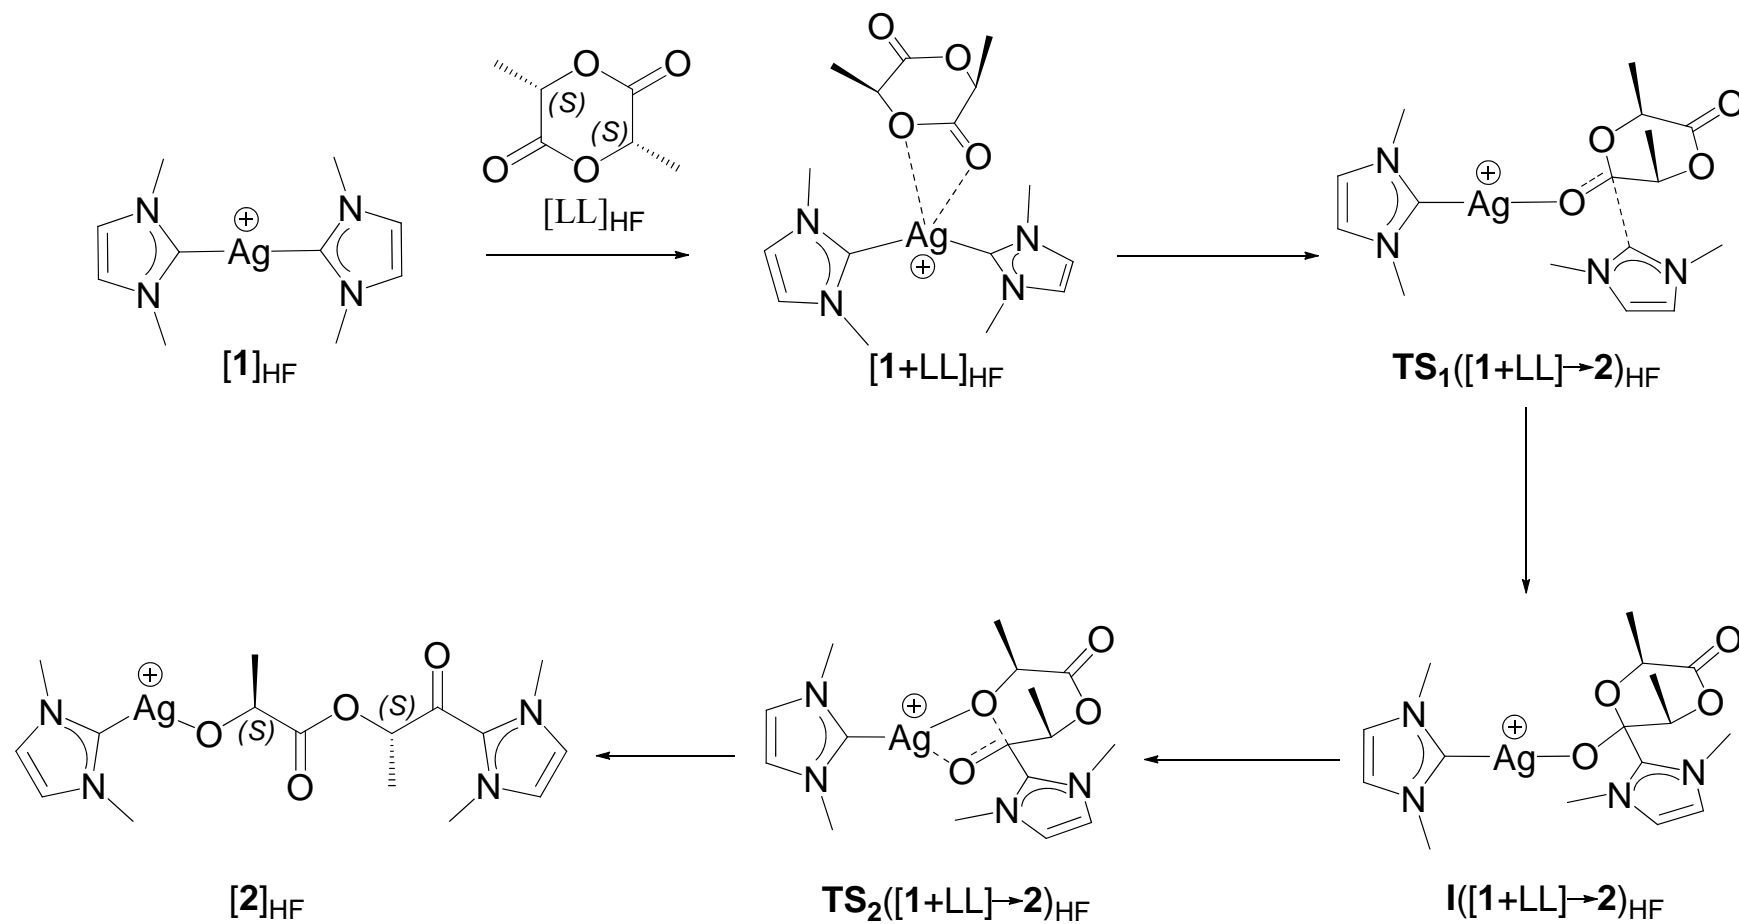

**Scheme S2.** (initiation step for ROP of L-Lactide)

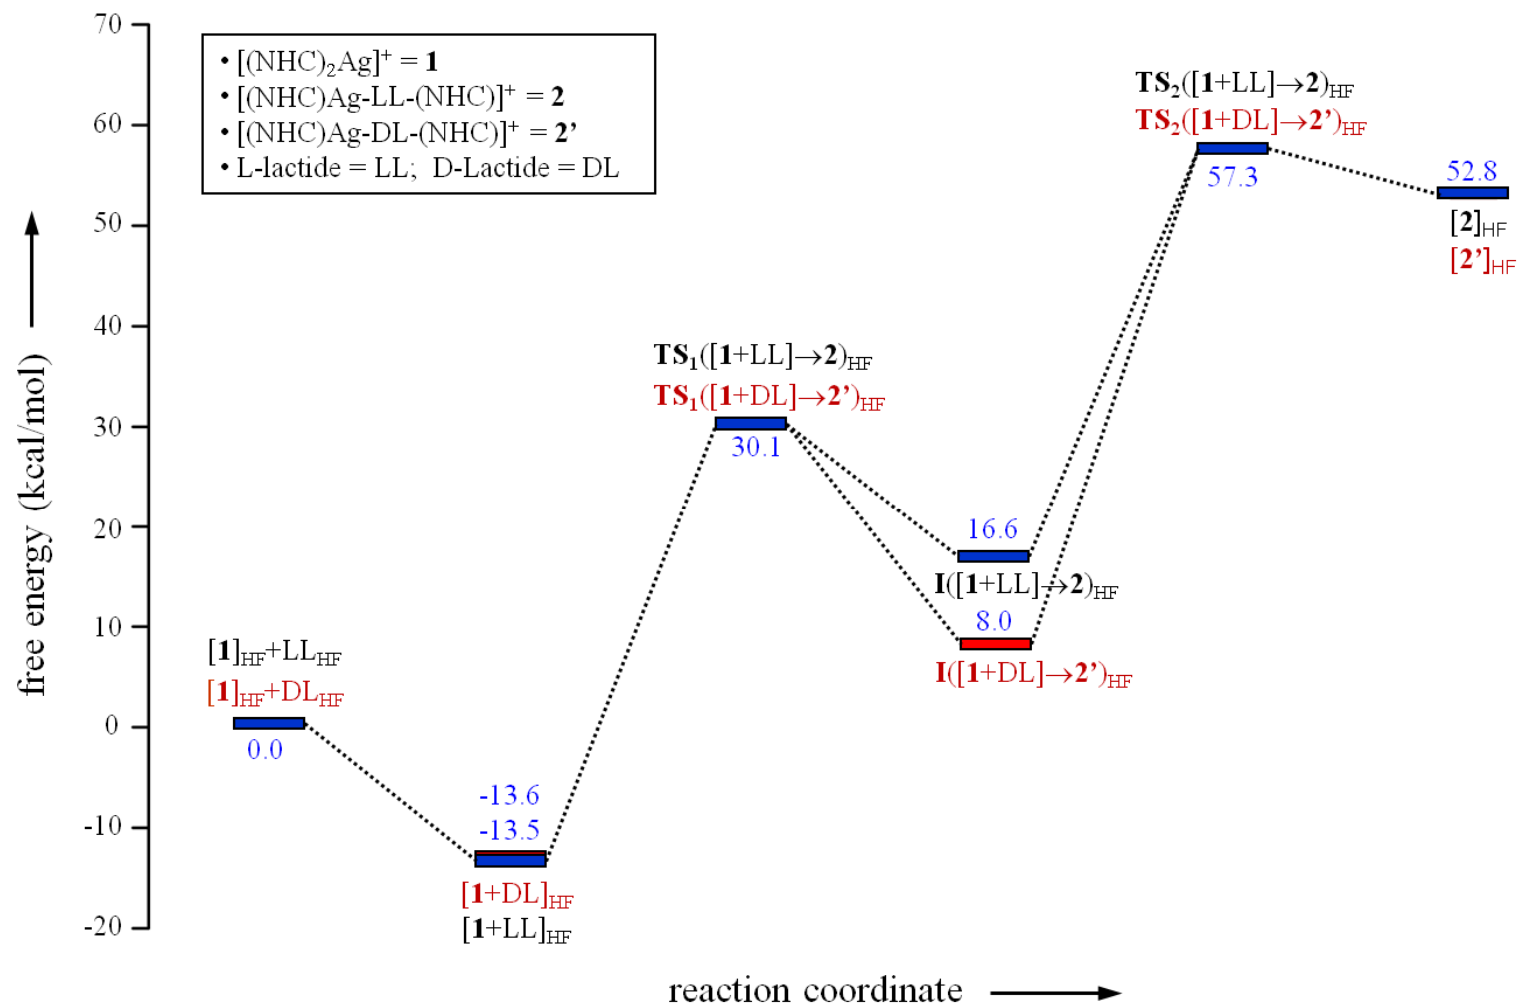

**Figure S1.** Free energy profile for the first ring-opening polymerization (ROP) of D- and L-lactide by **1** (computed at HF/STO3G, LANL1MB).

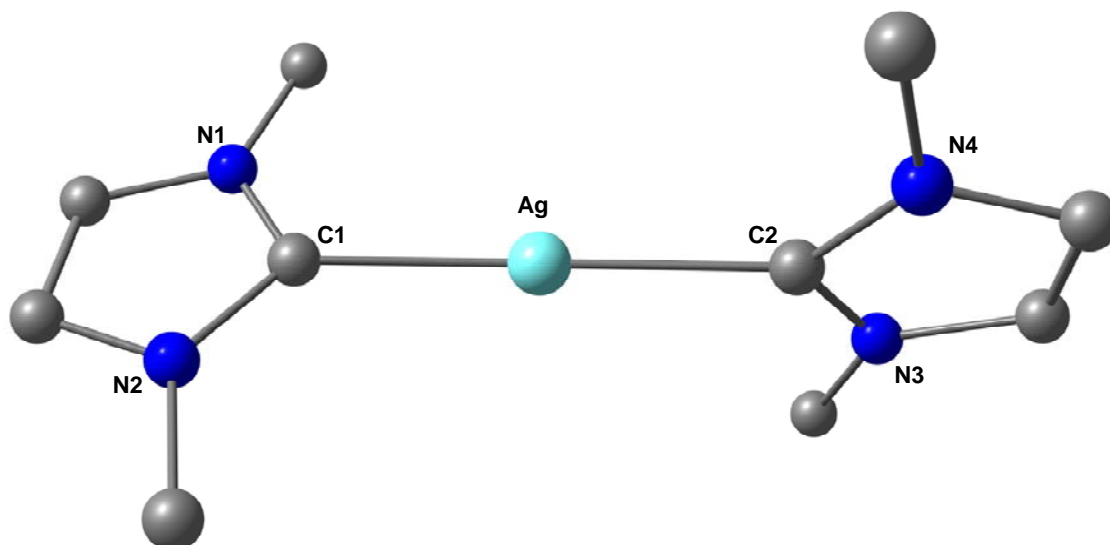

**Figure S2.** Computed structure of [1]<sub>HF</sub>. Selected bond lengths (Å) and angles (°): Ag-C1 2.209, Ag-C2 2.209, C1-Ag-C2 180.0.

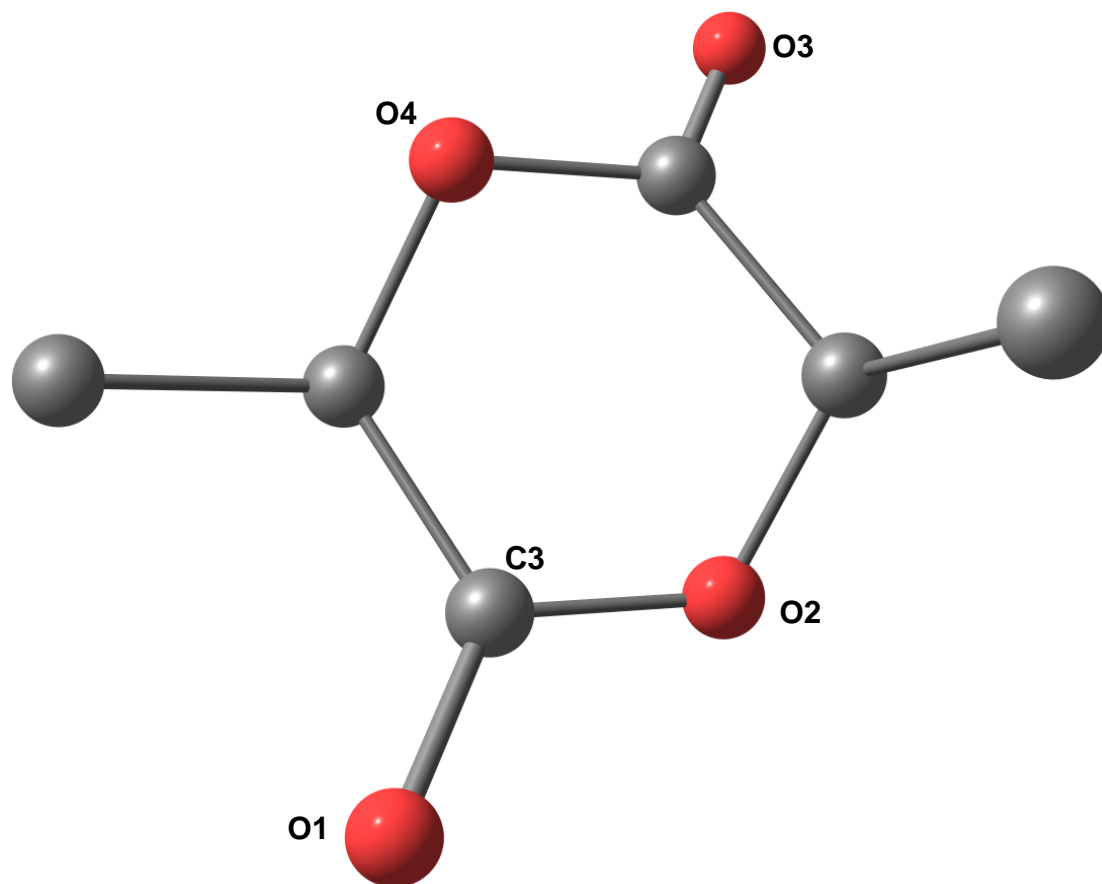

**Figure S3.** Computed structure of  $DL_{HF}$ . Selected bond lengths (Å) and angles ( $^{\circ}$ ): O1-C3 1.213, O2-C3 1.406, O1-C3-O2 119.9.

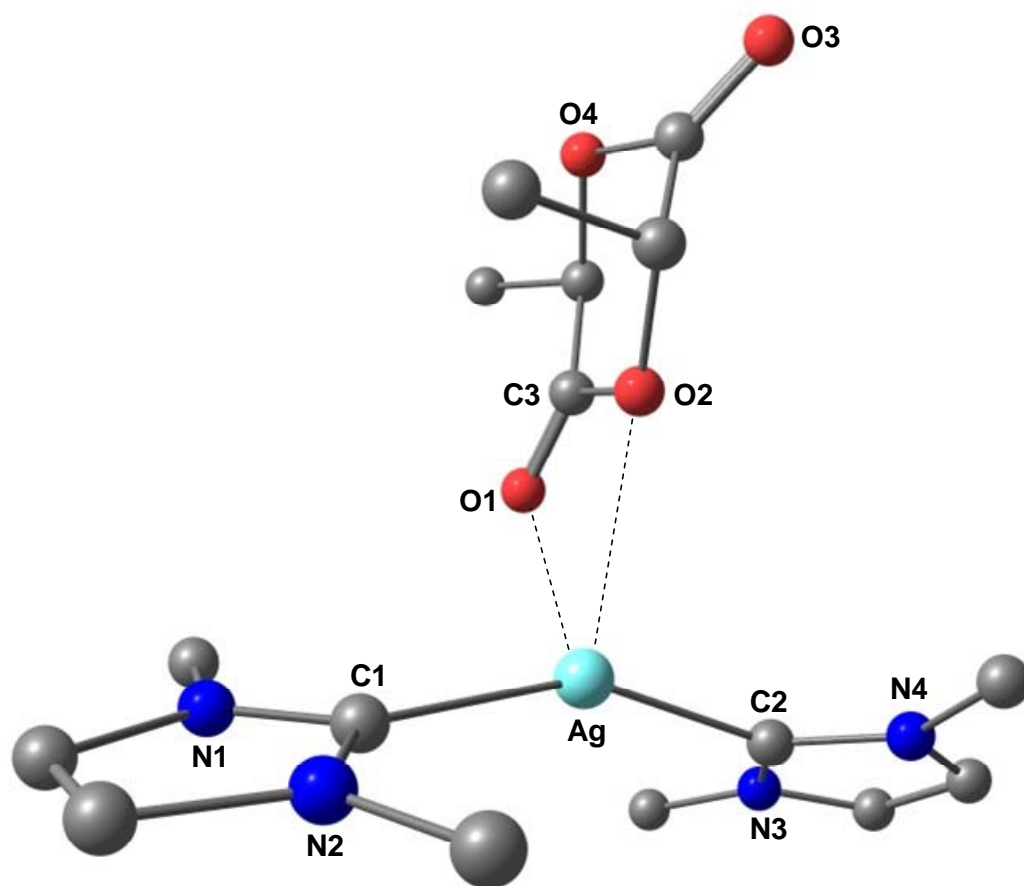

**Figure S4.** Computed structure of  $[1+DL]_{HF}$ . Selected bond lengths ( $\text{\AA}$ ) and angles ( $^\circ$ ):  
Ag-C1 2.270, Ag-C2 2.275, Ag $\cdots$ O1 2.627, Ag $\cdots$ O2 2.715, O1-C3 1.218, C3-O2 1.394,  
C1-Ag-C2 154.22.

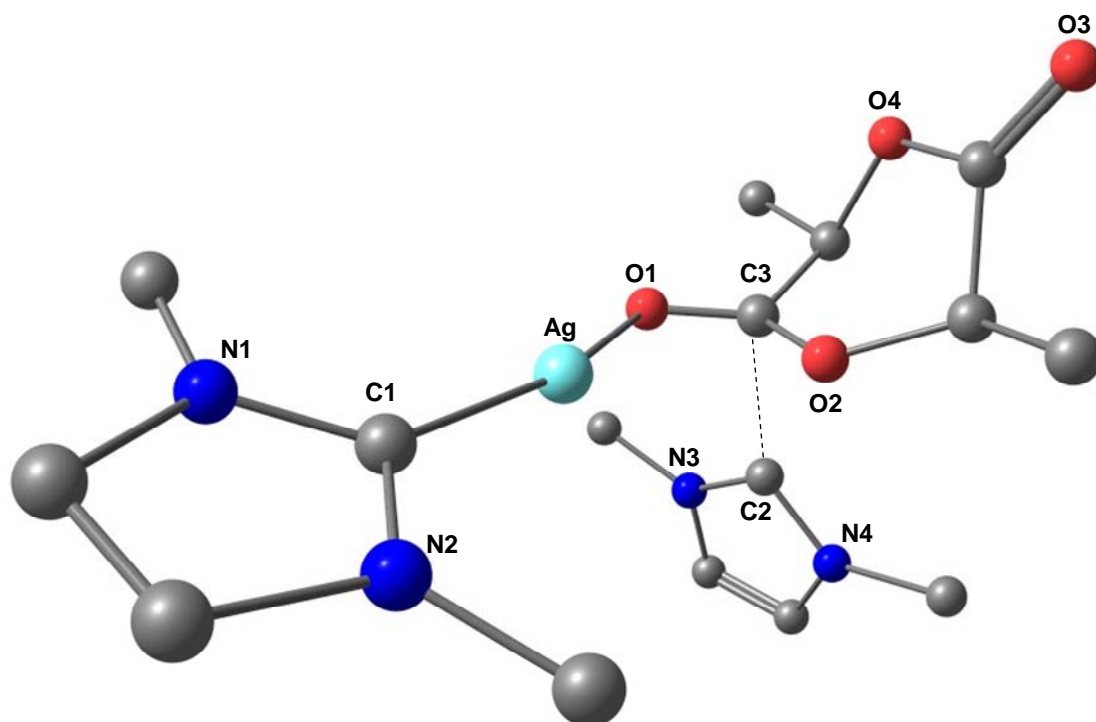

**Figure S5.** Computed structure of  $\text{TS}_1([\mathbf{1}+\text{DL}]\rightarrow\mathbf{2}')_{\text{HF}}$ . Selected bond lengths ( $\text{\AA}$ ) and angles ( $^\circ$ ): Ag-C1 2.217, Ag $\cdots$ C2 4.074, Ag-O1 2.168, Ag $\cdots$ O2 2.668, O1-C3 1.245, C3-O2 1.398, C2 $\cdots$ C3 2.313, C1-Ag-O1 167.28, Ag-O1-C3 110.08, C1-Ag-O1-C3 167.60, Ag-O1-C3-O2 -1.43.

Calculated imaginary frequency along the bond C2 $\cdots$ C3 is i167.



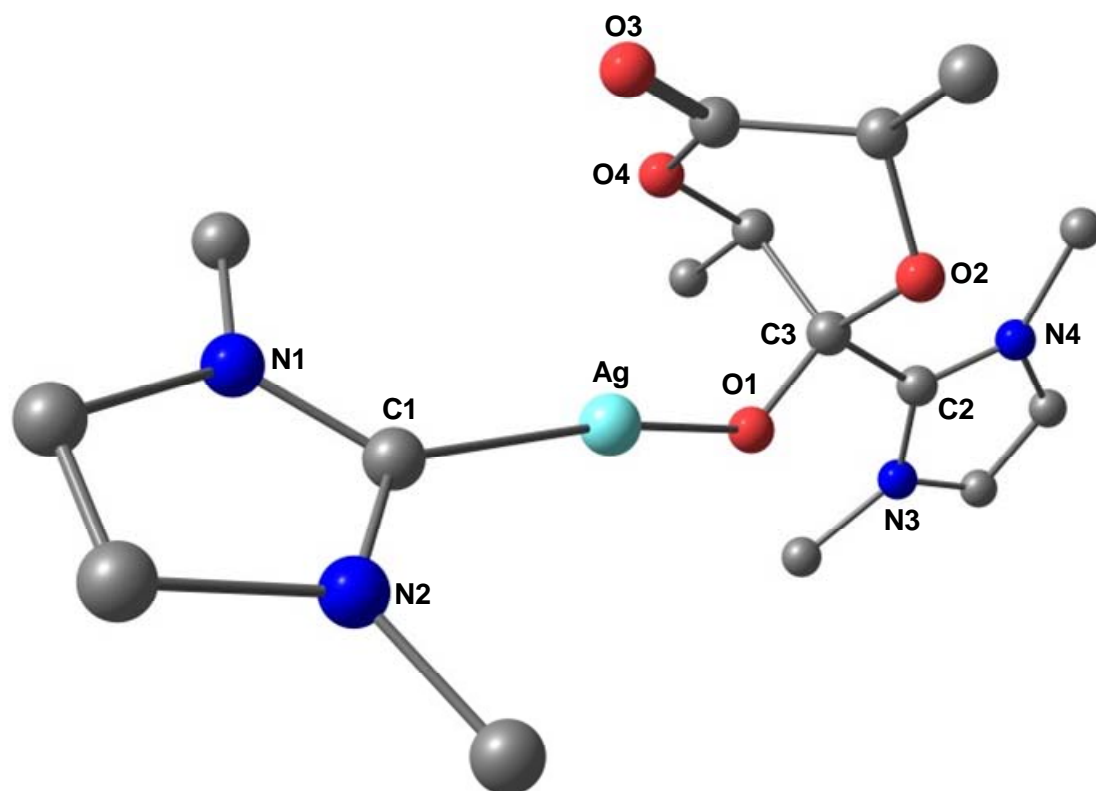

**Figure S6.** Computed structure of  $I([1+DL] \rightarrow 2')_{HF}$ . Selected bond lengths (Å) and angles (°): Ag-C1 2.208, Ag-O1 2.052, O1-C3 1.363, C3-O2 1.456, C2-C3 1.603, C1-Ag-O1 171.43, Ag-O1-C3 123.67, O1-C3-C2 109.24, C1-Ag-O1-C3 -175.56, Ag-O1-C3-O2 51.39, Ag-O1-C3-C2 165.72.

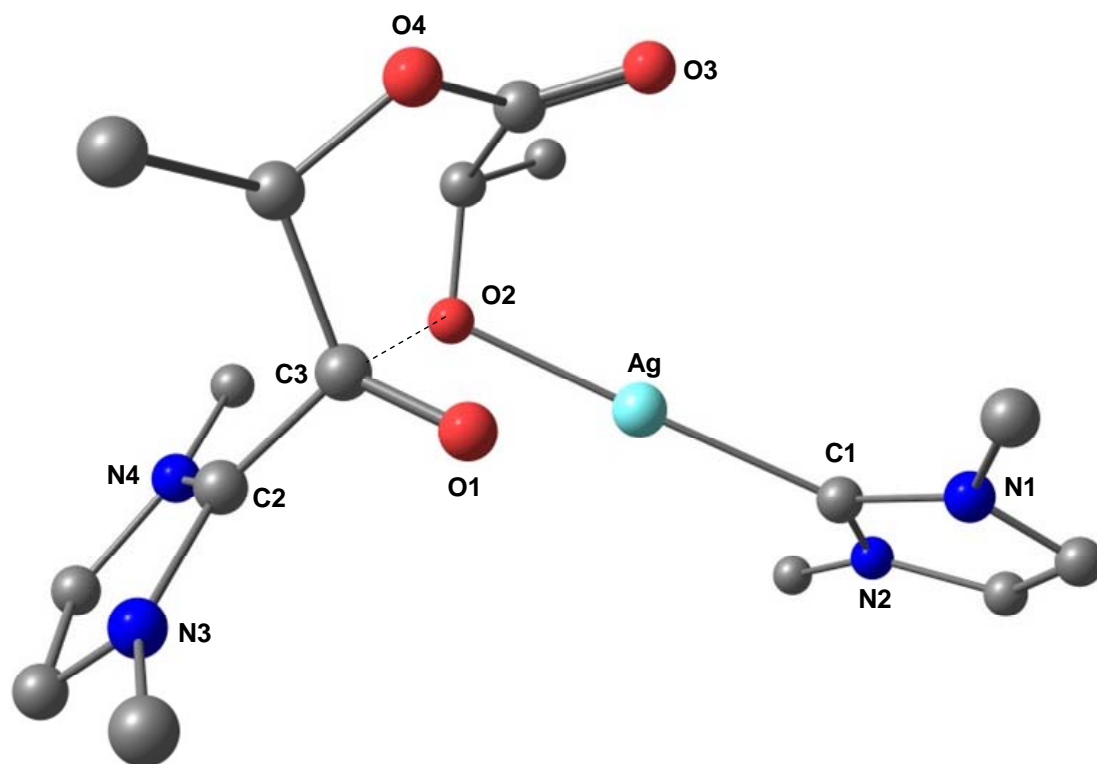

**Figure S7.** Computed structure of  $\text{TS}_2([\mathbf{1}+\text{DL}]\rightarrow\mathbf{2}')_{\text{HF}}$ . Selected bond lengths (Å) and angles (°): Ag-C1 2.228, Ag $\cdots$ O1 2.690, Ag-O2 2.137, O1-C3 1.227, C3 $\cdots$ O2 2.161, C2-C3 1.567, C1-Ag-O2 177.03, O1-C3-C2 117.54.

Calculated imaginary frequency along the bond C3 $\cdots$ O2 is i227.

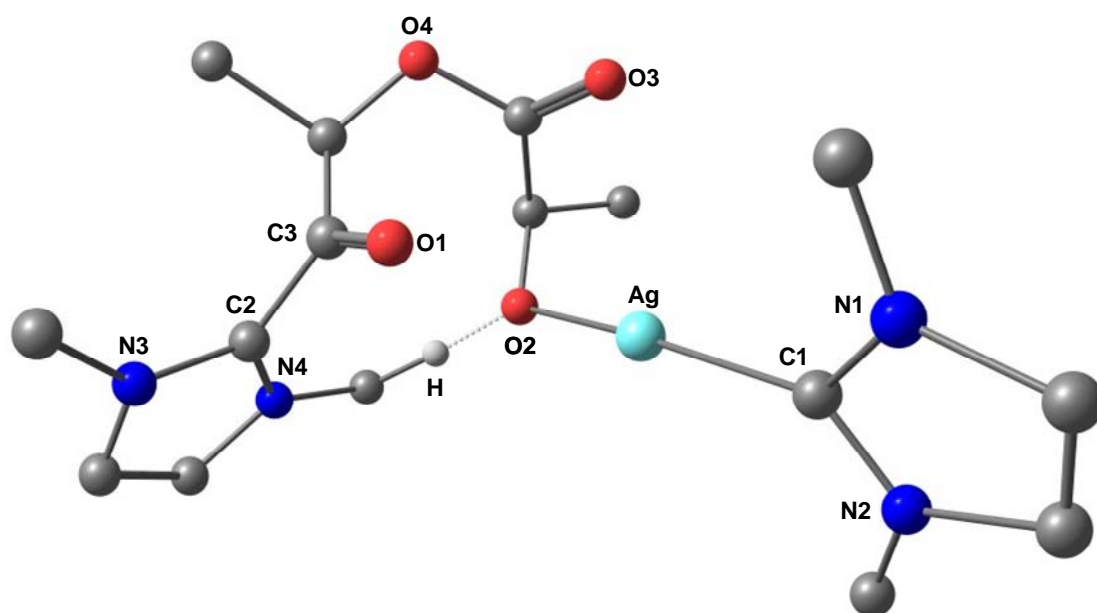

**Figure S8.** Computed structure of  $2'_{\text{HF}}$ . Selected bond lengths ( $\text{\AA}$ ) and angles ( $^\circ$ ): Ag-C1 2.221, Ag $\cdots$ O1 3.013, Ag-O2 2.091, O1-C3 1.218, C3 $\cdots$ O2 2.792, C2-C3 1.549, O2-H 1.395, C1-Ag-O2 175.27, O1-C3-C2 119.22.

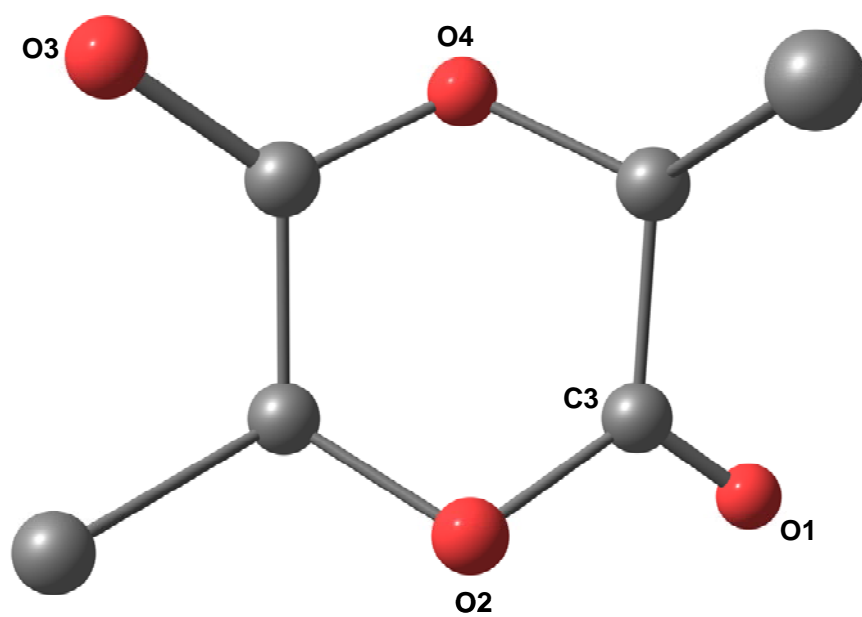

**Figure S9.** Computed structure of  $LL_{HF}$ . Selected bond lengths ( $\text{\AA}$ ) and angles ( $^\circ$ ): O1-C3 1.213, O2-C3 1.406, O1-C3-O2 120.2.

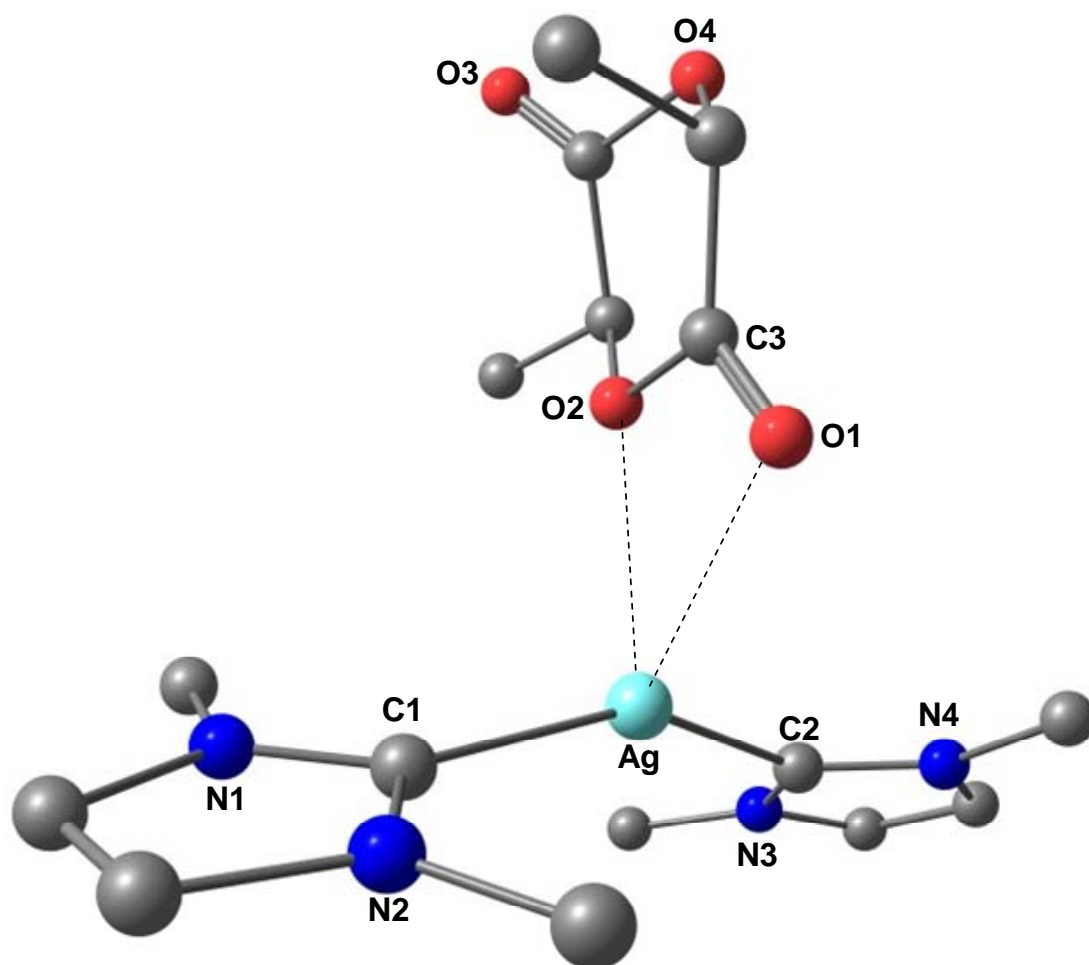

**Figure S10.** Computed structure of  $[1+LL]_{HF}$ . Selected bond lengths (Å) and angles (°):  
Ag-C1 2.274, Ag-C2 2.271, Ag...O1 2.647, Ag...O2 2.687, O1-C3 1.217, C3-O2 1.395,  
C1-Ag-C2 154.29.

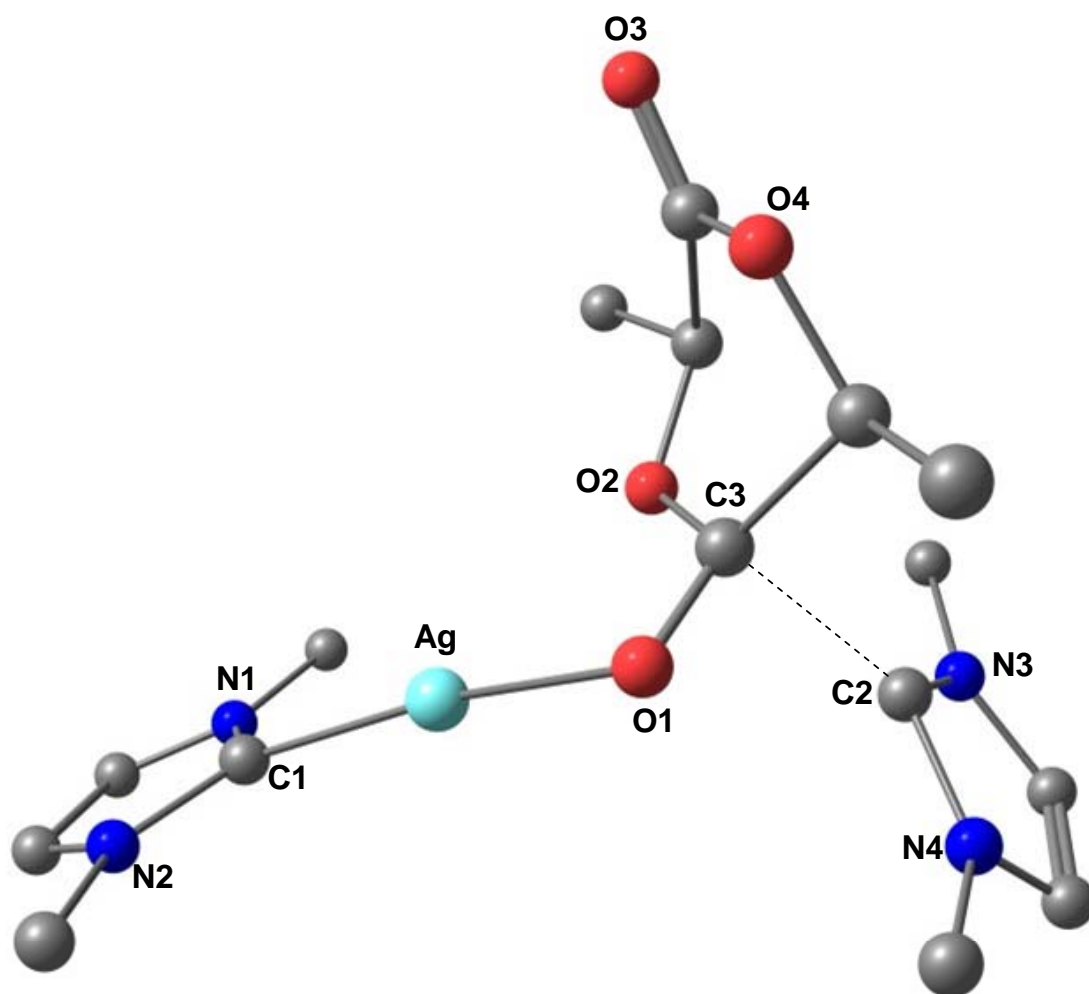

**Figure S11.** Computed structure of  $\text{TS}_1([\mathbf{1}+\text{LL}] \rightarrow \mathbf{2})_{\text{HF}}$ . Selected bond lengths ( $\text{\AA}$ ) and angles ( $^\circ$ ): Ag-C1 2.217, Ag-O1 2.168, Ag $\cdots$ O2 2.668, O1-C3 1.225, C3-O2 1.398, C2 $\cdots$ C3 2.313, C1-Ag-O1 138.92, Ag-O1-C3 110.07, C1-Ag-O1-C3 -167.59, Ag-O1-C3-O2 1.423.

Calculated imaginary frequency along the bond C2 $\cdots$ C3 is i167.

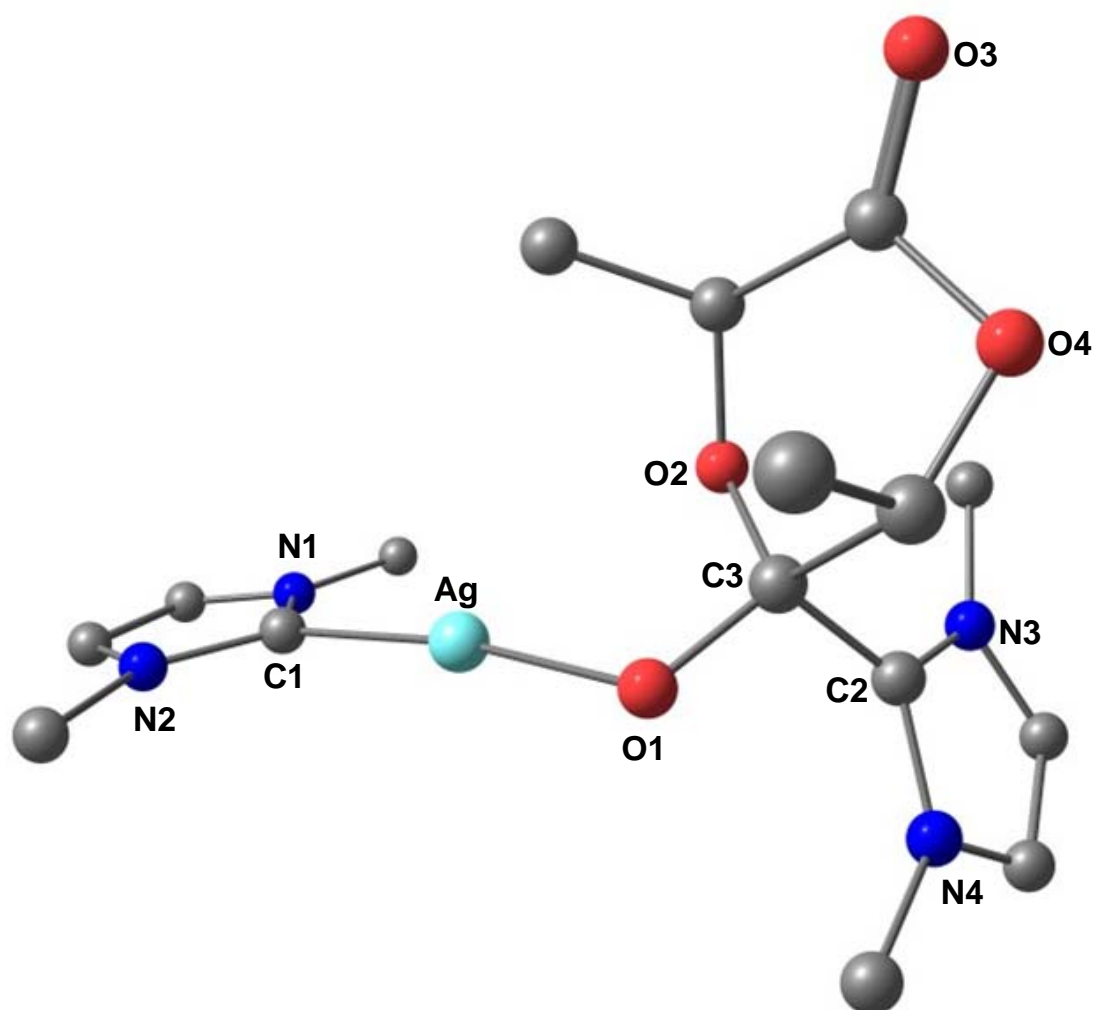

**Figure S12.** Computed structure of  $\mathbf{I}([1+LL] \rightarrow 2)_{\text{HF}}$ . Selected bond lengths ( $\text{\AA}$ ) and angles ( $^\circ$ ): Ag-C1 2.213, Ag-O1 2.051, Ag $\cdots$ O2 2.862, O1-C3 1.361, C3-O2 1.449, C2-C3 1.608, C1-Ag-O1 170.20, Ag-O1-C3 117.43, O1-C3-C2 108.78, C1-Ag-O1-C3 -175.29, Ag-O1-C3-O2 6.67, Ag-O1-C3-C2 -106.12.

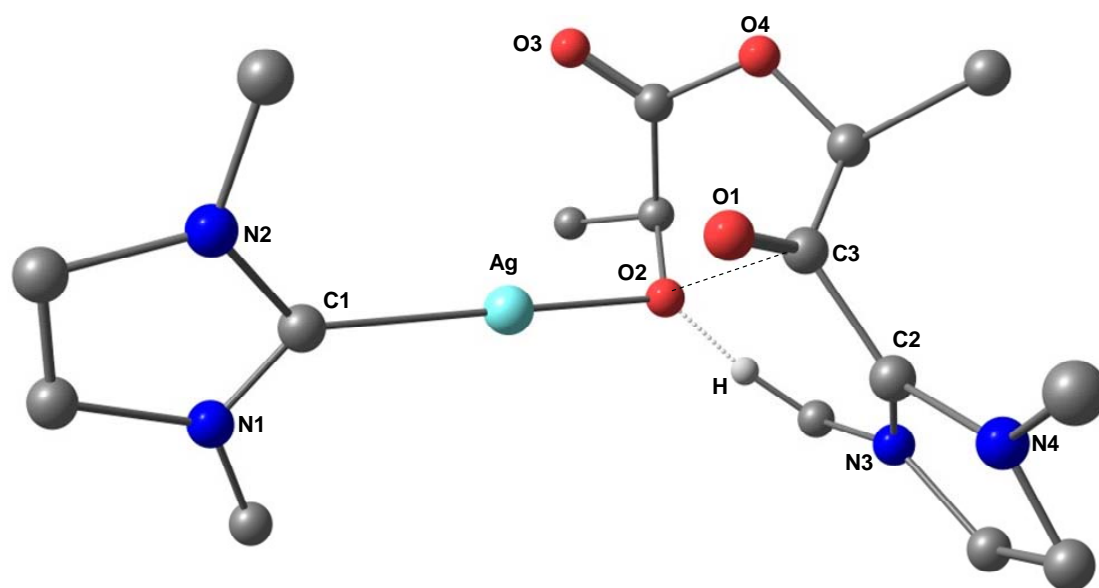

**Figure S13.** Computed structure of  $\text{TS}_2([\mathbf{1}+\text{LL}]\rightarrow\mathbf{2})_{\text{HF}}$ . Selected bond lengths (Å) and angles (°): Ag-C1 2.228, Ag $\cdots$ O1 2.690, Ag-O2 2.137, O1-C3 1.227, C3 $\cdots$ O2 2.162, C2-C3 1.567, C1-Ag-O2 177.03, O1-C3-C2 117.54.

Calculated imaginary frequency along the bond C3 $\cdots$ O2 is i227.



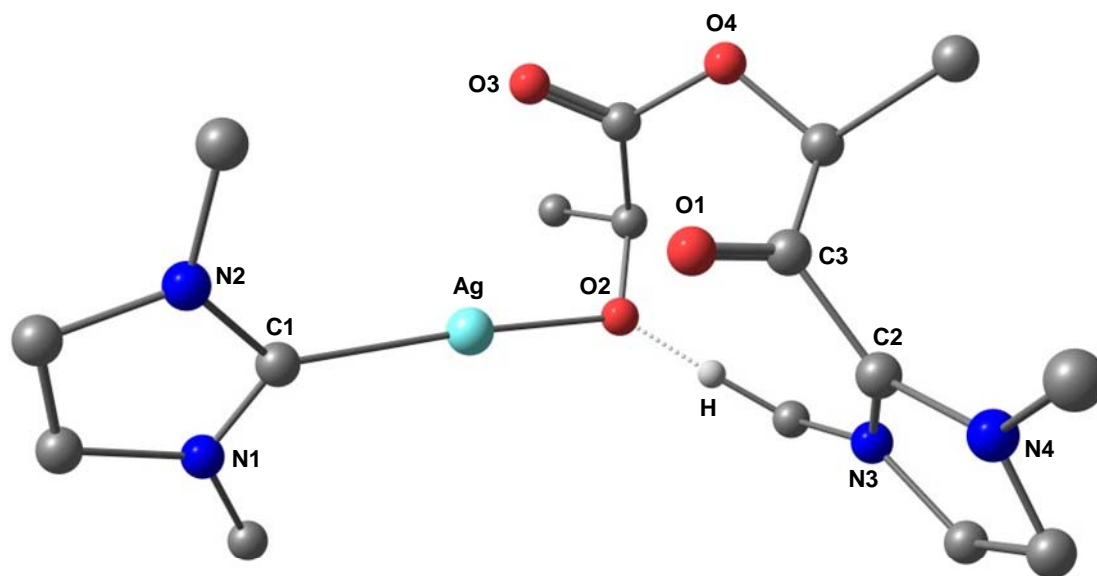

**Figure S14.** Computed structure of  $2_{HF}$ . Selected bond lengths (Å) and angles (°): Ag-C1 2.221, Ag $\cdots$ O1 3.013, Ag-O2 2.091, O1-C3 1.218, C3 $\cdots$ O2 2.792, C2-C3 1.549, O2-H 1.395, C1-Ag-O2 175.27, O1-C3-C2 119.22.

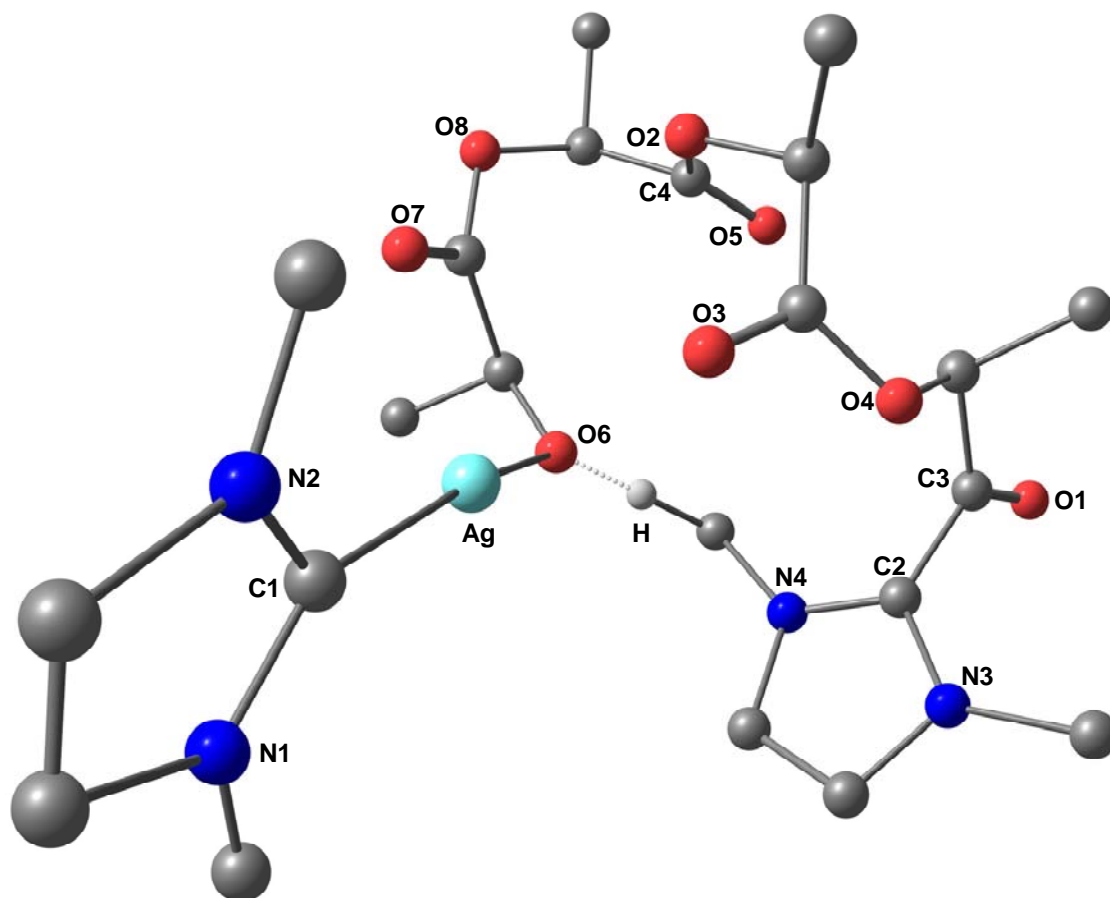

**Figure S15.** Computed structure of  $3_{\text{HF}}$ . Selected bond lengths (Å) and angles (°): Ag-C1 2.250, Ag-O6 2.121, O1-C3 1.216, C2-C3 1.546, O6...H 1.307, O2-C4 1.396, C4-O5 1.216, C1-Ag-O6 168.1, O1-C3-C2 120.3, O2-C4-O5 123.2.

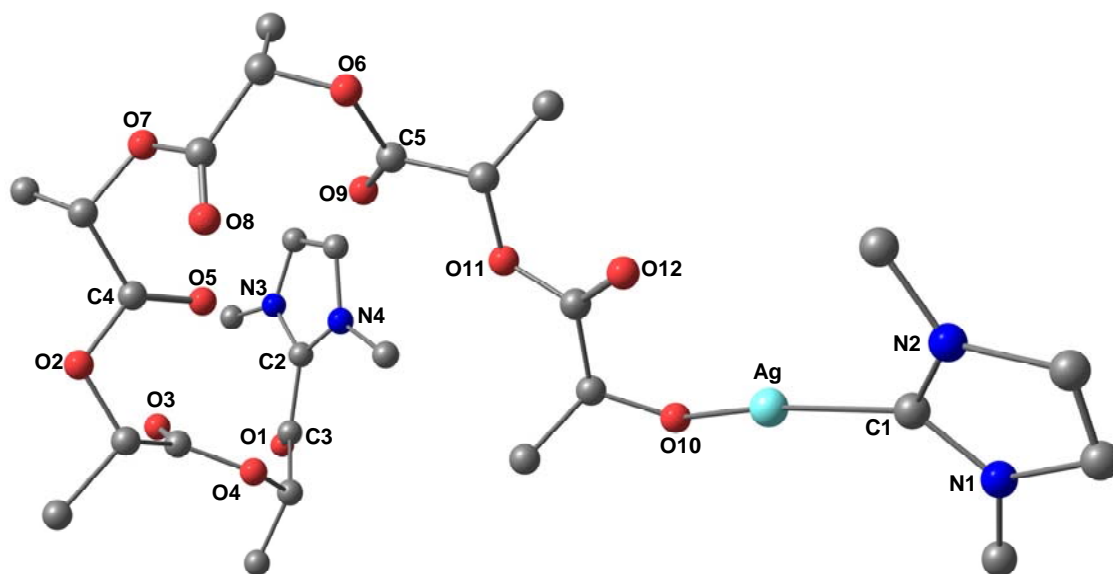

**Figure S16.** Computed structure of  $4_{\text{HF}}$ . Selected bond lengths ( $\text{\AA}$ ) and angles ( $^\circ$ ): Ag-C1 2.209, Ag-O10 1.995, O1-C3 1.219, C2-C3 1.544, O2-C4 1.394, C4-O5 1.216, C5-O6 1.389, C5-O9 1.217, C1-Ag-O10 168.9, O1-C3-C2 117.3, O2-C4-O5 122.8, O6-C5-O9 123.8.

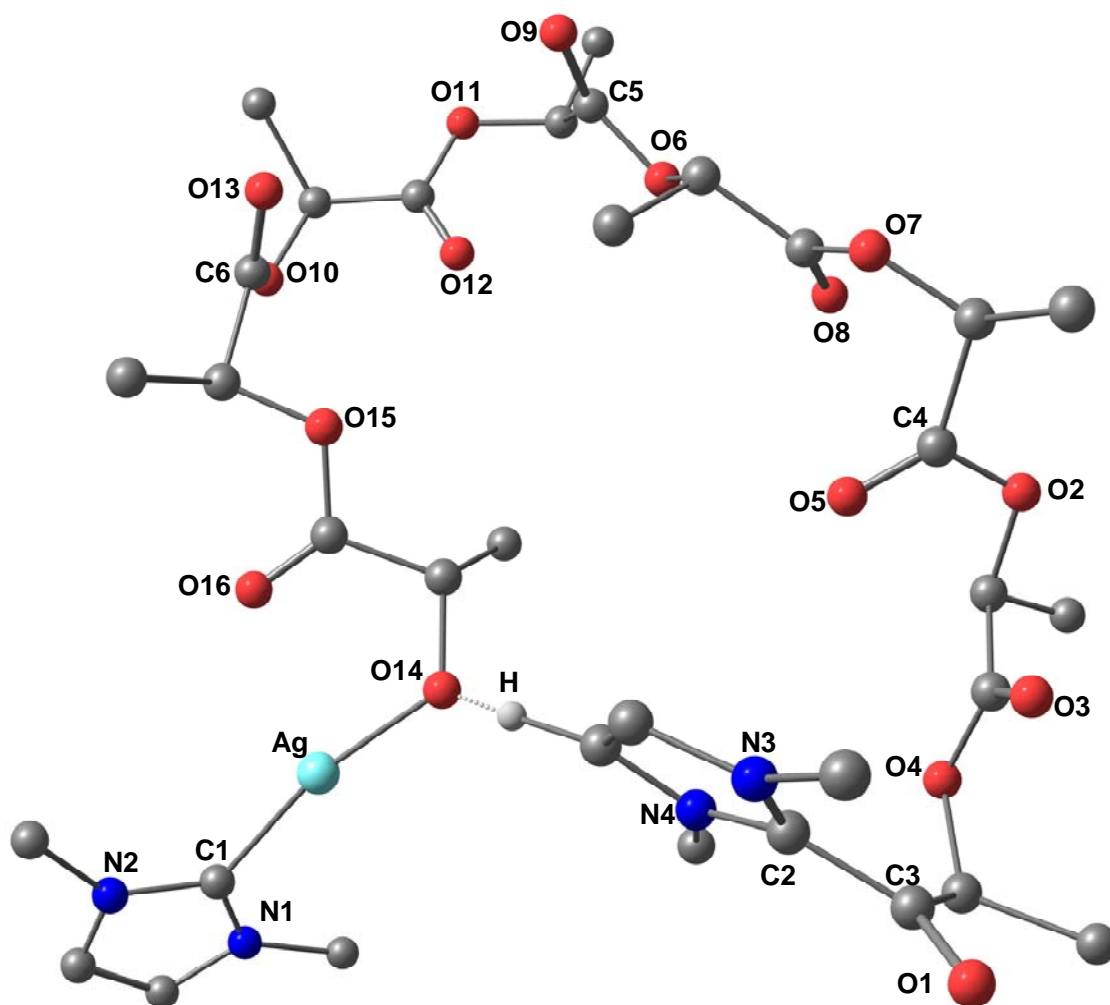

**Figure S17.** Computed structure of  $5_{\text{HF}}$ . Selected bond lengths (Å) and angles (°): Ag-C1 2.232, Ag-O14 2.120, O1-C3 1.220, C2-C3 1.534, O2-C4 1.395, C4-O5 1.215, C5-O6 1.394, C5-O9 1.214, C6-O10 1.394, C6-O13 1.214, O14...H 1.144, C1-Ag-O14 168.2, O1-C3-C2 118.5, O2-C4-O5 123.1, O6-C5-O9 124.0, O10-C6-O13 125.0.

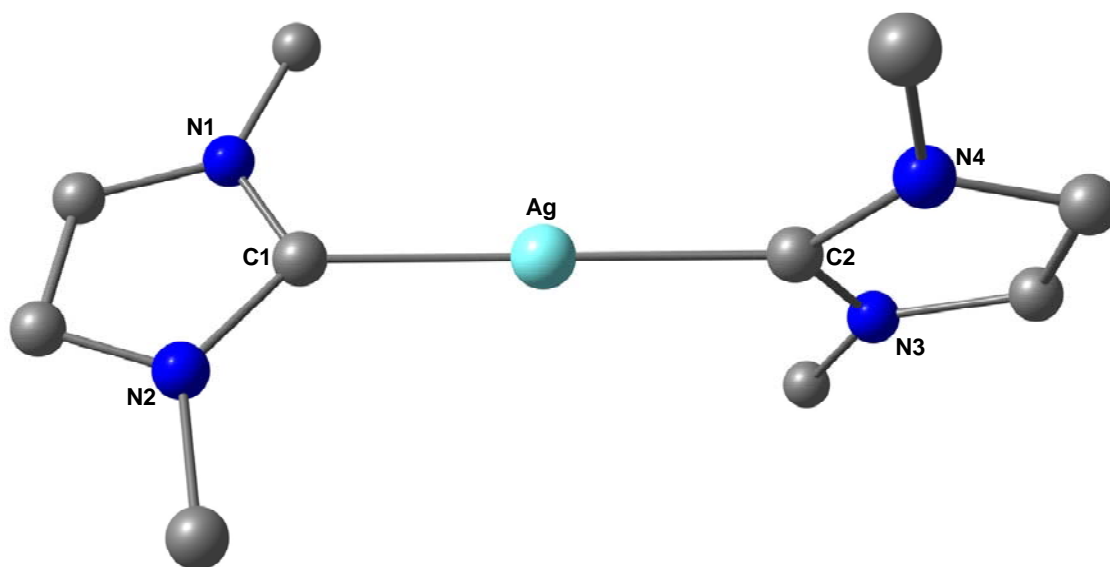

**Figure S18.** Computed structure of **1**. Selected bond lengths (Å) and angles (°): Ag-C1 2.114, Ag-C2 2.114, C1-Ag-C2 180.0.

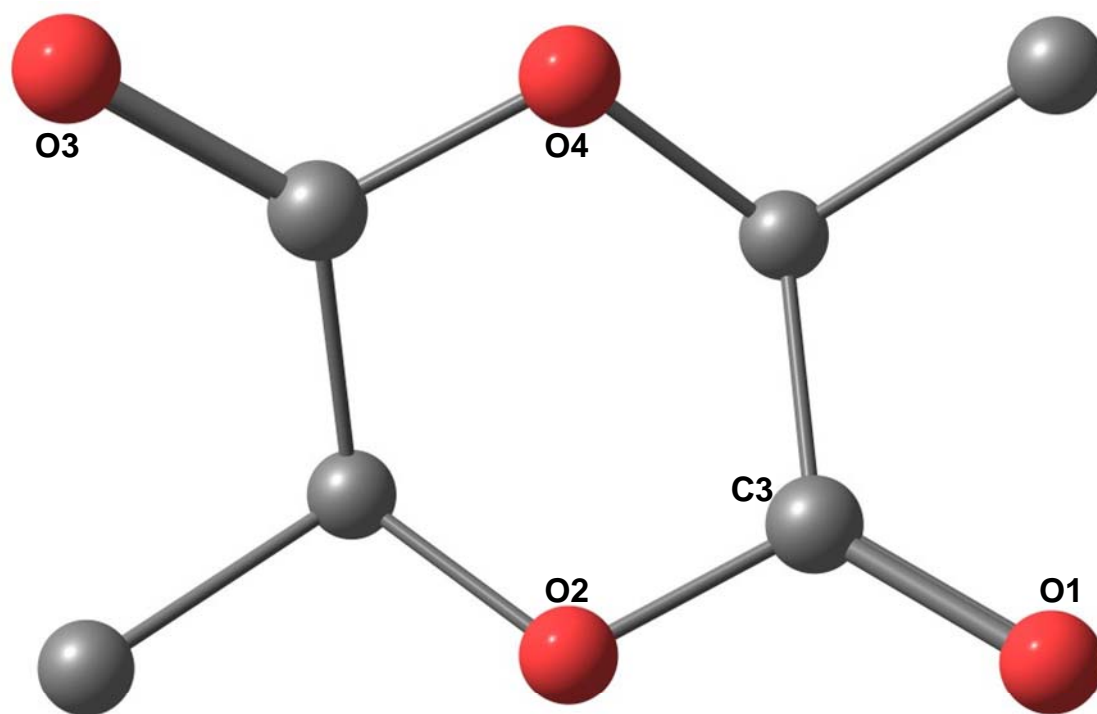

**Figure S19.** Computed structure of LL. Selected bond lengths (Å) and angles (°): O1-C3 1.204, O2-C3 1.354, O1-C3-O2 121.0.

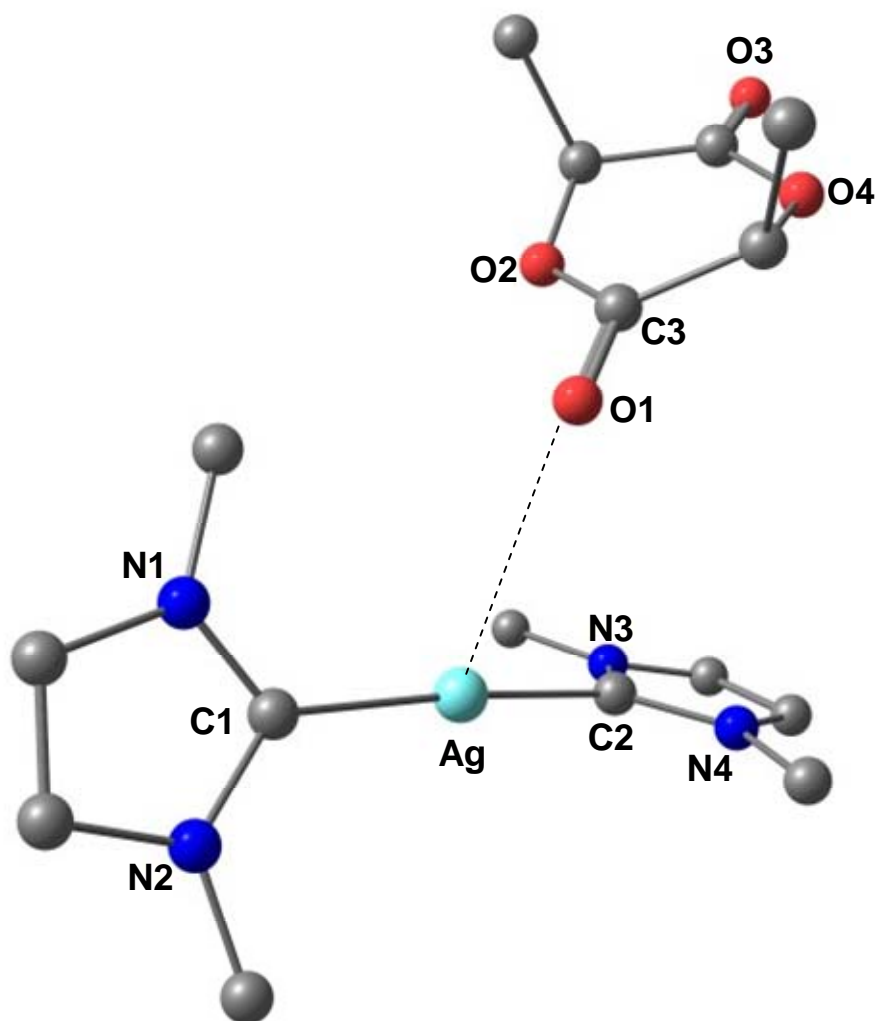

**Figure S20.** Computed structure of [1 +LL]. Selected bond lengths (Å) and angles (°):  
Ag-C1 2.117, Ag-C2 2.119, Ag...O1 3.260, O1-C3 1.215, C3-O2 1.339, C1-Ag-C2  
175.21.

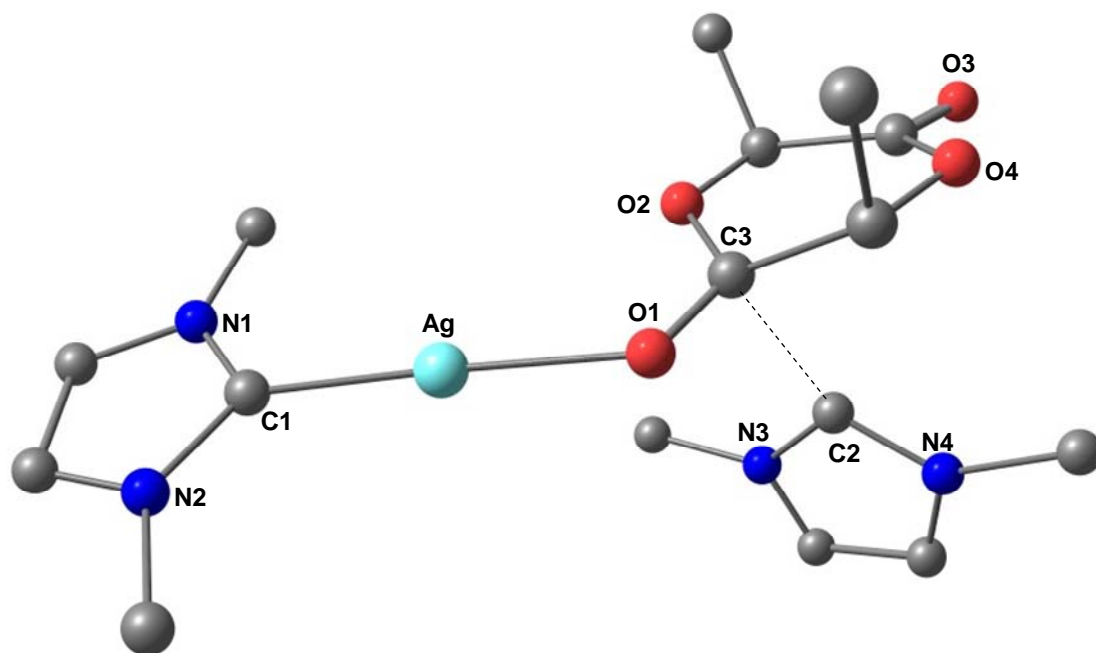

**Figure S21.** Computed structure of  $\text{TS}_1([1+LL]\rightarrow 2)$ . Selected bond lengths (Å) and angles (°): Ag-C1 2.083, Ag-O1 2.128, Ag $\cdots$ O2 3.258, O1-C3 1.249, C3-O2 1.339, C2 $\cdots$ C3 2.480, C1-Ag-O1 175.01, Ag-O1-C3 129.00, C1-Ag-O1-C3 -157.38, Ag-O1-C3-O2 -1.55.

Calculated imaginary frequency along the bond C2 $\cdots$ C3 is i67.



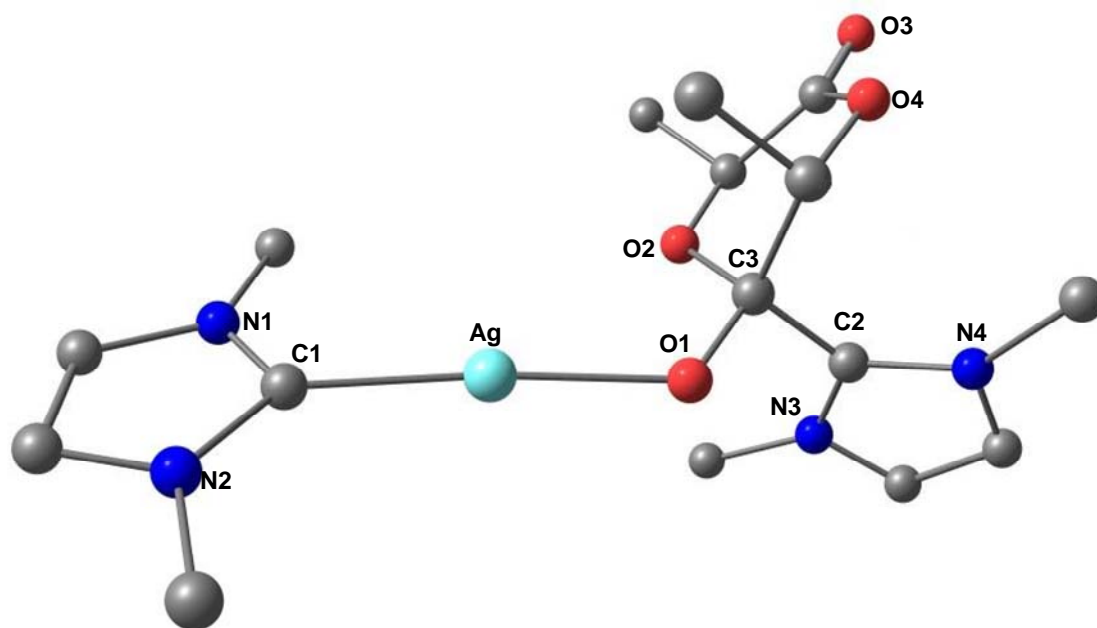

**Figure S22.** Computed structure of **I**([**1**+LL]→**2**). Selected bond lengths (Å) and angles (°): Ag-C1 2.081, Ag-O1 2.089, Ag···O2 3.183, O1-C3 1.333, C3-O2 1.456, C2-C3 1.570, C1-Ag-O1 174.73, Ag-O1-C3 125.73, O1-C3-C2 105.58, C1-Ag-O1-C3 -174.47, Ag-O1-C3-O2 -30.47, Ag-O1-C3-C2 -146.13.

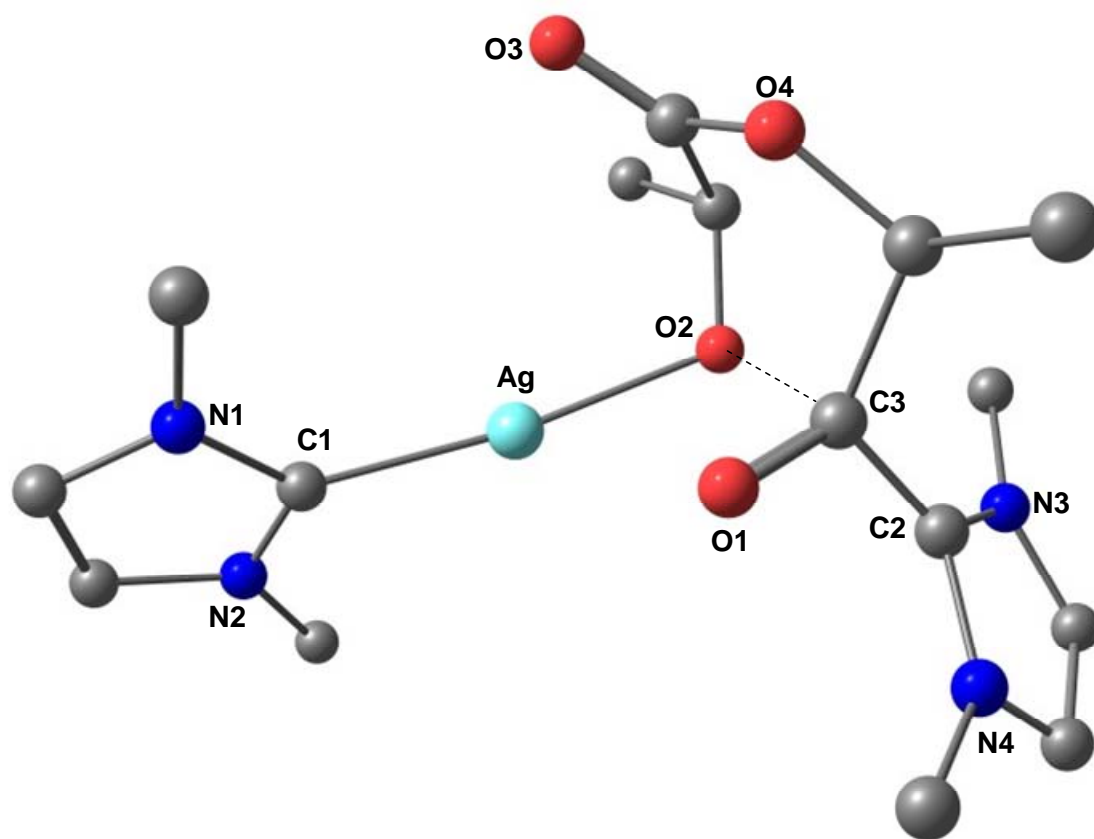

**Figure S23.** Computed structure of  $\text{TS}_2([1+\text{LL}]\rightarrow 2)$ . Selected bond lengths ( $\text{\AA}$ ) and angles ( $^\circ$ ): Ag-C1 2.090, Ag $\cdots$ O1 2.831, Ag-O2 2.165, O1-C3 1.232, C3 $\cdots$ O2 2.092, C2-C3 1.525, C1-Ag-O2 172.94, O1-C3-C2 115.30.

Calculated imaginary frequency along the bond C3 $\cdots$ O2 is i26.

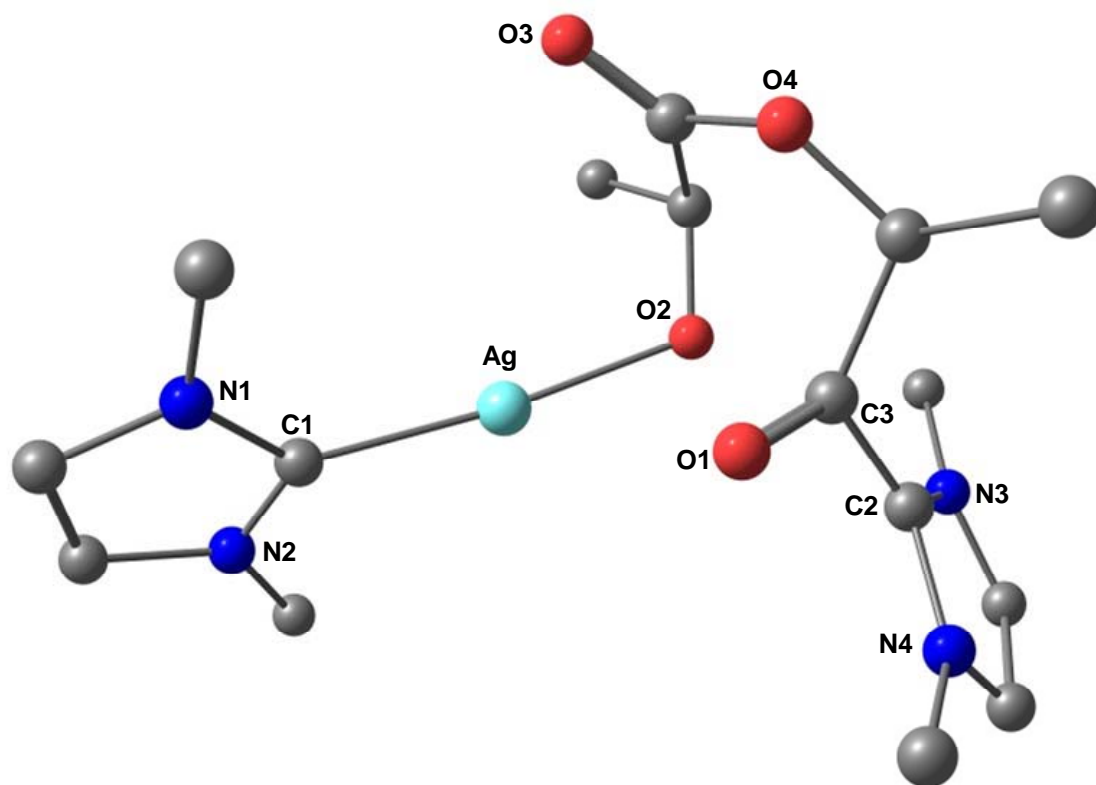

**Figure S24.** Computed structure of **2**. Selected bond lengths (Å) and angles (°): Ag-C1 2.088, Ag···O1 2.928, Ag-O2 2.148, O1-C3 1.227, C3···O2 2.182, C2-C3 1.522, C1-Ag-O2 173.90, O1-C3-C2 115.64.

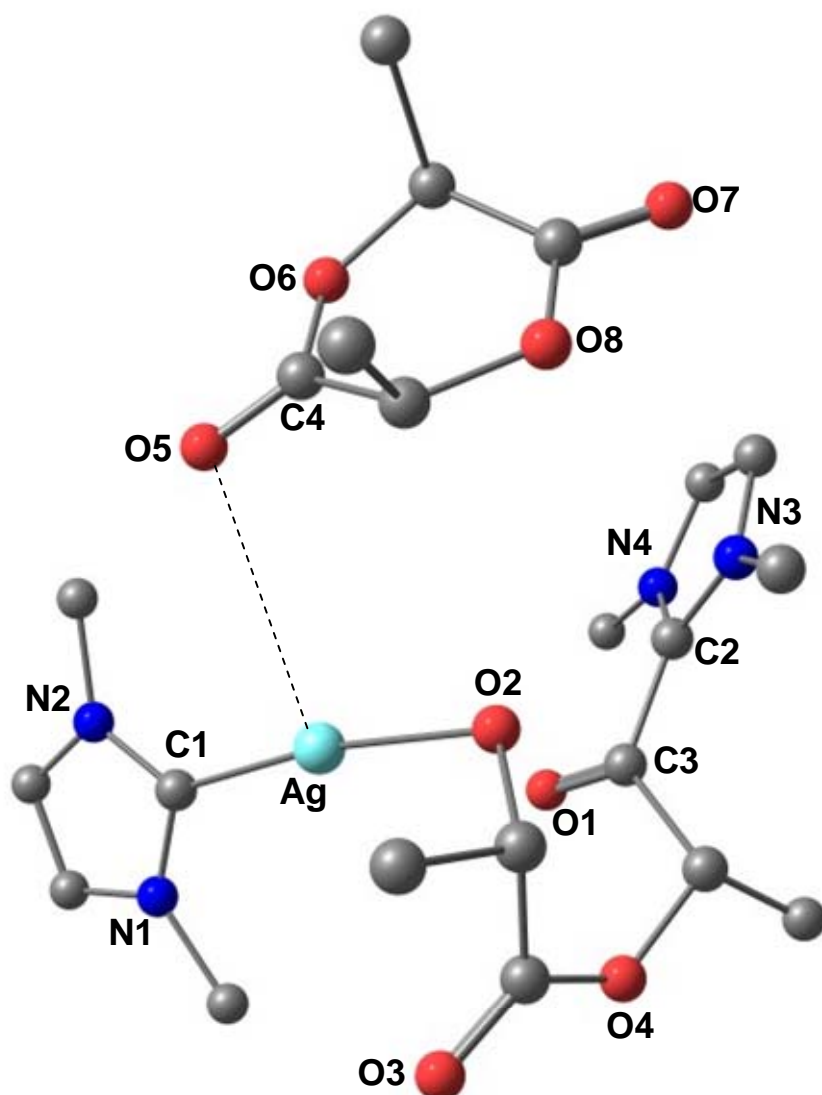

**Figure S25.** Computed structure of [2+LL]. Selected bond lengths (Å) and angles (°):  
Ag-C1 2.094, Ag-O2 2.153, Ag...O1 3.052, O1-C3 1.220, C3...O2 2.451, C2-C3 1.511,  
Ag...O5 3.428, C4-O5 1.210, C4-O6 1.346, C1-Ag-O2 171.78.

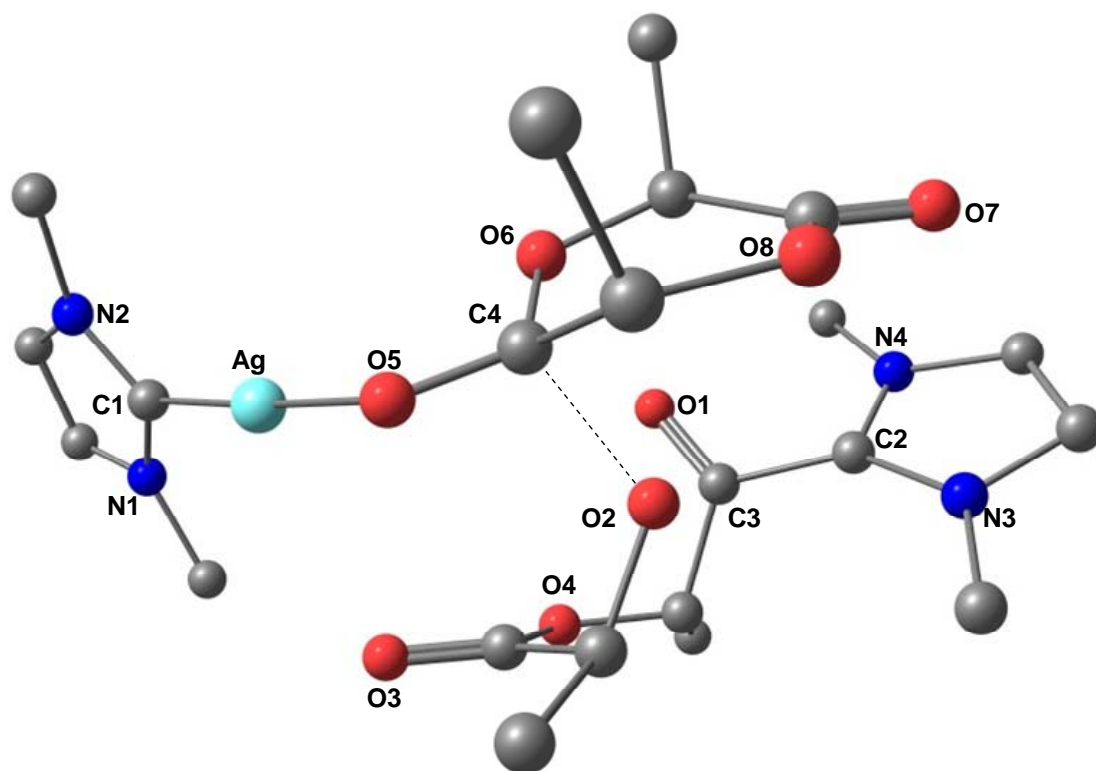

**Figure S26.** Computed structure of  $\text{TS}_1([2+\text{LL}]\rightarrow 3)$ . Selected bond lengths ( $\text{\AA}$ ) and angles ( $^\circ$ ): Ag-C1 2.091, Ag $\cdots$ O3 2.867, Ag-O5 2.144, Ag $\cdots$ O6 3.181, O1-C3 1.216, C3 $\cdots$ O2 2.679, C2-C3 1.515, C4-O5 1.259, C4-O6 1.362, O2 $\cdots$ C4 1.936, C1-Ag-O5 173.68, Ag-O5-C4 125.15, C1-Ag-O5-C4 -128.65, Ag-O5-C4-O6 24.19.

Calculated imaginary frequency along the bond C4 $\cdots$ O2 is i174.

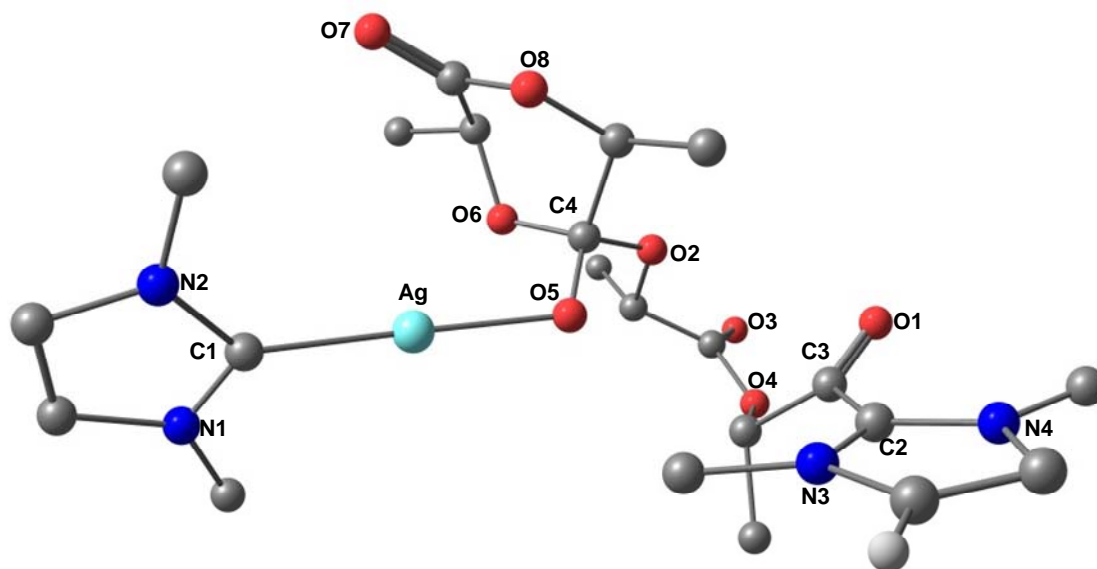

**Figure S27.** Computed structure of **I**([2+LL]→3). Selected bond lengths (Å) and angles (°): Ag-C1 2.083, Ag-O5 2.131, Ag···O6 2.768, O1-C3 1.212, C2-C3 1.516, C4-O5 1.347, C4-O6 1.451, O2-C4 1.430, C1-Ag-O5 176.49, Ag-O5-C4 111.87, O5-C4-O2 112.46, C1-Ag-O5-C4 -133.53, Ag-O5-C4-O6 -29.02, Ag-O5-C4-O2 -150.08.

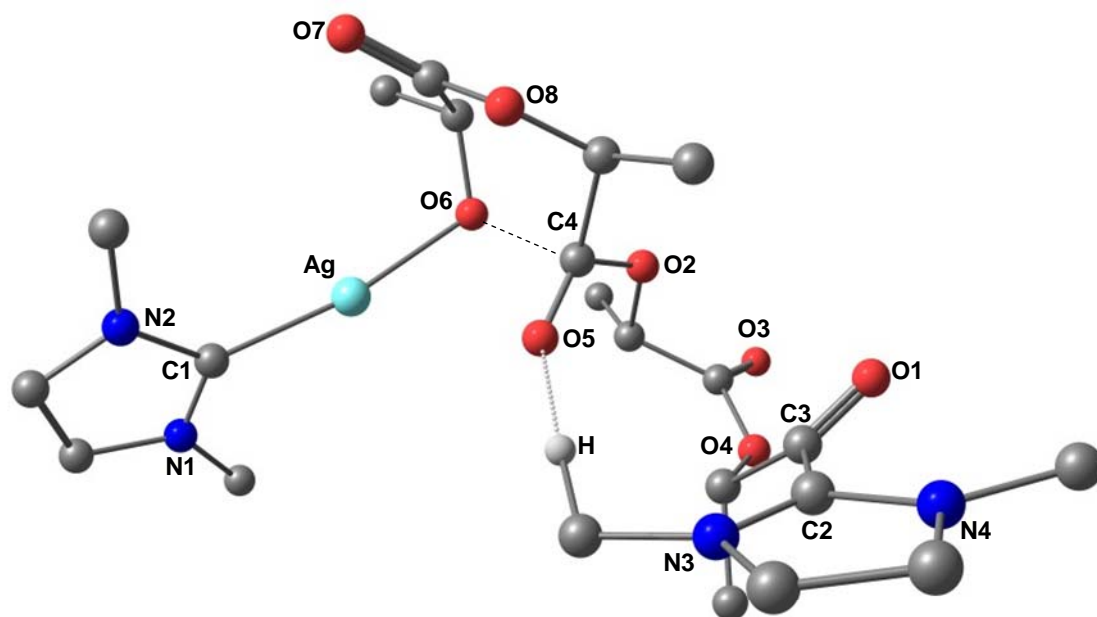

**Figure S28.** Computed structure of  $\text{TS}_2([2+\text{LL}]\rightarrow 3)$ . Selected bond lengths ( $\text{\AA}$ ) and angles ( $^\circ$ ): Ag-C1 2.088, Ag $\cdots$ O5 2.863, Ag-O6 2.140, C4-O5 1.248, C4 $\cdots$ O6 1.949, O2-C4 1.379, O1-C3 1.213, C2-C3 1.514, C1-Ag-O6 170.24, O5-C4-O2 121.15.

Calculated imaginary frequency along the bond C4 $\cdots$ O6 is  $i92$ .

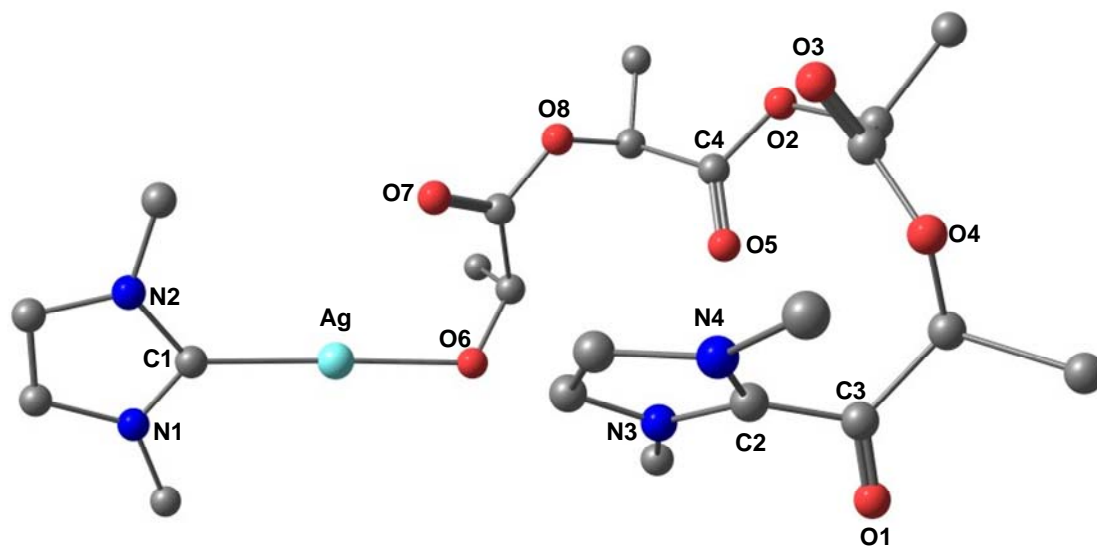

**Figure S29.** Computed structure of **3**. Selected bond lengths (Å) and angles (°): Ag-C1 2.081, Ag-O6 2.087, C4-O5 1.220, O2-C4 1.338, O1-C3 1.214, C2-C3 1.503, C1-Ag-O6 178.27, O5-C4-O2 122.70.



The Hartree-Fock (HF) and Density Functional Theory (DFT) computation studies on the reactant, product, transition state and the intermediate species, were carried out using GAUSSIAN 03<sup>1</sup> suite of quantum chemical programs.

**Table S1:** HF/STO-3G, LANL1MB level optimized coordinates of **1<sub>HF</sub>**.

Ground state electronic energy = -635.683476182 Hartree/Particle.

|    |              |              |              |
|----|--------------|--------------|--------------|
| C  | 2.208617000  | -0.000001000 | 0.000076000  |
| N  | 3.044392000  | 0.771342000  | 0.754274000  |
| N  | 3.044806000  | -0.770993000 | -0.754022000 |
| C  | 4.396327000  | 0.476919000  | 0.466220000  |
| H  | 5.208499000  | 0.986208000  | 0.964187000  |
| C  | 4.396583000  | -0.476055000 | -0.465754000 |
| H  | 5.209029000  | -0.985019000 | -0.963606000 |
| N  | -3.044476000 | 0.754272000  | -0.771204000 |
| N  | -3.044722000 | -0.754023000 | 0.771132000  |
| C  | -2.208617000 | -0.000007000 | -0.000030000 |
| C  | -4.396380000 | 0.466327000  | -0.476527000 |
| H  | -5.208607000 | 0.964358000  | -0.985665000 |
| C  | -4.396531000 | -0.465645000 | 0.476448000  |
| H  | -5.208921000 | -0.963417000 | 0.985580000  |
| Ag | 0.000000000  | -0.000391000 | -0.000124000 |
| C  | 2.634272000  | -1.787997000 | -1.748502000 |
| H  | 3.022168000  | -2.765092000 | -1.458013000 |
| H  | 1.547136000  | -1.826280000 | -1.785874000 |
| H  | 3.022093000  | -1.519414000 | -2.731873000 |
| C  | 2.633312000  | 1.788176000  | 1.748703000  |
| H  | 1.546156000  | 1.826167000  | 1.785774000  |
| H  | 3.020933000  | 1.519637000  | 2.732165000  |
| H  | 3.021030000  | 2.765390000  | 1.458379000  |
| C  | -2.634073000 | -1.748560000 | 1.788033000  |
| H  | -1.546933000 | -1.785877000 | 1.826242000  |
| H  | -3.021921000 | -1.458162000 | 2.765173000  |
| H  | -3.021862000 | -2.731931000 | 1.519401000  |
| C  | -2.633511000 | 1.748719000  | -1.788066000 |
| H  | -1.546360000 | 1.785887000  | -1.826086000 |
| H  | -3.021230000 | 1.458347000  | -2.765266000 |
| H  | -3.021212000 | 2.732150000  | -1.519529000 |

**Table S2:** HF/STO-3G, LANL1MB level optimized coordinates of **DL<sub>HF</sub>**.

Ground state electronic energy = -524.475629734 Hartree/Particle.

|   |              |              |              |
|---|--------------|--------------|--------------|
| O | -0.163294000 | 1.343571000  | -0.832983000 |
| C | -1.332260000 | 0.732828000  | -0.249888000 |
| C | -1.256888000 | -0.825849000 | -0.178726000 |
| O | -0.061307000 | -1.355415000 | 0.338782000  |
| C | 1.101207000  | -0.759916000 | -0.274292000 |
| C | 1.035883000  | 0.802405000  | -0.338203000 |
| O | -2.192973000 | -1.557777000 | -0.424598000 |
| O | 1.978943000  | 1.530638000  | -0.109266000 |
| C | 2.341095000  | -1.230340000 | 0.514084000  |
| H | 3.240966000  | -0.824163000 | 0.063114000  |
| H | 2.282513000  | -0.895074000 | 1.544846000  |
| H | 2.392112000  | -2.314592000 | 0.499543000  |
| H | 1.180937000  | -1.107312000 | -1.315152000 |
| C | -1.615848000 | 1.303441000  | 1.165564000  |
| H | -1.656921000 | 2.387426000  | 1.119190000  |
| H | -2.567572000 | 0.929552000  | 1.530423000  |
| H | -0.835562000 | 1.011934000  | 1.862765000  |
| H | -2.166564000 | 0.988682000  | -0.911452000 |

**Table S3:** HF/STO-3G, LANL1MB level optimized coordinates of [1+DL]<sub>HF</sub>.

Ground state electronic energy = -1160.197617 Hartree/Particle.

|   |              |              |              |
|---|--------------|--------------|--------------|
| O | 1.609643000  | -0.139445000 | -0.538761000 |
| C | 2.544710000  | -0.804163000 | -1.424770000 |
| C | 4.034908000  | -0.526456000 | -1.051785000 |
| O | 4.345807000  | -0.768085000 | 0.301516000  |
| C | 3.513136000  | 0.026822000  | 1.164557000  |
| C | 1.989985000  | -0.057044000 | 0.800272000  |
| O | 4.893486000  | -0.248278000 | -1.859569000 |
| O | 1.092223000  | 0.061289000  | 1.614378000  |
| C | -1.114884000 | 2.459487000  | -0.077096000 |
| N | -1.416872000 | 3.327310000  | 0.933527000  |
| N | -0.885515000 | 3.270993000  | -1.152071000 |
| C | -1.374509000 | 4.668409000  | 0.483877000  |
| H | -1.585883000 | 5.497499000  | 1.142816000  |
| C | -1.046974000 | 4.633756000  | -0.806010000 |
| H | -0.908039000 | 5.425441000  | -1.527160000 |
| N | -1.960547000 | -2.813630000 | 1.029438000  |

|    |              |              |              |
|----|--------------|--------------|--------------|
| N  | -2.532418000 | -2.521429000 | -1.025964000 |
| C  | -1.905227000 | -1.898801000 | 0.016127000  |
| C  | -2.619731000 | -3.994794000 | 0.614124000  |
| H  | -2.761764000 | -4.832470000 | 1.280728000  |
| C  | -2.972459000 | -3.814550000 | -0.656864000 |
| H  | -3.491512000 | -4.459518000 | -1.350273000 |
| Ag | -1.018616000 | 0.190386000  | 0.055645000  |
| C  | -0.532153000 | 2.818336000  | -2.513612000 |
| H  | 0.413660000  | 3.266665000  | -2.820001000 |
| H  | -0.433455000 | 1.734654000  | -2.506463000 |
| H  | -1.314017000 | 3.106579000  | -3.217558000 |
| C  | -1.751358000 | 2.950334000  | 2.323611000  |
| H  | -1.757629000 | 1.864733000  | 2.400287000  |
| H  | -1.008015000 | 3.358430000  | 3.009628000  |
| H  | -2.737187000 | 3.336990000  | 2.584293000  |
| C  | -2.752853000 | -1.947315000 | -2.370272000 |
| H  | -2.387996000 | -0.922233000 | -2.376967000 |
| H  | -2.215758000 | -2.531252000 | -3.118986000 |
| H  | -3.818203000 | -1.951866000 | -2.603050000 |
| C  | -1.434610000 | -2.622647000 | 2.398185000  |
| H  | -0.967277000 | -1.642573000 | 2.462337000  |
| H  | -2.249766000 | -2.683837000 | 3.120168000  |
| H  | -0.695380000 | -3.392733000 | 2.621399000  |
| C  | 3.747933000  | -0.430081000 | 2.620838000  |
| H  | 3.126264000  | 0.151824000  | 3.294429000  |
| H  | 3.506041000  | -1.482778000 | 2.730165000  |
| H  | 4.792345000  | -0.280491000 | 2.876899000  |
| H  | 3.782621000  | 1.089769000  | 1.070292000  |
| C  | 2.277536000  | -2.329976000 | -1.444367000 |
| H  | 1.238734000  | -2.517184000 | -1.702155000 |
| H  | 2.913094000  | -2.801360000 | -2.188088000 |
| H  | 2.489152000  | -2.770184000 | -0.473976000 |
| H  | 2.362419000  | -0.386680000 | -2.419972000 |

**Table S4:** HF/STO-3G, LANL1MB level optimized coordinates of  $\text{TS}_1([\mathbf{1}+\text{DL}]\rightarrow\mathbf{2}')_{\text{HF}}$ .

Ground state electronic energy = -1160.13442 Hartree/Particle.

Calculated imaginary frequency along the bond  $\text{C2}\cdots\text{C3}$  is i167.

|   |             |              |              |
|---|-------------|--------------|--------------|
| O | 1.225867000 | -0.119834000 | -0.619828000 |
| C | 2.375597000 | -0.053446000 | -1.495338000 |
| C | 3.665743000 | -0.459263000 | -0.705632000 |
| O | 3.794621000 | 0.087623000  | 0.581134000  |
| C | 2.834533000 | 1.126903000  | 0.857565000  |

|    |              |              |              |
|----|--------------|--------------|--------------|
| C  | 1.405258000  | 0.515770000  | 0.612386000  |
| O  | 4.511095000  | -1.219397000 | -1.123771000 |
| O  | 0.659115000  | 0.091641000  | 1.513671000  |
| C  | 0.274293000  | 2.467640000  | 0.101095000  |
| N  | -0.390798000 | 3.167691000  | 1.081010000  |
| N  | 0.020002000  | 3.229271000  | -1.020346000 |
| C  | -1.018272000 | 4.335055000  | 0.577466000  |
| H  | -1.579998000 | 5.000763000  | 1.215080000  |
| C  | -0.762401000 | 4.374271000  | -0.724416000 |
| H  | -1.048542000 | 5.081641000  | -1.487920000 |
| N  | -2.643199000 | -3.911406000 | 1.357918000  |
| N  | -2.604043000 | -3.562421000 | -0.770529000 |
| C  | -2.085934000 | -3.107994000 | 0.406989000  |
| C  | -3.504407000 | -4.864562000 | 0.767789000  |
| H  | -4.039593000 | -5.592141000 | 1.360359000  |
| C  | -3.480668000 | -4.648840000 | -0.547208000 |
| H  | -3.990407000 | -5.145484000 | -1.359767000 |
| Ag | -0.651093000 | -1.448992000 | 0.731850000  |
| C  | 0.496534000  | 2.930164000  | -2.385367000 |
| H  | 1.540172000  | 3.225226000  | -2.511063000 |
| H  | 0.393336000  | 1.865866000  | -2.588533000 |
| H  | -0.110077000 | 3.483402000  | -3.100102000 |
| C  | -0.478650000 | 2.787969000  | 2.507293000  |
| H  | -0.026240000 | 1.808422000  | 2.637691000  |
| H  | 0.041014000  | 3.520106000  | 3.127287000  |
| H  | -1.524204000 | 2.746487000  | 2.813177000  |
| C  | -2.310006000 | -3.020460000 | -2.115285000 |
| H  | -1.636429000 | -2.171992000 | -2.011559000 |
| H  | -1.836464000 | -3.788174000 | -2.728691000 |
| H  | -3.235269000 | -2.693179000 | -2.590957000 |
| C  | -2.398657000 | -3.834183000 | 2.815929000  |
| H  | -1.749606000 | -2.984594000 | 3.019947000  |
| H  | -3.345750000 | -3.700514000 | 3.339634000  |
| H  | -1.917008000 | -4.750524000 | 3.159706000  |
| C  | 3.032767000  | 1.569035000  | 2.320400000  |
| H  | 2.434268000  | 2.449105000  | 2.528121000  |
| H  | 4.080681000  | 1.809203000  | 2.473799000  |
| H  | 2.748007000  | 0.770922000  | 2.998926000  |
| C  | 2.136450000  | -0.995200000 | -2.690256000 |
| H  | 2.993844000  | -0.959111000 | -3.355655000 |
| H  | 1.249989000  | -0.683497000 | -3.234684000 |
| H  | 2.006418000  | -2.016696000 | -2.344144000 |
| H  | 2.974916000  | 1.979624000  | 0.183338000  |
| H  | 2.496285000  | 0.975955000  | -1.854765000 |

**Table S5:** HF/STO-3G, LANL1MB level optimized coordinates of **I([1+DL]→2')**<sub>HF</sub>.

Ground state electronic energy = -1160.175897 Hartree/Particle.

|    |              |              |              |
|----|--------------|--------------|--------------|
| O  | -1.593088000 | 0.911241000  | -1.120447000 |
| C  | -1.061521000 | 2.230214000  | -0.865689000 |
| C  | -0.031624000 | 2.190985000  | 0.304049000  |
| O  | -0.486141000 | 1.607574000  | 1.493293000  |
| C  | -1.813258000 | 1.059795000  | 1.367090000  |
| C  | -1.785851000 | 0.118140000  | 0.085708000  |
| O  | 1.125406000  | 2.555738000  | 0.233795000  |
| O  | -0.849770000 | -0.866423000 | 0.200570000  |
| C  | -3.229123000 | -0.546795000 | -0.121046000 |
| N  | -4.353864000 | 0.021355000  | -0.636202000 |
| N  | -3.551832000 | -1.819298000 | 0.206304000  |
| C  | -5.396535000 | -0.925768000 | -0.620649000 |
| H  | -6.382123000 | -0.681300000 | -0.990991000 |
| C  | -4.903316000 | -2.056345000 | -0.102974000 |
| H  | -5.362948000 | -3.017758000 | 0.079229000  |
| N  | 4.241207000  | 0.093843000  | 0.788997000  |
| N  | 4.175707000  | -1.048072000 | -1.038802000 |
| C  | 3.374085000  | -0.511827000 | -0.073272000 |
| C  | 5.576301000  | -0.057821000 | 0.350004000  |
| H  | 6.407487000  | 0.356878000  | 0.900688000  |
| C  | 5.536447000  | -0.766489000 | -0.777525000 |
| H  | 6.324738000  | -1.109503000 | -1.430858000 |
| Ag | 1.170065000  | -0.537787000 | 0.056560000  |
| C  | -2.598040000 | -2.815038000 | 0.775362000  |
| H  | -1.628411000 | -2.299710000 | 0.714283000  |
| H  | -2.891676000 | -3.049156000 | 1.798365000  |
| H  | -2.623951000 | -3.713134000 | 0.160323000  |
| C  | -4.504956000 | 1.402749000  | -1.164251000 |
| H  | -4.640460000 | 2.106722000  | -0.341343000 |
| H  | -3.616533000 | 1.655924000  | -1.739253000 |
| H  | -5.383118000 | 1.422068000  | -1.807231000 |
| C  | 3.716916000  | -1.824265000 | -2.211028000 |
| H  | 2.633680000  | -1.916555000 | -2.167069000 |
| H  | 4.001248000  | -1.310224000 | -3.129955000 |
| H  | 4.166934000  | -2.817488000 | -2.195108000 |
| C  | 3.859081000  | 0.858602000  | 1.997261000  |
| H  | 2.860093000  | 0.556041000  | 2.305157000  |
| H  | 4.566514000  | 0.639998000  | 2.796672000  |
| H  | 3.864623000  | 1.928639000  | 1.784091000  |
| C  | -2.120533000 | 0.296325000  | 2.669533000  |

|   |              |              |              |
|---|--------------|--------------|--------------|
| H | -1.964033000 | 0.954667000  | 3.518104000  |
| H | -1.461627000 | -0.561002000 | 2.765908000  |
| H | -3.152391000 | -0.040972000 | 2.677563000  |
| C | -0.402800000 | 2.744601000  | -2.161638000 |
| H | -0.028435000 | 3.752471000  | -2.009832000 |
| H | -1.133002000 | 2.754150000  | -2.965048000 |
| H | 0.423533000  | 2.099265000  | -2.444692000 |
| H | -2.545507000 | 1.865956000  | 1.236423000  |
| H | -1.869083000 | 2.917807000  | -0.579133000 |

**Table S6:** HF/STO-3G, LANL1MB level optimized coordinates of  $\text{TS}_2([\mathbf{1}+\text{DL}]\rightarrow\mathbf{2}')_{\text{HF}}$ .

Ground state electronic energy = -1160.094952 Hartree/Particle.

Calculated imaginary frequency along the bond C3...O2 is i227.

|    |              |              |              |
|----|--------------|--------------|--------------|
| O  | -0.977367000 | 1.181467000  | -0.776907000 |
| C  | -0.956146000 | 2.572075000  | -0.497826000 |
| C  | -0.439489000 | 2.712983000  | 0.969141000  |
| O  | -1.308721000 | 2.311182000  | 2.005995000  |
| C  | -2.353970000 | 1.425095000  | 1.588590000  |
| C  | -1.755015000 | 0.125487000  | 0.941242000  |
| O  | 0.690401000  | 3.042520000  | 1.275317000  |
| O  | -0.677068000 | -0.370320000 | 1.252390000  |
| C  | -2.800151000 | -0.800522000 | 0.230641000  |
| N  | -3.170329000 | -2.013779000 | 0.722388000  |
| N  | -3.510992000 | -0.588353000 | -0.898100000 |
| C  | -4.145799000 | -2.566429000 | -0.125185000 |
| H  | -4.585291000 | -3.533518000 | 0.077142000  |
| C  | -4.351764000 | -1.692409000 | -1.120996000 |
| H  | -5.006084000 | -1.734829000 | -1.981059000 |
| N  | 3.947257000  | -0.484217000 | 0.299291000  |
| N  | 3.806903000  | -0.876510000 | -1.815821000 |
| C  | 3.081539000  | -0.419406000 | -0.754047000 |
| C  | 5.207970000  | -0.973828000 | -0.113204000 |
| H  | 6.027349000  | -1.093331000 | 0.579996000  |
| C  | 5.120638000  | -1.218786000 | -1.419774000 |
| H  | 5.846302000  | -1.600523000 | -2.122441000 |
| Ag | 0.996558000  | 0.365838000  | -0.720925000 |
| C  | -3.323640000 | 0.583997000  | -1.807278000 |
| H  | -4.119988000 | 1.304769000  | -1.623448000 |
| H  | -2.300082000 | 0.963806000  | -1.537927000 |
| H  | -3.381735000 | 0.221996000  | -2.831041000 |
| C  | -2.657116000 | -2.673234000 | 1.954973000  |
| H  | -1.740234000 | -2.173979000 | 2.263396000  |

|   |              |              |              |
|---|--------------|--------------|--------------|
| H | -3.408613000 | -2.609420000 | 2.744267000  |
| H | -2.448516000 | -3.718446000 | 1.726930000  |
| C | 3.319340000  | -0.999751000 | -3.206520000 |
| H | 2.287801000  | -0.655829000 | -3.246723000 |
| H | 3.931856000  | -0.386410000 | -3.868314000 |
| H | 3.369187000  | -2.041407000 | -3.525875000 |
| C | 3.651868000  | -0.060223000 | 1.686137000  |
| H | 2.579376000  | 0.095393000  | 1.786160000  |
| H | 3.971939000  | -0.838414000 | 2.379013000  |
| H | 4.175931000  | 0.869242000  | 1.913727000  |
| C | -3.155506000 | 1.056714000  | 2.863091000  |
| H | -3.989217000 | 0.405235000  | 2.618495000  |
| H | -3.544498000 | 1.966426000  | 3.309666000  |
| H | -2.511817000 | 0.564361000  | 3.585842000  |
| C | -0.087164000 | 3.420243000  | -1.454966000 |
| H | -0.208869000 | 4.478957000  | -1.245696000 |
| H | -0.390381000 | 3.229257000  | -2.480261000 |
| H | 0.964944000  | 3.167789000  | -1.345069000 |
| H | -3.033782000 | 1.891533000  | 0.868036000  |
| H | -1.979295000 | 2.976526000  | -0.551164000 |

**Table S7:** HF/STO-3G, LANL1MB level optimized coordinates of **2'**<sub>HF</sub>.

Ground state electronic energy = -1160.100071 Hartree/Particle.

|   |              |              |              |
|---|--------------|--------------|--------------|
| O | -0.492698000 | 0.774030000  | -1.387690000 |
| C | -0.716796000 | 2.160141000  | -1.227628000 |
| C | -0.603380000 | 2.474497000  | 0.303163000  |
| O | -1.763955000 | 2.489594000  | 1.113744000  |
| C | -2.741779000 | 1.506328000  | 0.754930000  |
| C | -2.123293000 | 0.067300000  | 0.765335000  |
| O | 0.468015000  | 2.626052000  | 0.861670000  |
| O | -1.060652000 | -0.228019000 | 1.283006000  |
| C | -2.965423000 | -1.039227000 | 0.083070000  |
| N | -3.601290000 | -2.054457000 | 0.725939000  |
| N | -3.186948000 | -1.176985000 | -1.239957000 |
| C | -4.250046000 | -2.849117000 | -0.233208000 |
| H | -4.824846000 | -3.719715000 | 0.051617000  |
| C | -3.994012000 | -2.311316000 | -1.436007000 |
| H | -4.295871000 | -2.618309000 | -2.428187000 |
| N | 4.210040000  | -1.312220000 | -0.487799000 |
| N | 3.821577000  | -0.413359000 | 1.432651000  |
| C | 3.264348000  | -0.610246000 | 0.202157000  |

|    |              |              |              |
|----|--------------|--------------|--------------|
| C  | 5.350677000  | -1.546203000 | 0.314575000  |
| H  | 6.208325000  | -2.086165000 | -0.058089000 |
| C  | 5.110742000  | -0.990378000 | 1.501078000  |
| H  | 5.712229000  | -0.936005000 | 2.396210000  |
| Ag | 1.310159000  | 0.141497000  | -0.539118000 |
| C  | -2.617098000 | -0.308730000 | -2.331679000 |
| H  | -3.387540000 | 0.410604000  | -2.608440000 |
| H  | -1.631354000 | 0.191212000  | -1.944525000 |
| H  | -2.431841000 | -0.967952000 | -3.175950000 |
| C  | -3.627859000 | -2.299164000 | 2.193546000  |
| H  | -2.833361000 | -1.721971000 | 2.663778000  |
| H  | -4.597234000 | -2.002077000 | 2.598920000  |
| H  | -3.463107000 | -3.361876000 | 2.372557000  |
| C  | 3.198588000  | 0.318456000  | 2.557613000  |
| H  | 2.206820000  | 0.648942000  | 2.256476000  |
| H  | 3.117428000  | -0.338823000 | 3.423980000  |
| H  | 3.805757000  | 1.187029000  | 2.815026000  |
| C  | 4.096776000  | -1.766874000 | -1.890573000 |
| H  | 4.175494000  | -2.853701000 | -1.934695000 |
| H  | 3.130420000  | -1.455838000 | -2.282053000 |
| H  | 4.891136000  | -1.319635000 | -2.489163000 |
| C  | -3.886587000 | 1.610580000  | 1.794684000  |
| H  | -4.675864000 | 0.899959000  | 1.567851000  |
| H  | -4.300737000 | 2.613513000  | 1.762273000  |
| H  | -3.508103000 | 1.424231000  | 2.795288000  |
| C  | 0.268890000  | 3.059924000  | -2.014524000 |
| H  | -0.016062000 | 4.105461000  | -1.940203000 |
| H  | 0.258735000  | 2.767262000  | -3.060078000 |
| H  | 1.279221000  | 2.946824000  | -1.628969000 |
| H  | -3.156396000 | 1.677058000  | -0.244897000 |
| H  | -1.732547000 | 2.409694000  | -1.571054000 |

**Table S8:** HF/STO-3G, LANL1MB level optimized coordinates of LL<sub>HF</sub>.

Ground state electronic energy = -524.475629721 Hartree/Particle.

|   |             |              |              |
|---|-------------|--------------|--------------|
| O | 0.163160000 | 1.343584000  | -0.833017000 |
| C | 1.332191000 | 0.733087000  | -0.249772000 |
| H | 1.656142000 | 2.387404000  | 1.119829000  |
| H | 2.166658000 | 0.989207000  | -0.911037000 |
| C | 1.615325000 | 1.303396000  | 1.165894000  |
| H | 2.567071000 | 0.929644000  | 1.530837000  |
| H | 0.834982000 | 1.011512000  | 1.862871000  |
| C | 1.257089000 | -0.825604000 | -0.178831000 |



|   |              |              |              |
|---|--------------|--------------|--------------|
| O | 2.193271000  | -1.557377000 | -0.424762000 |
| O | 0.061571000  | -1.355395000 | 0.338650000  |
| C | -1.101074000 | -0.760043000 | -0.274295000 |
| H | -1.180825000 | -1.107463000 | -1.315143000 |
| C | -2.340826000 | -1.230627000 | 0.514224000  |
| H | -2.281963000 | -0.895688000 | 1.545074000  |
| H | -2.391959000 | -2.314873000 | 0.499368000  |
| H | -3.240760000 | -0.824219000 | 0.063601000  |
| C | -1.035988000 | 0.802288000  | -0.338261000 |
| O | -1.979207000 | 1.530376000  | -0.109515000 |

**Table S9:** HF/STO-3G, LANL1MB level optimized coordinates of  $[1+LL]_{HF}$ .

Ground state electronic energy = -1160.197812 Hartree/Particle.

|   |              |              |              |
|---|--------------|--------------|--------------|
| O | -1.095717000 | -1.249175000 | 0.230334000  |
| C | -1.459087000 | -2.470269000 | 0.919658000  |
| C | -2.903185000 | -2.939918000 | 0.551273000  |
| O | -3.117204000 | -3.090742000 | -0.832657000 |
| C | -2.816893000 | -1.883334000 | -1.554509000 |
| C | -1.489644000 | -1.183390000 | -1.106469000 |
| O | -3.741542000 | -3.275099000 | 1.358579000  |
| O | -0.827190000 | -0.468738000 | -1.836227000 |
| C | -1.303575000 | -2.235324000 | 2.433687000  |
| H | -0.770045000 | -3.263851000 | 0.595301000  |
| H | -1.533445000 | -3.151472000 | 2.969189000  |
| H | -1.981236000 | -1.455349000 | 2.767642000  |
| H | -0.280667000 | -1.943420000 | 2.655398000  |
| C | -3.980537000 | -0.856859000 | -1.467917000 |
| H | -4.114862000 | -0.506043000 | -0.448567000 |
| H | -4.898235000 | -1.334508000 | -1.798194000 |
| H | -3.770682000 | -0.007849000 | -2.111517000 |
| H | -2.681004000 | -2.176979000 | -2.601765000 |
| C | -0.400871000 | 2.554888000  | 0.179144000  |
| N | -0.611034000 | 3.509188000  | -0.775223000 |
| N | -1.066223000 | 3.029872000  | 1.273847000  |
| C | -1.402801000 | 4.568324000  | -0.271488000 |
| H | -1.674551000 | 5.416929000  | -0.881667000 |
| C | -1.683019000 | 4.272964000  | 0.996019000  |
| H | -2.254238000 | 4.805322000  | 1.741964000  |
| N | 3.290374000  | -1.250484000 | -1.104136000 |
| N | 3.532308000  | -0.852190000 | 0.998161000  |
| C | 2.700309000  | -0.601652000 | -0.056377000 |
| C | 4.480717000  | -1.898300000 | -0.697224000 |
| H | 5.087736000  | -2.462384000 | -1.389734000 |

|    |              |              |              |
|----|--------------|--------------|--------------|
| C  | 4.629821000  | -1.652873000 | 0.602711000  |
| H  | 5.396112000  | -1.954729000 | 1.301202000  |
| Ag | 0.796116000  | 0.636608000  | -0.061252000 |
| C  | -1.132383000 | 2.371098000  | 2.594889000  |
| H  | -2.173424000 | 2.210376000  | 2.877288000  |
| H  | -0.621910000 | 1.412144000  | 2.532549000  |
| H  | -0.645394000 | 2.992905000  | 3.347345000  |
| C  | -0.095465000 | 3.472765000  | -2.160718000 |
| H  | 0.546639000  | 2.601295000  | -2.273029000 |
| H  | -0.924524000 | 3.406477000  | -2.866501000 |
| H  | 0.481944000  | 4.375550000  | -2.362360000 |
| C  | 3.348840000  | -0.360414000 | 2.380037000  |
| H  | 2.484826000  | 0.300534000  | 2.404211000  |
| H  | 3.186322000  | -1.199727000 | 3.057705000  |
| H  | 4.234214000  | 0.192959000  | 2.694657000  |
| C  | 2.793770000  | -1.277296000 | -2.496678000 |
| H  | 1.873893000  | -0.699702000 | -2.553700000 |
| H  | 3.538039000  | -0.840156000 | -3.163255000 |
| H  | 2.596311000  | -2.306025000 | -2.800314000 |

**Table S10:** HF/STO-3G, LANL1MB level optimized coordinates of  $\text{TS}_1([\mathbf{1}+\text{LL}]\rightarrow\mathbf{2})_{\text{HF}}$ .

Ground state electronic energy = -1160.134420 Hartree/Particle.

Calculated imaginary frequency along the bond C2...C3 is i167.

|   |              |             |              |
|---|--------------|-------------|--------------|
| O | -0.461845000 | 6.541495000 | -0.052414000 |
| C | -0.578220000 | 7.926295000 | 0.349569000  |
| C | -2.088532000 | 8.338010000 | 0.396972000  |
| O | -2.958356000 | 7.411395000 | 0.993844000  |
| C | -2.272018000 | 6.347044000 | 1.682594000  |
| C | -1.304596000 | 5.669212000 | 0.642863000  |
| O | -2.530765000 | 9.365480000 | -0.067785000 |
| O | -1.558805000 | 4.616009000 | 0.030443000  |
| C | 0.203150000  | 8.794990000 | -0.653800000 |
| H | -0.152228000 | 8.047552000 | 1.353185000  |
| H | 0.122098000  | 9.839208000 | -0.367056000 |
| H | -0.205326000 | 8.675118000 | -1.653266000 |
| H | 1.250121000  | 8.506503000 | -0.655312000 |
| C | -3.338356000 | 5.366068000 | 2.207259000  |
| H | -3.828051000 | 4.861460000 | 1.380192000  |
| H | -4.079116000 | 5.924492000 | 2.771860000  |
| H | -2.879466000 | 4.629659000 | 2.857640000  |
| H | -1.677256000 | 6.738832000 | 2.515769000  |
| C | 0.262211000  | 4.179384000 | -3.905483000 |

|    |              |             |              |
|----|--------------|-------------|--------------|
| N  | -0.244036000 | 3.299637000 | -4.816545000 |
| N  | 1.333245000  | 4.744007000 | -4.534435000 |
| C  | 0.512939000  | 3.322130000 | -6.010245000 |
| H  | 0.266194000  | 2.692603000 | -6.852710000 |
| C  | 1.487737000  | 4.214163000 | -5.835991000 |
| H  | 2.282655000  | 4.537775000 | -6.491827000 |
| N  | 0.185208000  | 3.565486000 | 2.600744000  |
| N  | 1.427741000  | 5.305600000 | 2.728593000  |
| C  | 0.276638000  | 4.851119000 | 2.119664000  |
| C  | 1.239617000  | 3.248223000 | 3.493822000  |
| H  | 1.315862000  | 2.280115000 | 3.965212000  |
| C  | 2.008782000  | 4.327011000 | 3.574471000  |
| H  | 2.912552000  | 4.520180000 | 4.132210000  |
| Ag | -0.512061000 | 4.588086000 | -1.868303000 |
| C  | 2.230333000  | 5.773923000 | -3.966059000 |
| H  | 1.918969000  | 5.984906000 | -2.944833000 |
| H  | 3.257442000  | 5.407142000 | -3.963797000 |
| H  | 2.170378000  | 6.686461000 | -4.560683000 |
| C  | -1.426493000 | 2.430019000 | -4.623882000 |
| H  | -1.793271000 | 2.554111000 | -3.606649000 |
| H  | -2.210187000 | 2.708823000 | -5.329534000 |
| H  | -1.145095000 | 1.388570000 | -4.782997000 |
| C  | 2.014785000  | 6.649351000 | 2.556705000  |
| H  | 1.970242000  | 6.941520000 | 1.509177000  |
| H  | 1.488676000  | 7.388921000 | 3.163573000  |
| H  | 3.057387000  | 6.621513000 | 2.868316000  |
| C  | -0.865633000 | 2.584753000 | 2.254219000  |
| H  | -1.493539000 | 3.005176000 | 1.473084000  |
| H  | -0.405558000 | 1.665209000 | 1.891946000  |
| H  | -1.472359000 | 2.353414000 | 3.131049000  |

**Table S11:** HF/STO-3G, LANL1MB level optimized coordinates of  $\mathbf{I}([\mathbf{1}+\mathbf{LL}]\rightarrow\mathbf{2})_{\text{HF}}$ .

Ground state electronic energy = -1160.160859 Hartree/Particle.

|   |              |              |              |
|---|--------------|--------------|--------------|
| O | -1.143341000 | 0.645452000  | 0.812125000  |
| C | -1.347527000 | 2.063627000  | 0.986082000  |
| C | -2.716746000 | 2.592973000  | 0.438082000  |
| O | -3.496416000 | 1.685718000  | -0.296838000 |
| C | -2.695127000 | 0.919126000  | -1.213018000 |
| C | -1.614952000 | 0.047309000  | -0.420304000 |
| O | -3.148737000 | 3.692847000  | 0.707895000  |
| O | -0.568455000 | -0.351031000 | -1.193536000 |

|    |              |              |              |
|----|--------------|--------------|--------------|
| C  | -0.153275000 | 2.918831000  | 0.491548000  |
| H  | -1.403161000 | 2.202427000  | 2.072831000  |
| H  | -0.370998000 | 3.969472000  | 0.661893000  |
| H  | 0.044586000  | 2.768840000  | -0.564238000 |
| H  | 0.736472000  | 2.653466000  | 1.056090000  |
| C  | -2.094327000 | 1.762508000  | -2.362853000 |
| H  | -1.502264000 | 2.591973000  | -1.996264000 |
| H  | -2.902982000 | 2.159849000  | -2.968651000 |
| H  | -1.465068000 | 1.129468000  | -2.979569000 |
| H  | -3.395020000 | 0.212683000  | -1.669751000 |
| C  | 3.457649000  | -0.186892000 | 0.153783000  |
| N  | 4.514489000  | 0.012375000  | -0.686454000 |
| N  | 4.030454000  | -0.358767000 | 1.380963000  |
| C  | 5.738014000  | -0.034908000 | 0.020942000  |
| H  | 6.687929000  | 0.101676000  | -0.474446000 |
| C  | 5.439123000  | -0.264790000 | 1.298486000  |
| H  | 6.069207000  | -0.373962000 | 2.168700000  |
| N  | -2.535064000 | -2.380917000 | -0.659637000 |
| N  | -3.083260000 | -1.475337000 | 1.244392000  |
| C  | -2.411692000 | -1.255684000 | 0.083923000  |
| C  | -3.299904000 | -3.328106000 | 0.047070000  |
| H  | -3.517231000 | -4.302061000 | -0.368566000 |
| C  | -3.635520000 | -2.772901000 | 1.216510000  |
| H  | -4.212119000 | -3.154785000 | 2.047117000  |
| Ag | 1.310488000  | -0.219368000 | -0.381320000 |
| C  | 3.307499000  | -0.615667000 | 2.644877000  |
| H  | 2.239699000  | -0.640089000 | 2.437762000  |
| H  | 3.618751000  | -1.574632000 | 3.060888000  |
| H  | 3.521321000  | 0.178213000  | 3.361546000  |
| C  | 4.430675000  | 0.253174000  | -2.143872000 |
| H  | 3.386786000  | 0.207898000  | -2.448038000 |
| H  | 4.835846000  | 1.237808000  | -2.380454000 |
| H  | 4.997070000  | -0.511570000 | -2.676329000 |
| C  | -3.275020000 | -0.517337000 | 2.366535000  |
| H  | -2.308589000 | -0.246126000 | 2.790376000  |
| H  | -3.790263000 | 0.372397000  | 2.002724000  |
| H  | -3.886329000 | -1.010079000 | 3.120368000  |
| C  | -1.975861000 | -2.557485000 | -2.029820000 |
| H  | -2.789990000 | -2.546310000 | -2.755421000 |
| H  | -1.287317000 | -1.715421000 | -2.162030000 |
| H  | -1.448042000 | -3.508864000 | -2.074353000 |

**Table S12:** HF/STO-3G, LANL1MB level optimized coordinates of  $\text{TS}_2([\mathbf{1}+\text{LL}]\rightarrow\mathbf{2})_{\text{HF}}$ .

Ground state electronic energy = -1160.094952 Hartree/Particle.

Calculated imaginary frequency along the bond C3...O2 is i227.

|    |              |              |              |
|----|--------------|--------------|--------------|
| O  | -0.938940000 | 0.140074000  | 1.244425000  |
| C  | -1.208738000 | 1.313833000  | 1.993827000  |
| C  | -0.794816000 | 2.514426000  | 1.084962000  |
| O  | -1.609989000 | 2.795249000  | -0.032498000 |
| C  | -2.437479000 | 1.702284000  | -0.447958000 |
| C  | -1.562996000 | 0.446669000  | -0.802229000 |
| O  | 0.231751000  | 3.154322000  | 1.210164000  |
| O  | -0.422070000 | 0.500410000  | -1.249435000 |
| C  | -0.486632000 | 1.401723000  | 3.358183000  |
| H  | -2.288880000 | 1.382996000  | 2.198211000  |
| H  | -0.827037000 | 2.268950000  | 3.916326000  |
| H  | 0.588933000  | 1.483699000  | 3.219693000  |
| H  | -0.700571000 | 0.507573000  | 3.936432000  |
| C  | -3.203285000 | 2.182321000  | -1.707175000 |
| H  | -2.505852000 | 2.446779000  | -2.496330000 |
| H  | -3.785600000 | 3.061922000  | -1.451183000 |
| H  | -3.878184000 | 1.410324000  | -2.064749000 |
| H  | -3.165168000 | 1.414890000  | 0.318062000  |
| C  | 3.353374000  | -0.262515000 | 0.572550000  |
| N  | 4.200875000  | -1.189735000 | 1.105902000  |
| N  | 4.168116000  | 0.569620000  | -0.139444000 |
| C  | 5.538167000  | -0.927883000 | 0.727764000  |
| H  | 6.355323000  | -1.554336000 | 1.053135000  |
| C  | 5.518021000  | 0.160874000  | -0.039675000 |
| H  | 6.313950000  | 0.698032000  | -0.533786000 |
| N  | -2.510632000 | -1.454816000 | -2.256133000 |
| N  | -3.059333000 | -1.629317000 | -0.148447000 |
| C  | -2.369880000 | -0.876404000 | -1.032834000 |
| C  | -3.318172000 | -2.597683000 | -2.125422000 |
| H  | -3.563524000 | -3.214656000 | -2.978942000 |
| C  | -3.651671000 | -2.705675000 | -0.831170000 |
| H  | -4.246462000 | -3.442479000 | -0.308689000 |
| Ag | 1.153920000  | -0.051300000 | 0.859956000  |
| C  | 3.734015000  | 1.772803000  | -0.883945000 |
| H  | 2.648831000  | 1.763855000  | -0.966142000 |
| H  | 4.050341000  | 2.674235000  | -0.356969000 |
| H  | 4.173712000  | 1.760148000  | -1.881245000 |
| C  | 3.808560000  | -2.320700000 | 1.974208000  |
| H  | 2.731544000  | -2.287555000 | 2.125555000  |
| H  | 4.081313000  | -3.264158000 | 1.499859000  |
| H  | 4.312594000  | -2.238665000 | 2.937828000  |
| C  | -3.071339000 | -1.399276000 | 1.329064000  |
| H  | -2.157183000 | -0.768149000 | 1.503635000  |
| H  | -4.003070000 | -0.904599000 | 1.602283000  |

|   |              |              |              |
|---|--------------|--------------|--------------|
| H | -3.011410000 | -2.369739000 | 1.816015000  |
| C | -1.929502000 | -0.979283000 | -3.542088000 |
| H | -2.712224000 | -0.522446000 | -4.150730000 |
| H | -1.146291000 | -0.254829000 | -3.325764000 |
| H | -1.504952000 | -1.834793000 | -4.067311000 |

**Table S13:** HF/STO-3G, LANL1MB level optimized coordinates of **2<sub>HF</sub>**.

Ground state electronic energy = -1160.100071 Hartree/Particle.

|    |              |              |              |
|----|--------------|--------------|--------------|
| O  | 0.492565000  | 0.773763000  | -1.387629000 |
| C  | 0.716732000  | 2.159888000  | -1.227816000 |
| C  | 0.603546000  | 2.474440000  | 0.302942000  |
| O  | 1.764312000  | 2.489884000  | 1.113273000  |
| C  | 2.742036000  | 1.506457000  | 0.754608000  |
| C  | 2.123471000  | 0.067478000  | 0.765250000  |
| O  | -0.467773000 | 2.625849000  | 0.861627000  |
| O  | 1.060906000  | -0.227767000 | 1.283114000  |
| C  | -0.269033000 | 3.059599000  | -2.014701000 |
| H  | 1.732448000  | 2.409349000  | -1.571412000 |
| H  | 0.015982000  | 4.105135000  | -1.940597000 |
| H  | -1.279305000 | 2.946610000  | -1.628964000 |
| H  | -0.259061000 | 2.766768000  | -3.060210000 |
| C  | 3.886856000  | 1.610775000  | 1.794335000  |
| H  | 3.508372000  | 1.424625000  | 2.794976000  |
| H  | 4.301094000  | 2.613667000  | 1.761749000  |
| H  | 4.676064000  | 0.900044000  | 1.567608000  |
| H  | 3.156654000  | 1.676965000  | -0.245260000 |
| C  | -3.264420000 | -0.610304000 | 0.202233000  |
| N  | -4.210354000 | -1.311983000 | -0.487681000 |
| N  | -3.821484000 | -0.413359000 | 1.432799000  |
| C  | -5.351024000 | -1.545629000 | 0.314742000  |
| H  | -6.208855000 | -2.085323000 | -0.057890000 |
| C  | -5.110845000 | -0.989932000 | 1.501256000  |
| H  | -5.712257000 | -0.935440000 | 2.396432000  |
| N  | 3.601437000  | -2.054280000 | 0.726001000  |
| N  | 3.186838000  | -1.177207000 | -1.240022000 |
| C  | 2.965486000  | -1.039167000 | 0.083003000  |
| C  | 4.250052000  | -2.849134000 | -0.233067000 |
| H  | 4.824916000  | -3.719666000 | 0.051835000  |
| C  | 3.993880000  | -2.311570000 | -1.435945000 |
| H  | 4.295651000  | -2.618747000 | -2.428095000 |
| Ag | -1.310203000 | 0.141311000  | -0.538992000 |
| C  | -3.198207000 | 0.318216000  | 2.557758000  |
| H  | -2.205890000 | 0.647376000  | 2.256989000  |

|   |              |              |              |
|---|--------------|--------------|--------------|
| H | -3.804459000 | 1.187631000  | 2.814504000  |
| H | -3.118273000 | -0.338798000 | 3.424437000  |
| C | -4.097396000 | -1.766378000 | -1.890564000 |
| H | -3.130065000 | -1.457534000 | -2.281371000 |
| H | -4.178685000 | -2.852994000 | -1.935071000 |
| H | -4.890337000 | -1.317051000 | -2.489483000 |
| C | 2.616833000  | -0.309142000 | -2.331807000 |
| H | 1.631144000  | 0.190805000  | -1.944578000 |
| H | 3.387200000  | 0.410197000  | -2.608761000 |
| H | 2.431491000  | -0.968481000 | -3.175969000 |
| C | 3.628070000  | -2.298680000 | 2.193661000  |
| H | 4.597417000  | -2.001403000 | 2.598961000  |
| H | 2.833512000  | -1.721485000 | 2.663784000  |
| H | 3.463447000  | -3.361373000 | 2.372899000  |

**Table S14:** HF/STO-3G, LANL1MB level optimized coordinates of  $\mathbf{3}_{\text{HF}}$ .

Ground state electronic energy = -1684.6050804 Hartree/Particle.

|   |              |              |              |
|---|--------------|--------------|--------------|
| H | -4.615591000 | -3.315388000 | -1.073070000 |
| H | -5.404205000 | -1.976652000 | -1.942375000 |
| H | 4.137312000  | -0.165689000 | 2.957444000  |
| C | -4.582155000 | -2.244548000 | -1.277695000 |
| H | 4.063480000  | -1.920379000 | 2.809568000  |
| H | -6.671281000 | -2.168719000 | 0.608138000  |
| H | -3.637090000 | -1.992672000 | -1.753577000 |
| H | 1.610366000  | 1.057979000  | 4.143874000  |
| C | 4.285273000  | -0.999163000 | 2.279337000  |
| H | 5.325090000  | -1.013636000 | 1.966581000  |
| O | 0.005641000  | -0.009803000 | 1.416591000  |
| C | -5.820016000 | -1.544482000 | 0.834319000  |
| N | -4.689784000 | -1.485657000 | -0.014933000 |
| O | 1.982036000  | -1.025658000 | 1.336428000  |
| C | 1.210642000  | 0.121165000  | 1.544816000  |
| H | 2.917624000  | 1.440132000  | 2.036633000  |
| C | 1.293866000  | 1.818827000  | 3.436274000  |
| C | 3.378891000  | -0.864514000 | 1.028636000  |
| H | 0.209155000  | 1.864652000  | 3.422093000  |
| H | 3.568572000  | 0.089220000  | 0.517863000  |
| H | 2.836729000  | -0.517425000 | -2.060020000 |
| C | 1.827244000  | 1.489351000  | 2.021480000  |
| H | 1.683818000  | 2.781148000  | 3.753757000  |
| C | -5.579764000 | -0.724273000 | 1.854951000  |
| C | -3.748089000 | -0.627628000 | 0.478527000  |
| H | -6.174374000 | -0.471621000 | 2.719986000  |

|    |              |              |              |
|----|--------------|--------------|--------------|
| C  | 3.712443000  | -2.014088000 | 0.023510000  |
| C  | 1.876882000  | -0.934049000 | -2.353900000 |
| Ag | -1.795645000 | 0.025394000  | -0.428750000 |
| N  | -4.301479000 | -0.158928000 | 1.636202000  |
| H  | 3.573340000  | -4.739588000 | 0.899836000  |
| H  | 0.925383000  | -0.252757000 | -2.039104000 |
| O  | 1.383891000  | 2.539864000  | 1.140011000  |
| O  | 3.166141000  | 2.018969000  | -0.216357000 |
| O  | 4.837399000  | -2.388516000 | -0.245657000 |
| H  | 1.905675000  | -1.165821000 | -3.416891000 |
| C  | 2.486600000  | -2.707677000 | -0.613477000 |
| N  | 1.750345000  | -2.256361000 | -1.641623000 |
| O  | -0.108469000 | 0.443441000  | -1.644230000 |
| H  | -0.594184000 | 1.297515000  | -4.178288000 |
| C  | 2.197496000  | 2.715029000  | 0.019216000  |
| N  | 1.985879000  | -3.915358000 | -0.227623000 |
| C  | 0.737101000  | -3.194227000 | -1.905054000 |
| C  | 2.483268000  | -4.746985000 | 0.898135000  |
| H  | 0.022880000  | -3.032384000 | -2.700464000 |
| H  | -1.912178000 | 1.898606000  | -3.170120000 |
| H  | 2.126653000  | -5.765538000 | 0.753193000  |
| C  | 0.880728000  | -4.210954000 | -1.038795000 |
| C  | -3.681475000 | 0.826403000  | 2.547445000  |
| C  | -0.857302000 | 2.014987000  | -3.407143000 |
| H  | 0.319306000  | -5.126398000 | -0.915305000 |
| C  | 0.008240000  | 1.753712000  | -2.141354000 |
| H  | 2.105084000  | -4.355574000 | 1.844909000  |
| H  | -4.325498000 | 1.701671000  | 2.638084000  |
| H  | -2.720992000 | 1.127025000  | 2.135321000  |
| H  | -3.534041000 | 0.379910000  | 3.531501000  |
| H  | 1.057077000  | 1.943722000  | -2.411201000 |
| C  | 1.677548000  | 3.905034000  | -0.850633000 |
| H  | -0.693826000 | 3.017455000  | -3.792697000 |
| H  | 3.298193000  | 5.254450000  | -0.315656000 |
| H  | 2.064280000  | 3.756448000  | -1.866151000 |
| H  | 1.868941000  | 5.396375000  | 0.723269000  |
| C  | -0.435528000 | 2.781466000  | -1.040020000 |
| C  | 2.212322000  | 5.247955000  | -0.296038000 |
| O  | 0.241628000  | 3.995478000  | -0.834686000 |
| O  | -1.431141000 | 2.584329000  | -0.362454000 |
| H  | 1.842597000  | 6.061657000  | -0.912420000 |

**Table S15:** HF/STO-3G, LANL1MB level optimized coordinates of **4**<sub>HF</sub>.

Ground state electronic energy = -2209.0913563 Hartree/Particle.



|    |              |              |              |
|----|--------------|--------------|--------------|
| H  | 9.238410000  | -2.875188000 | -0.531465000 |
| H  | 8.843419000  | -3.140488000 | 1.184985000  |
| H  | -3.606487000 | -5.064605000 | 1.810143000  |
| C  | 8.544814000  | -2.624483000 | 0.271874000  |
| H  | -5.200692000 | -4.599933000 | 1.196683000  |
| H  | 10.649112000 | -0.917660000 | 1.038368000  |
| H  | 7.539688000  | -2.933973000 | -0.006686000 |
| H  | -4.428095000 | -2.530940000 | 4.197358000  |
| C  | -4.171289000 | -4.804129000 | 0.920288000  |
| H  | -4.153580000 | -5.643937000 | 0.233190000  |
| O  | -5.589805000 | -1.991437000 | 0.899125000  |
| C  | 9.695022000  | -0.436347000 | 0.885676000  |
| N  | 8.545411000  | -1.163803000 | 0.498312000  |
| O  | -3.358055000 | -2.462089000 | 1.154969000  |
| C  | -4.553119000 | -1.820908000 | 1.509716000  |
| H  | -3.220300000 | -0.808598000 | 2.854258000  |
| C  | -4.895681000 | -1.565825000 | 4.026216000  |
| C  | -3.520947000 | -3.569324000 | 0.249371000  |
| H  | -5.967827000 | -1.701284000 | 3.918888000  |
| H  | -2.500082000 | -3.833630000 | -0.052418000 |
| H  | -1.127652000 | -1.998627000 | -1.611605000 |
| C  | -4.308414000 | -0.909719000 | 2.754584000  |
| H  | -4.705333000 | -0.925631000 | 4.882180000  |
| C  | 9.327867000  | 0.838489000  | 0.995710000  |
| C  | 7.464280000  | -0.339323000 | 0.368335000  |
| H  | 9.889311000  | 1.719816000  | 1.266199000  |
| C  | -4.307915000 | -3.197943000 | -1.047518000 |
| C  | -1.682179000 | -1.224278000 | -1.079150000 |
| Ag | 5.398397000  | -0.890498000 | -0.187509000 |
| N  | 7.951302000  | 0.899350000  | 0.675732000  |
| H  | -6.443438000 | -2.521797000 | -3.387979000 |
| H  | -1.853297000 | -1.511662000 | -0.042662000 |
| O  | -4.915833000 | 0.390110000  | 2.627450000  |
| O  | -3.962279000 | 0.517989000  | 0.545894000  |
| O  | -5.088125000 | -3.961340000 | -1.589660000 |
| H  | -1.147590000 | -0.273648000 | -1.120163000 |
| C  | -4.101018000 | -1.814261000 | -1.701623000 |
| N  | -3.006112000 | -1.015539000 | -1.741510000 |
| O  | -0.612196000 | 3.944635000  | -0.153879000 |
| H  | -2.073634000 | 5.264085000  | -1.988264000 |
| C  | -4.509148000 | 1.070162000  | 1.481077000  |
| N  | -5.073136000 | -1.206530000 | -2.430912000 |
| C  | -3.305690000 | 0.121089000  | -2.506368000 |
| C  | -6.458086000 | -1.710185000 | -2.658336000 |
| H  | -2.570727000 | 0.905581000  | -2.631247000 |

|   |              |              |              |
|---|--------------|--------------|--------------|
| H | -2.840697000 | 3.672105000  | -1.934438000 |
| H | -7.052326000 | -0.879714000 | -3.036156000 |
| C | -4.574115000 | 0.004852000  | -2.930838000 |
| C | 7.167271000  | 2.152068000  | 0.683390000  |
| C | -2.688525000 | 4.597474000  | -1.390795000 |
| H | -5.185742000 | 0.659791000  | -3.535148000 |
| C | -1.993641000 | 4.343349000  | -0.030628000 |
| H | -6.872512000 | -2.065173000 | -1.714026000 |
| H | 7.159489000  | 2.578536000  | 1.687123000  |
| H | 6.148404000  | 1.927671000  | 0.376068000  |
| H | 7.608013000  | 2.867347000  | -0.011761000 |
| H | -1.949064000 | 5.294578000  | 0.514773000  |
| C | -4.892273000 | 2.580219000  | 1.577627000  |
| H | -3.651647000 | 5.067090000  | -1.220591000 |
| H | -6.993699000 | 2.210923000  | 1.972953000  |
| H | -4.674337000 | 2.895490000  | 2.605850000  |
| H | -6.625500000 | 2.480324000  | 0.262388000  |
| C | -2.772163000 | 3.342437000  | 0.883839000  |
| C | -6.394448000 | 2.790415000  | 1.276958000  |
| O | -4.144695000 | 3.368401000  | 0.632925000  |
| O | -2.268817000 | 2.638108000  | 1.736286000  |
| H | -6.643715000 | 3.841408000  | 1.386538000  |
| C | -0.425101000 | 2.672213000  | -0.679301000 |
| O | -1.335698000 | 1.945196000  | -1.031096000 |
| O | 1.138460000  | 0.889168000  | -0.848408000 |
| C | 2.401191000  | 0.357339000  | -0.573730000 |
| O | 3.358031000  | 1.068362000  | -0.323208000 |
| C | 2.426850000  | -1.207405000 | -0.616130000 |
| H | 1.751614000  | -1.496723000 | -1.444884000 |
| O | 3.696928000  | -1.701175000 | -0.840479000 |
| C | 1.789273000  | -1.718645000 | 0.714812000  |
| H | 1.772046000  | -2.804021000 | 0.709337000  |
| H | 2.387079000  | -1.389187000 | 1.561233000  |
| H | 0.775521000  | -1.349087000 | 0.839143000  |
| C | 1.089625000  | 2.327255000  | -0.764201000 |
| H | 1.575803000  | 2.685203000  | 0.151428000  |
| C | 1.731011000  | 3.027746000  | -1.990264000 |
| H | 1.576748000  | 4.099983000  | -1.917910000 |
| H | 2.797458000  | 2.827786000  | -2.011349000 |
| H | 1.284904000  | 2.665432000  | -2.911641000 |

**Table S16:** HF/STO-3G, LANL1MB level optimized coordinates of **5**<sub>HF</sub>.

Ground state electronic energy = -2733.62293275 Hartree/Particle.

|    |              |              |              |
|----|--------------|--------------|--------------|
| H  | -5.857217000 | -4.722355000 | -2.473608000 |
| H  | -6.047642000 | -3.296214000 | -3.523633000 |
| H  | 4.254430000  | -6.930765000 | -1.826654000 |
| C  | -5.743914000 | -3.639395000 | -2.533790000 |
| H  | 4.774054000  | -6.449627000 | -0.204763000 |
| H  | -8.518286000 | -3.798345000 | -2.095234000 |
| H  | -4.703247000 | -3.373292000 | -2.361298000 |
| H  | 4.911576000  | -3.950152000 | -3.425175000 |
| C  | 3.930191000  | -6.779385000 | -0.801645000 |
| H  | 3.569635000  | -7.722223000 | -0.403423000 |
| O  | 4.423396000  | -3.954493000 | 0.367656000  |
| C  | -7.977052000 | -3.166470000 | -1.406963000 |
| N  | -6.576538000 | -2.991338000 | -1.498428000 |
| O  | 3.127053000  | -4.507323000 | -1.446799000 |
| C  | 4.098092000  | -3.747420000 | -0.784241000 |
| H  | 3.773028000  | -2.114733000 | -2.154918000 |
| C  | 5.501641000  | -3.238134000 | -2.856256000 |
| C  | 2.786785000  | -5.735742000 | -0.773751000 |
| H  | 6.369970000  | -3.742139000 | -2.442510000 |
| H  | 1.940786000  | -6.136407000 | -1.343417000 |
| H  | -0.348953000 | -5.127351000 | -1.067677000 |
| C  | 4.642290000  | -2.627814000 | -1.724165000 |
| H  | 5.839350000  | -2.447594000 | -3.519231000 |
| C  | -8.392476000 | -2.434728000 | -0.374565000 |
| C  | -6.125224000 | -2.149105000 | -0.523340000 |
| H  | -9.377877000 | -2.284801000 | 0.040918000  |
| C  | 2.303649000  | -5.504391000 | 0.694147000  |
| C  | 0.011553000  | -4.098238000 | -1.080154000 |
| Ag | -4.051139000 | -1.420572000 | -0.137867000 |
| N  | -7.249414000 | -1.805470000 | 0.170734000  |
| H  | 2.095410000  | -4.769031000 | 3.863019000  |
| H  | 0.838860000  | -4.002217000 | -1.783761000 |
| O  | 5.472873000  | -1.710191000 | -0.995286000 |
| O  | 2.793651000  | 5.757744000  | 0.812855000  |
| O  | 2.595373000  | -6.259847000 | 1.606350000  |
| H  | -0.799077000 | -3.436295000 | -1.376833000 |
| C  | 1.432881000  | -4.280716000 | 1.006921000  |
| N  | 0.445144000  | -3.687503000 | 0.278172000  |
| O  | -2.403381000 | 5.268668000  | -0.338507000 |
| H  | -2.504789000 | 7.973954000  | 0.006344000  |
| C  | 2.729488000  | 5.252995000  | -0.289911000 |
| N  | 1.495678000  | -3.618655000 | 2.180664000  |
| C  | -0.148710000 | -2.616607000 | 0.991300000  |
| C  | 2.434571000  | -3.899059000 | 3.298074000  |
| H  | -1.142012000 | -1.846770000 | 0.522969000  |

|   |              |              |              |
|---|--------------|--------------|--------------|
| H | -1.078537000 | 7.488513000  | 0.933301000  |
| H | 2.452547000  | -3.023536000 | 3.944655000  |
| C | 0.525886000  | -2.597781000 | 2.164870000  |
| C | -7.300334000 | -0.905507000 | 1.343767000  |
| C | -1.486555000 | 7.603476000  | -0.064655000 |
| H | 0.432969000  | -1.949269000 | 3.020575000  |
| C | -1.480024000 | 6.259099000  | -0.834947000 |
| H | 3.431964000  | -4.084472000 | 2.898575000  |
| H | -7.996609000 | -0.089181000 | 1.149754000  |
| H | -6.306449000 | -0.498696000 | 1.517837000  |
| H | -7.626227000 | -1.461023000 | 2.224078000  |
| H | -1.816752000 | 6.451722000  | -1.861223000 |
| C | 2.185686000  | 5.942141000  | -1.583043000 |
| H | -0.887273000 | 8.324400000  | -0.611382000 |
| H | 4.111716000  | 6.655303000  | -2.285604000 |
| H | 2.109696000  | 5.165246000  | -2.353335000 |
| H | 3.242850000  | 7.814745000  | -1.270123000 |
| C | -0.057889000 | 5.623280000  | -0.940400000 |
| C | 3.135022000  | 7.067858000  | -2.050953000 |
| O | 0.894410000  | 6.547495000  | -1.354730000 |
| O | 0.193941000  | 4.455460000  | -0.714411000 |
| H | 2.730839000  | 7.542913000  | -2.939654000 |
| C | -2.096246000 | 4.768951000  | 0.926175000  |
| O | -1.296157000 | 5.261486000  | 1.694790000  |
| O | -1.948016000 | 2.412219000  | 0.882039000  |
| C | -2.506990000 | 1.198698000  | 0.562036000  |
| O | -3.710959000 | 0.977064000  | 0.588145000  |
| C | -1.429309000 | 0.161120000  | 0.140755000  |
| H | -0.614826000 | 0.232307000  | 0.877474000  |
| O | -1.970903000 | -1.145421000 | 0.162607000  |
| C | -0.873935000 | 0.555905000  | -1.254704000 |
| H | -0.092486000 | -0.137895000 | -1.547953000 |
| H | -1.667279000 | 0.522542000  | -1.998384000 |
| H | -0.459886000 | 1.559680000  | -1.225105000 |
| C | -2.898794000 | 3.459351000  | 1.198791000  |
| H | -3.754632000 | 3.412907000  | 0.515946000  |
| C | -3.368834000 | 3.375615000  | 2.668541000  |
| H | -4.070795000 | 4.178087000  | 2.872881000  |
| H | -3.862664000 | 2.426057000  | 2.851529000  |
| H | -2.518914000 | 3.473584000  | 3.336951000  |
| O | 3.556398000  | -1.035820000 | 0.076859000  |
| O | 3.164939000  | 3.961627000  | -0.583163000 |
| H | 1.993411000  | 3.643944000  | 1.956060000  |
| C | 4.749404000  | -0.905996000 | -0.114078000 |
| H | 1.720874000  | 2.235532000  | 0.924878000  |
| C | 2.464718000  | 2.781137000  | 1.497080000  |

|   |             |              |              |
|---|-------------|--------------|--------------|
| C | 3.623849000 | 3.237002000  | 0.573778000  |
| H | 4.332235000 | 3.839274000  | 1.157211000  |
| C | 5.698045000 | 0.129358000  | 0.566804000  |
| H | 2.858798000 | 2.137500000  | 2.277005000  |
| H | 6.990361000 | -1.370650000 | 1.456983000  |
| H | 6.435074000 | 0.431830000  | -0.187272000 |
| H | 5.700586000 | -0.809326000 | 2.531023000  |
| C | 4.383288000 | 2.003033000  | 0.008279000  |
| C | 6.420908000 | -0.503653000 | 1.778330000  |
| O | 4.957880000 | 1.265027000  | 1.047247000  |
| O | 4.475975000 | 1.680957000  | -1.158423000 |
| H | 7.099099000 | 0.221473000  | 2.217639000  |

**Table S17:** B3LYP/6-31G\*, SDD level optimized coordinates of **1**.

Ground state electronic energy = -756.5363493 Hartree/Particle.

|    |              |              |              |
|----|--------------|--------------|--------------|
| C  | 2.114387000  | -0.000022000 | 0.000017000  |
| N  | 2.946550000  | -0.761294000 | -0.760081000 |
| N  | 2.946539000  | 0.761282000  | 0.760093000  |
| C  | 4.273401000  | -0.480476000 | -0.479756000 |
| H  | 5.089032000  | -0.980634000 | -0.979150000 |
| C  | 4.273393000  | 0.480520000  | 0.479728000  |
| H  | 5.089018000  | 0.980705000  | 0.979107000  |
| N  | -2.946577000 | -0.760488000 | 0.760862000  |
| N  | -2.946516000 | 0.760476000  | -0.760927000 |
| C  | -2.114390000 | -0.000018000 | -0.000010000 |
| C  | -4.273418000 | -0.479970000 | 0.480190000  |
| H  | -5.089066000 | -0.979600000 | 0.980085000  |
| C  | -4.273378000 | 0.480007000  | -0.480313000 |
| H  | -5.088986000 | 0.979641000  | -0.980270000 |
| Ag | -0.000003000 | -0.000014000 | 0.000011000  |
| C  | 2.523769000  | 1.751536000  | 1.748842000  |
| H  | 2.901469000  | 2.740215000  | 1.474268000  |
| H  | 1.433962000  | 1.777083000  | 1.774275000  |
| H  | 2.901380000  | 1.478417000  | 2.737957000  |
| C  | 2.523807000  | -1.751570000 | -1.748815000 |
| H  | 1.434001000  | -1.776800000 | -1.774583000 |
| H  | 2.901799000  | -1.478696000 | -2.737854000 |
| H  | 2.901138000  | -2.740320000 | -1.473987000 |
| C  | -2.523698000 | 1.749673000  | -1.750714000 |
| H  | -1.433890000 | 1.775124000  | -1.776208000 |
| H  | -2.901360000 | 1.475554000  | -2.739532000 |
| H  | -2.901323000 | 2.738661000  | -1.477152000 |

|   |              |              |             |
|---|--------------|--------------|-------------|
| C | -2.523857000 | -1.749590000 | 1.750783000 |
| H | -1.434052000 | -1.775736000 | 1.775665000 |
| H | -2.900784000 | -1.474883000 | 2.739724000 |
| H | -2.902276000 | -2.738427000 | 1.477782000 |

**Table S18:** B3LYP/6-31G\*, SDD level optimized coordinates of LL.

Ground state electronic energy = -534.360449782 Hartree/Particle.

|   |              |              |              |
|---|--------------|--------------|--------------|
| O | -0.257716000 | 1.353781000  | -0.108355000 |
| C | -1.264781000 | 0.465326000  | 0.436720000  |
| H | -2.737785000 | 2.031288000  | 0.416977000  |
| H | -1.162658000 | 0.466529000  | 1.532783000  |
| C | -2.622715000 | 1.012180000  | 0.038509000  |
| H | -3.410244000 | 0.378994000  | 0.453118000  |
| H | -2.724450000 | 1.021068000  | -1.049847000 |
| C | -1.038493000 | -0.965338000 | -0.055233000 |
| O | -1.923921000 | -1.716041000 | -0.376100000 |
| O | 0.257632000  | -1.353784000 | -0.107431000 |
| C | 1.264766000  | -0.465361000 | 0.436569000  |
| H | 1.163103000  | -0.465397000 | 1.532767000  |
| C | 2.622631000  | -1.012455000 | 0.038242000  |
| H | 2.723260000  | -1.023005000 | -1.050212000 |
| H | 2.738184000  | -2.031021000 | 0.418002000  |
| H | 3.410294000  | -0.378429000 | 0.451191000  |
| C | 1.038523000  | 0.965284000  | -0.055870000 |
| O | 1.924093000  | 1.716312000  | -0.375414000 |

**Table S19:** B3LYP/6-31G\*, SDD level optimized coordinates of [1 +LL].

Ground state electronic energy = -1290.89487660 Hartree/Particle.

|   |              |              |              |
|---|--------------|--------------|--------------|
| O | -2.494545000 | -1.183538000 | -0.729833000 |
| C | -3.881675000 | -1.258921000 | -1.164040000 |
| C | -4.845648000 | -0.404108000 | -0.346052000 |
| O | -4.452022000 | 0.013341000  | 0.878295000  |
| C | -3.286738000 | -0.544665000 | 1.514055000  |
| C | -2.174149000 | -0.913041000 | 0.541597000  |
| O | -5.918048000 | -0.090768000 | -0.792129000 |
| O | -1.015431000 | -0.962740000 | 0.903982000  |
| C | -4.332956000 | -2.715902000 | -1.259637000 |

|    |              |              |              |
|----|--------------|--------------|--------------|
| H  | -3.869907000 | -0.820158000 | -2.164061000 |
| H  | -5.341694000 | -2.750501000 | -1.680102000 |
| H  | -4.347698000 | -3.203201000 | -0.279915000 |
| H  | -3.655733000 | -3.269754000 | -1.915667000 |
| C  | -3.667095000 | -1.715409000 | 2.425465000  |
| H  | -4.060605000 | -2.562412000 | 1.855467000  |
| H  | -4.436237000 | -1.385838000 | 3.128959000  |
| H  | -2.789140000 | -2.048010000 | 2.986750000  |
| H  | -2.893145000 | 0.269504000  | 2.126742000  |
| C  | 2.959049000  | -1.262715000 | -0.054376000 |
| N  | 2.596883000  | -2.550942000 | -0.293439000 |
| N  | 4.297461000  | -1.324704000 | 0.186321000  |
| C  | 3.687324000  | -3.399903000 | -0.207383000 |
| H  | 3.605308000  | -4.464029000 | -0.367034000 |
| C  | 4.761018000  | -2.626858000 | 0.098442000  |
| H  | 5.795261000  | -2.886043000 | 0.265193000  |
| N  | 0.324400000  | 3.097770000  | 0.891572000  |
| N  | 0.191064000  | 2.941433000  | -1.248318000 |
| C  | 0.669346000  | 2.295403000  | -0.151116000 |
| C  | -0.352216000 | 4.225144000  | 0.453467000  |
| H  | -0.710738000 | 4.985509000  | 1.130313000  |
| C  | -0.437120000 | 4.126034000  | -0.897932000 |
| H  | -0.885855000 | 4.782070000  | -1.628052000 |
| Ag | 1.742457000  | 0.469352000  | -0.080945000 |
| C  | 5.151458000  | -0.187460000 | 0.520128000  |
| H  | 5.986572000  | -0.129056000 | -0.183224000 |
| H  | 4.558967000  | 0.725292000  | 0.450546000  |
| H  | 5.539271000  | -0.291399000 | 1.537618000  |
| C  | 1.250363000  | -2.994164000 | -0.656394000 |
| H  | 0.520611000  | -2.269666000 | -0.293279000 |
| H  | 1.166790000  | -3.097493000 | -1.742819000 |
| H  | 1.056804000  | -3.962072000 | -0.187609000 |
| C  | 0.322798000  | 2.473169000  | -2.626211000 |
| H  | 0.782860000  | 1.484655000  | -2.614807000 |
| H  | -0.663233000 | 2.407021000  | -3.094026000 |
| H  | 0.952281000  | 3.159037000  | -3.200279000 |
| C  | 0.642965000  | 2.838240000  | 2.293908000  |
| H  | 1.025200000  | 1.820839000  | 2.382336000  |
| H  | 1.399100000  | 3.544579000  | 2.649073000  |
| H  | -0.259173000 | 2.937282000  | 2.903273000  |

**Table S20:** B3LYP/6-31G\*, SDD level optimized coordinates of  $\text{TS}_1([\mathbf{1}+\text{LL}]\rightarrow\mathbf{2})$ .

Ground state electronic energy = -1290.84942799 Hartree/Particle.

Calculated imaginary frequency along the bond C2...C3 is i67.

|    |              |              |              |
|----|--------------|--------------|--------------|
| O  | -1.143110000 | -1.273287000 | -0.433207000 |
| C  | -2.318602000 | -1.766131000 | -1.134562000 |
| C  | -3.626118000 | -1.717782000 | -0.348071000 |
| O  | -3.613413000 | -1.386398000 | 0.963291000  |
| C  | -2.410891000 | -0.982456000 | 1.632929000  |
| C  | -1.303291000 | -0.560455000 | 0.688569000  |
| O  | -4.662572000 | -1.995362000 | -0.893214000 |
| O  | -0.306119000 | 0.013787000  | 1.173528000  |
| C  | -2.019823000 | -3.179080000 | -1.625941000 |
| H  | -2.463192000 | -1.089163000 | -1.981647000 |
| H  | -2.863643000 | -3.535008000 | -2.221431000 |
| H  | -1.866487000 | -3.865869000 | -0.787583000 |
| H  | -1.120079000 | -3.176617000 | -2.248193000 |
| C  | -1.927785000 | -2.126836000 | 2.532856000  |
| H  | -1.614031000 | -2.992034000 | 1.939986000  |
| H  | -2.748673000 | -2.434111000 | 3.186269000  |
| H  | -1.088355000 | -1.793764000 | 3.149396000  |
| H  | -2.678826000 | -0.117948000 | 2.241022000  |
| C  | 3.730560000  | 0.036502000  | -0.009350000 |
| N  | 4.713420000  | 0.757216000  | 0.591846000  |
| N  | 4.361817000  | -0.662590000 | -0.988890000 |
| C  | 5.939908000  | 0.512386000  | -0.003305000 |
| H  | 6.849285000  | 0.988357000  | 0.330215000  |
| C  | 5.718486000  | -0.382850000 | -0.999917000 |
| H  | 6.397234000  | -0.839389000 | -1.703926000 |
| N  | -1.959795000 | 2.100962000  | -1.231397000 |
| N  | -3.631085000 | 2.084694000  | 0.102642000  |
| C  | -2.587529000 | 1.309404000  | -0.312627000 |
| C  | -2.588462000 | 3.330988000  | -1.379702000 |
| H  | -2.243415000 | 4.083392000  | -2.072672000 |
| C  | -3.646280000 | 3.319526000  | -0.532712000 |
| H  | -4.403604000 | 4.063287000  | -0.336470000 |
| Ag | 1.709027000  | 0.003159000  | 0.490261000  |
| C  | 3.722936000  | -1.597436000 | -1.913143000 |
| H  | 2.657635000  | -1.640900000 | -1.684444000 |
| H  | 3.859388000  | -1.257877000 | -2.943539000 |
| H  | 4.157247000  | -2.594000000 | -1.796476000 |
| C  | 4.531966000  | 1.671154000  | 1.719099000  |
| H  | 3.481409000  | 1.663817000  | 2.010983000  |
| H  | 5.142518000  | 1.344947000  | 2.565199000  |
| H  | 4.819626000  | 2.685335000  | 1.429149000  |
| C  | -4.624236000 | 1.708588000  | 1.108397000  |
| H  | -5.587231000 | 2.150234000  | 0.841909000  |
| H  | -4.730269000 | 0.625250000  | 1.128482000  |



|   |              |             |              |
|---|--------------|-------------|--------------|
| H | -4.330069000 | 2.074908000 | 2.097765000  |
| C | -0.776080000 | 1.724343000 | -1.993398000 |
| H | 0.078042000  | 2.348689000 | -1.709631000 |
| H | -0.542442000 | 0.680711000 | -1.789355000 |
| H | -0.963702000 | 1.848197000 | -3.064585000 |

**Table S21:** B3LYP/6-31G\*, SDD level optimized coordinates of **I**([1+LL]→2).

Ground state electronic energy = -1290.88262309 Hartree/Particle.

|    |              |              |              |
|----|--------------|--------------|--------------|
| O  | 1.570407000  | 0.868891000  | -1.099578000 |
| C  | 1.037644000  | 2.202371000  | -1.014222000 |
| C  | 0.112354000  | 2.364066000  | 0.192478000  |
| O  | 0.586543000  | 1.849570000  | 1.352027000  |
| C  | 1.850889000  | 1.152464000  | 1.307949000  |
| C  | 1.769247000  | 0.116786000  | 0.134619000  |
| O  | -0.961832000 | 2.917441000  | 0.165086000  |
| O  | 0.859256000  | -0.835797000 | 0.326203000  |
| C  | 0.338924000  | 2.521033000  | -2.325675000 |
| H  | 1.868911000  | 2.913989000  | -0.862575000 |
| H  | -0.027971000 | 3.550354000  | -2.316266000 |
| H  | -0.509912000 | 1.849046000  | -2.477886000 |
| H  | 1.038379000  | 2.399461000  | -3.157908000 |
| C  | 2.053848000  | 0.536244000  | 2.679482000  |
| H  | 1.275930000  | -0.205761000 | 2.876801000  |
| H  | 2.003019000  | 1.313688000  | 3.446852000  |
| H  | 3.036826000  | 0.057194000  | 2.749107000  |
| H  | 2.641545000  | 1.888990000  | 1.106823000  |
| C  | -3.283964000 | -0.509413000 | -0.061415000 |
| N  | -4.113474000 | -1.263003000 | -0.832023000 |
| N  | -4.107500000 | 0.350537000  | 0.593055000  |
| C  | -5.434200000 | -0.881960000 | -0.659444000 |
| H  | -6.246977000 | -1.354378000 | -1.189130000 |
| C  | -5.428784000 | 0.134439000  | 0.241448000  |
| H  | -6.237869000 | 0.717285000  | 0.653675000  |
| N  | 3.460316000  | -1.823475000 | 0.297290000  |
| N  | 4.243819000  | -0.043851000 | -0.677270000 |
| C  | 3.144070000  | -0.564765000 | -0.081676000 |
| C  | 4.763235000  | -2.096815000 | -0.070722000 |
| H  | 5.222067000  | -3.051744000 | 0.130996000  |
| C  | 5.253668000  | -0.986595000 | -0.680157000 |
| H  | 6.220768000  | -0.786220000 | -1.113710000 |
| Ag | -1.214434000 | -0.628607000 | 0.105345000  |

|   |              |              |              |
|---|--------------|--------------|--------------|
| C | -3.671830000 | 1.345581000  | 1.577807000  |
| H | -3.477024000 | 0.863760000  | 2.540199000  |
| H | -2.771801000 | 1.851389000  | 1.224426000  |
| H | -4.467456000 | 2.082733000  | 1.701060000  |
| C | -3.691933000 | -2.330209000 | -1.735088000 |
| H | -2.605627000 | -2.413355000 | -1.690153000 |
| H | -4.141055000 | -3.279761000 | -1.430403000 |
| H | -3.994312000 | -2.096170000 | -2.759705000 |
| C | 4.391533000  | 1.278856000  | -1.301166000 |
| H | 3.756501000  | 1.344085000  | -2.183292000 |
| H | 4.124835000  | 2.065899000  | -0.595333000 |
| H | 5.439425000  | 1.396900000  | -1.578694000 |
| C | 2.609139000  | -2.829104000 | 0.961852000  |
| H | 3.272744000  | -3.607194000 | 1.342869000  |
| H | 2.053127000  | -2.369925000 | 1.773678000  |
| H | 1.904170000  | -3.245935000 | 0.243677000  |

**Table S22:** B3LYP/6-31G\*, SDD level optimized coordinates of **TS<sub>2</sub>([1+LL]→2)**.

Ground state electronic energy = -1290.85755148 Hartree/Particle.

Calculated imaginary frequency along the bond C3...O2 is i26.

|   |              |              |              |
|---|--------------|--------------|--------------|
| O | 0.847938000  | 0.606275000  | -1.041555000 |
| C | 0.820664000  | 2.004046000  | -1.306274000 |
| C | 0.460731000  | 2.708892000  | 0.006921000  |
| O | 1.308214000  | 2.485948000  | 1.054722000  |
| C | 2.393206000  | 1.566315000  | 0.920942000  |
| C | 1.838295000  | 0.141696000  | 0.741881000  |
| O | -0.525538000 | 3.382066000  | 0.186985000  |
| O | 0.932771000  | -0.285542000 | 1.459063000  |
| C | -0.133206000 | 2.378141000  | -2.436026000 |
| H | 1.831045000  | 2.336823000  | -1.604626000 |
| H | -0.098775000 | 3.455260000  | -2.628056000 |
| H | -1.166718000 | 2.116898000  | -2.185778000 |
| H | 0.154356000  | 1.846010000  | -3.348434000 |
| C | 3.200009000  | 1.662330000  | 2.215047000  |
| H | 2.569336000  | 1.392987000  | 3.066691000  |
| H | 3.555080000  | 2.687349000  | 2.351183000  |
| H | 4.071162000  | 0.997438000  | 2.186254000  |
| H | 3.025090000  | 1.846237000  | 0.070888000  |
| C | -3.084551000 | -0.573034000 | 0.043466000  |
| N | -3.901038000 | -1.569051000 | -0.391484000 |
| N | -3.838149000 | 0.128713000  | 0.930614000  |
| C | -5.144227000 | -1.493570000 | 0.216639000  |

|    |              |              |              |
|----|--------------|--------------|--------------|
| H  | -5.938678000 | -2.190651000 | -0.001330000 |
| C  | -5.102628000 | -0.423493000 | 1.051606000  |
| H  | -5.852981000 | -0.010070000 | 1.707852000  |
| N  | 2.988296000  | -2.090800000 | 0.828929000  |
| N  | 3.557815000  | -0.937037000 | -0.928391000 |
| C  | 2.779051000  | -0.918146000 | 0.179388000  |
| C  | 3.896334000  | -2.847155000 | 0.121800000  |
| H  | 4.210234000  | -3.823068000 | 0.457389000  |
| C  | 4.250227000  | -2.128073000 | -0.978103000 |
| H  | 4.923828000  | -2.361652000 | -1.787631000 |
| Ag | -1.115290000 | -0.119237000 | -0.488961000 |
| C  | -3.381050000 | 1.288971000  | 1.699590000  |
| H  | -3.099413000 | 0.985235000  | 2.711953000  |
| H  | -2.520557000 | 1.740634000  | 1.204595000  |
| H  | -4.186374000 | 2.025213000  | 1.749983000  |
| C  | -3.543778000 | -2.578384000 | -1.383750000 |
| H  | -2.517767000 | -2.397535000 | -1.705875000 |
| H  | -3.616965000 | -3.578632000 | -0.947248000 |
| H  | -4.210196000 | -2.509035000 | -2.248133000 |
| C  | 3.624407000  | 0.074980000  | -1.992501000 |
| H  | 2.602538000  | 0.342783000  | -2.258859000 |
| H  | 4.182551000  | 0.949501000  | -1.650384000 |
| H  | 4.143170000  | -0.368235000 | -2.842828000 |
| C  | 2.376822000  | -2.549905000 | 2.090224000  |
| H  | 2.978658000  | -3.382700000 | 2.456210000  |
| H  | 2.372247000  | -1.742367000 | 2.819338000  |
| H  | 1.350391000  | -2.868717000 | 1.911517000  |

**Table S23:** B3LYP/6-31G\*, SDD level optimized coordinates of **2**.

Ground state electronic energy = -1290.85758134 Hartree/Particle.

|   |              |              |              |
|---|--------------|--------------|--------------|
| O | 0.815733000  | 0.624201000  | -1.064385000 |
| C | 0.806676000  | 2.022520000  | -1.311360000 |
| C | 0.496717000  | 2.717550000  | 0.020252000  |
| O | 1.382620000  | 2.490738000  | 1.038292000  |
| C | 2.453090000  | 1.562670000  | 0.873924000  |
| C | 1.884933000  | 0.138016000  | 0.774257000  |
| O | -0.482281000 | 3.387851000  | 0.243701000  |
| O | 0.983107000  | -0.248638000 | 1.511001000  |
| C | -0.168457000 | 2.437699000  | -2.409096000 |
| H | 1.815433000  | 2.340140000  | -1.633769000 |
| H | -0.112316000 | 3.516245000  | -2.588638000 |

|    |              |              |              |
|----|--------------|--------------|--------------|
| H  | -1.200958000 | 2.198712000  | -2.133573000 |
| H  | 0.080958000  | 1.910858000  | -3.335738000 |
| C  | 3.330874000  | 1.691649000  | 2.119790000  |
| H  | 2.746026000  | 1.457496000  | 3.013565000  |
| H  | 3.700395000  | 2.717335000  | 2.201574000  |
| H  | 4.194021000  | 1.017993000  | 2.066061000  |
| H  | 3.040894000  | 1.808465000  | -0.016490000 |
| C  | -3.085060000 | -0.565654000 | 0.056582000  |
| N  | -3.910431000 | -1.542922000 | -0.403850000 |
| N  | -3.820828000 | 0.097692000  | 0.987147000  |
| C  | -5.141069000 | -1.494103000 | 0.231803000  |
| H  | -5.939833000 | -2.181953000 | 0.000627000  |
| C  | -5.082823000 | -0.459859000 | 1.109871000  |
| H  | -5.820506000 | -0.073930000 | 1.796539000  |
| N  | 2.960708000  | -2.128659000 | 0.840014000  |
| N  | 3.514890000  | -1.001231000 | -0.940279000 |
| C  | 2.771237000  | -0.952329000 | 0.190391000  |
| C  | 3.822232000  | -2.916676000 | 0.110711000  |
| H  | 4.114870000  | -3.900655000 | 0.442047000  |
| C  | 4.166006000  | -2.214035000 | -1.003581000 |
| H  | 4.806626000  | -2.473391000 | -1.831826000 |
| Ag | -1.132427000 | -0.087183000 | -0.506673000 |
| C  | -3.351554000 | 1.230539000  | 1.788748000  |
| H  | -3.078996000 | 0.896082000  | 2.793873000  |
| H  | -2.482258000 | 1.681747000  | 1.309017000  |
| H  | -4.146021000 | 1.977357000  | 1.855297000  |
| C  | -3.571034000 | -2.512047000 | -1.441486000 |
| H  | -2.568737000 | -2.287929000 | -1.808086000 |
| H  | -3.591095000 | -3.526662000 | -1.033079000 |
| H  | -4.281594000 | -2.439042000 | -2.269480000 |
| C  | 3.576208000  | 0.001564000  | -2.014361000 |
| H  | 2.554326000  | 0.318746000  | -2.224105000 |
| H  | 4.199127000  | 0.845763000  | -1.709854000 |
| H  | 4.022082000  | -0.473425000 | -2.888636000 |
| C  | 2.370402000  | -2.560047000 | 2.120877000  |
| H  | 2.946978000  | -3.417497000 | 2.469950000  |
| H  | 2.424640000  | -1.752739000 | 2.848669000  |
| H  | 1.325950000  | -2.834224000 | 1.975629000  |

**Table S24:** B3LYP/6-31G\*, SDD level optimized coordinates of [2+LL].

Ground state electronic energy = -1825.22325848 Hartree/Particle.

|    |              |              |              |
|----|--------------|--------------|--------------|
| O  | 0.090230000  | 0.798415000  | 1.104143000  |
| C  | 0.583704000  | 1.327606000  | 2.319202000  |
| C  | 1.868066000  | 2.113926000  | 2.012001000  |
| O  | 1.753939000  | 3.204075000  | 1.187613000  |
| C  | 0.524234000  | 3.522555000  | 0.548213000  |
| C  | 0.284169000  | 2.542548000  | -0.606420000 |
| O  | 2.971409000  | 1.812834000  | 2.400496000  |
| O  | 1.202990000  | 2.091446000  | -1.270777000 |
| C  | 0.837119000  | 0.274550000  | 3.397398000  |
| H  | -0.154855000 | 2.042335000  | 2.732267000  |
| H  | 1.201212000  | 0.736644000  | 4.320867000  |
| H  | 1.585603000  | -0.453286000 | 3.067439000  |
| H  | -0.096415000 | -0.254278000 | 3.616476000  |
| C  | 0.676932000  | 4.942150000  | -0.008937000 |
| H  | 1.515115000  | 4.981383000  | -0.710229000 |
| H  | 0.877033000  | 5.633779000  | 0.813759000  |
| H  | -0.236016000 | 5.268026000  | -0.520682000 |
| H  | -0.301575000 | 3.498463000  | 1.262295000  |
| C  | 3.069739000  | -1.690915000 | -0.589574000 |
| N  | 4.371275000  | -1.292849000 | -0.611217000 |
| N  | 3.076497000  | -2.918679000 | -1.173364000 |
| C  | 5.173824000  | -2.253236000 | -1.203453000 |
| H  | 6.240574000  | -2.128921000 | -1.309066000 |
| C  | 4.357831000  | -3.278884000 | -1.557797000 |
| H  | 4.573841000  | -4.224109000 | -2.031544000 |
| N  | -1.311518000 | 2.240778000  | -2.517244000 |
| N  | -2.318793000 | 2.356279000  | -0.586718000 |
| C  | -1.103537000 | 2.385198000  | -1.183650000 |
| C  | -2.661135000 | 2.115486000  | -2.750533000 |
| H  | -3.058098000 | 1.989247000  | -3.745583000 |
| C  | -3.291968000 | 2.180793000  | -1.543031000 |
| H  | -4.331176000 | 2.063632000  | -1.278369000 |
| Ag | 1.493688000  | -0.563825000 | 0.204573000  |
| C  | 1.903654000  | -3.763229000 | -1.393667000 |
| H  | 1.651375000  | -3.785487000 | -2.458646000 |
| H  | 2.119882000  | -4.779830000 | -1.054704000 |
| H  | 1.061121000  | -3.373418000 | -0.824115000 |
| C  | 4.879873000  | -0.013012000 | -0.113515000 |
| H  | 4.155158000  | 0.431553000  | 0.568628000  |
| H  | 5.814265000  | -0.183179000 | 0.426667000  |
| H  | 5.060332000  | 0.672064000  | -0.947200000 |
| C  | -2.606941000 | 2.413036000  | 0.854971000  |
| H  | -1.858700000 | 1.803831000  | 1.360922000  |
| H  | -2.590368000 | 3.450303000  | 1.198148000  |
| H  | -3.595143000 | 1.983064000  | 1.010162000  |
| C  | -0.302143000 | 2.213217000  | -3.590908000 |

|   |              |              |              |
|---|--------------|--------------|--------------|
| H | 0.413593000  | 3.022094000  | -3.453166000 |
| H | 0.231087000  | 1.263041000  | -3.576969000 |
| H | -0.831298000 | 2.342133000  | -4.535805000 |
| C | -1.925190000 | -2.547223000 | 0.365950000  |
| O | -0.834728000 | -3.070603000 | 0.411076000  |
| C | -2.337683000 | -1.529966000 | 1.417614000  |
| H | -1.474826000 | -0.868413000 | 1.544678000  |
| C | -2.706151000 | -2.177010000 | 2.752314000  |
| H | -1.854817000 | -2.757613000 | 3.118702000  |
| H | -3.570162000 | -2.842391000 | 2.664951000  |
| H | -2.941885000 | -1.397561000 | 3.482445000  |
| C | -4.249768000 | -0.951270000 | -0.005050000 |
| O | -3.392711000 | -0.630880000 | 0.976501000  |
| O | -5.083107000 | -0.149284000 | -0.366420000 |
| C | -4.133370000 | -2.330699000 | -0.638123000 |
| H | -4.369419000 | -2.201953000 | -1.696067000 |
| C | -5.102922000 | -3.343017000 | -0.025915000 |
| H | -6.129649000 | -2.985038000 | -0.146769000 |
| H | -4.998948000 | -4.300369000 | -0.543707000 |
| H | -4.911462000 | -3.499782000 | 1.039425000  |
| O | -2.776897000 | -2.838568000 | -0.634243000 |

**Table S25:** B3LYP/6-31G\*, SDD level optimized coordinates of **TS<sub>1</sub>**([**2+LL**] $\rightarrow$ **3**).

Ground state electronic energy = -1825.19766527 Hartree/Particle.

Calculated imaginary frequency along the bond C4 $\cdots$ O2 is i174.

|   |              |              |              |
|---|--------------|--------------|--------------|
| O | 1.301600000  | 0.230558000  | 1.213082000  |
| C | 0.828034000  | -0.515948000 | 2.305841000  |
| C | -0.186223000 | -1.524675000 | 1.755224000  |
| O | 0.291091000  | -2.514108000 | 0.931948000  |
| C | 1.676538000  | -2.655268000 | 0.642743000  |
| C | 2.093790000  | -1.694008000 | -0.474095000 |
| O | -1.384921000 | -1.493526000 | 1.932416000  |
| O | 1.372344000  | -1.482931000 | -1.430278000 |
| C | 0.281374000  | 0.245121000  | 3.521523000  |
| H | 1.672205000  | -1.104499000 | 2.710063000  |
| H | 0.030290000  | -0.466568000 | 4.315916000  |
| H | -0.604401000 | 0.829931000  | 3.283321000  |
| H | 1.061934000  | 0.911057000  | 3.906451000  |
| C | 1.871986000  | -4.092089000 | 0.141550000  |
| H | 1.253020000  | -4.263435000 | -0.743451000 |
| H | 1.568922000  | -4.791337000 | 0.925303000  |
| H | 2.921194000  | -4.286210000 | -0.108480000 |

|    |              |              |              |
|----|--------------|--------------|--------------|
| H  | 2.278418000  | -2.506753000 | 1.540366000  |
| C  | -4.318128000 | -0.326339000 | -0.515685000 |
| N  | -4.754710000 | -1.609179000 | -0.408007000 |
| N  | -5.260555000 | 0.293334000  | -1.277386000 |
| C  | -5.950519000 | -1.785079000 | -1.084756000 |
| H  | -6.459048000 | -2.736315000 | -1.118462000 |
| C  | -6.270390000 | -0.585432000 | -1.633834000 |
| H  | -7.112289000 | -0.285536000 | -2.238671000 |
| N  | 4.160789000  | -1.239556000 | -1.810460000 |
| N  | 4.432363000  | -0.805262000 | 0.308944000  |
| C  | 3.538951000  | -1.258355000 | -0.602896000 |
| C  | 5.439066000  | -0.769214000 | -1.652778000 |
| H  | 6.118138000  | -0.666659000 | -2.484363000 |
| C  | 5.606587000  | -0.493002000 | -0.329180000 |
| H  | 6.450523000  | -0.082399000 | 0.201657000  |
| Ag | -2.593003000 | 0.529264000  | 0.298807000  |
| C  | -5.253442000 | 1.707900000  | -1.639287000 |
| H  | -5.470908000 | 1.824647000  | -2.703820000 |
| H  | -6.034131000 | 2.232991000  | -1.077702000 |
| H  | -4.289381000 | 2.139224000  | -1.371168000 |
| C  | -4.099697000 | -2.672021000 | 0.355972000  |
| H  | -3.123857000 | -2.325319000 | 0.696521000  |
| H  | -4.708739000 | -2.936918000 | 1.224945000  |
| H  | -3.963761000 | -3.548220000 | -0.284201000 |
| C  | 4.227436000  | -0.548097000 | 1.741648000  |
| H  | 3.642240000  | 0.369092000  | 1.840211000  |
| H  | 3.756219000  | -1.386609000 | 2.244077000  |
| H  | 5.206346000  | -0.317947000 | 2.165316000  |
| C  | 3.606254000  | -1.628973000 | -3.117572000 |
| H  | 2.983879000  | -2.515810000 | -3.013884000 |
| H  | 3.004719000  | -0.814822000 | -3.522575000 |
| H  | 4.446759000  | -1.845302000 | -3.777985000 |
| C  | 0.190913000  | 1.715116000  | 0.655268000  |
| O  | -0.953097000 | 1.601856000  | 1.167508000  |
| C  | 1.107160000  | 2.796294000  | 1.224978000  |
| H  | 1.236672000  | 2.603714000  | 2.288122000  |
| C  | 0.537472000  | 4.198303000  | 1.016204000  |
| H  | -0.406148000 | 4.292172000  | 1.560389000  |
| H  | 0.348569000  | 4.407600000  | -0.040882000 |
| H  | 1.243074000  | 4.941047000  | 1.399566000  |
| C  | 2.669250000  | 2.130585000  | -0.503520000 |
| O  | 2.449379000  | 2.720355000  | 0.675461000  |
| O  | 3.805158000  | 1.934929000  | -0.889516000 |
| C  | 1.488222000  | 1.748872000  | -1.388191000 |
| H  | 1.732754000  | 0.779465000  | -1.824905000 |
| C  | 1.298352000  | 2.772143000  | -2.512563000 |

|   |             |             |              |
|---|-------------|-------------|--------------|
| H | 2.210032000 | 2.836106000 | -3.113639000 |
| H | 0.470353000 | 2.454647000 | -3.153313000 |
| H | 1.070268000 | 3.766828000 | -2.118694000 |
| O | 0.242716000 | 1.571165000 | -0.698265000 |

**Table S26:** B3LYP/6-31G\*, SDD level optimized coordinates of **I**([2+LL]→3).

Ground state electronic energy = -1825.20779080 Hartree/Particle.

|   |              |              |             |
|---|--------------|--------------|-------------|
| H | 1.312206000  | 0.068244000  | 3.673867000 |
| O | -3.122666000 | 1.356788000  | 2.856100000 |
| O | -0.978182000 | 0.778784000  | 2.677471000 |
| C | -2.028470000 | 1.589022000  | 2.395931000 |
| H | -3.475412000 | 3.874543000  | 1.702444000 |
| C | 1.309551000  | 0.122469000  | 2.581180000 |
| H | 0.584415000  | 2.136531000  | 2.528922000 |
| H | 1.050194000  | -0.863171000 | 2.183861000 |
| H | -5.284777000 | -1.879696000 | 2.293696000 |
| H | 5.427412000  | -4.145570000 | 1.595780000 |
| H | 6.058442000  | -0.854535000 | 1.946901000 |
| H | 2.309926000  | 0.408380000  | 2.245313000 |
| H | -3.642360000 | -2.471380000 | 1.949876000 |
| C | 0.304785000  | 1.159217000  | 2.122578000 |
| H | -1.025992000 | 3.431381000  | 1.852410000 |
| H | -3.962512000 | -0.716204000 | 2.066072000 |
| H | 6.937138000  | -2.285741000 | 1.319470000 |
| C | -4.365143000 | -1.677809000 | 1.741851000 |
| C | -1.702188000 | 2.696066000  | 1.391463000 |
| C | -2.941832000 | 3.402033000  | 0.873439000 |
| C | 4.683470000  | -3.528585000 | 1.116157000 |
| C | 6.192984000  | -1.521099000 | 1.095306000 |
| H | -3.618707000 | 2.692125000  | 0.390066000 |
| H | 2.833184000  | -4.723167000 | 0.802835000 |
| C | 3.409539000  | -3.814863000 | 0.720625000 |
| N | 4.924549000  | -2.214314000 | 0.797206000 |
| H | -2.656809000 | 4.171405000  | 0.150467000 |
| H | 6.511757000  | -0.937540000 | 0.232510000 |
| C | 0.169217000  | 1.305309000  | 0.575135000 |
| H | -6.707074000 | -2.401246000 | 0.386537000 |
| O | -1.046860000 | 2.043038000  | 0.290009000 |
| N | -4.681412000 | -1.646723000 | 0.310001000 |
| N | 2.889418000  | -2.674590000 | 0.152543000 |
| O | 4.409287000  | 0.531342000  | 0.435211000 |



|    |              |              |              |
|----|--------------|--------------|--------------|
| C  | 3.822688000  | -1.695929000 | 0.200105000  |
| H  | 0.909583000  | -3.313344000 | 0.185976000  |
| O  | 1.310589000  | 2.092678000  | 0.226912000  |
| O  | 0.109881000  | 0.151005000  | -0.116503000 |
| H  | 1.101693000  | -1.579312000 | -0.178960000 |
| C  | -5.893177000 | -2.047134000 | -0.226964000 |
| Ag | -1.899157000 | -0.494618000 | -0.412810000 |
| C  | 1.508567000  | -2.581327000 | -0.357599000 |
| C  | 3.763162000  | -0.245413000 | -0.234829000 |
| C  | -3.826523000 | -1.242564000 | -0.666417000 |
| H  | 1.327074000  | 4.697093000  | -0.472782000 |
| H  | -0.273623000 | 4.030525000  | -0.903817000 |
| H  | 1.493538000  | -2.822637000 | -1.423200000 |
| C  | 1.348840000  | 2.631577000  | -1.105979000 |
| H  | 1.934133000  | 0.151940000  | -1.281675000 |
| C  | -5.798605000 | -1.887224000 | -1.572357000 |
| C  | 0.784762000  | 4.048016000  | -1.164640000 |
| C  | 3.009558000  | 0.176332000  | -1.503679000 |
| N  | -4.527822000 | -1.394631000 | -1.822098000 |
| C  | 2.824291000  | 2.656202000  | -1.544191000 |
| H  | 0.790528000  | 1.967497000  | -1.779032000 |
| O  | 3.439390000  | 3.671180000  | -1.729078000 |
| O  | 3.470653000  | 1.475647000  | -1.828554000 |
| H  | -6.513612000 | -2.070811000 | -2.359375000 |
| H  | 3.132430000  | -1.768137000 | -2.534689000 |
| H  | 0.898270000  | 4.461286000  | -2.171290000 |
| C  | 3.356867000  | -0.711581000 | -2.707808000 |
| H  | 4.418551000  | -0.612541000 | -2.953967000 |
| H  | -3.009145000 | -0.710407000 | -3.069130000 |
| C  | -4.037364000 | -1.062880000 | -3.156600000 |
| H  | -4.652293000 | -0.273475000 | -3.598061000 |
| H  | 2.778155000  | -0.377785000 | -3.572869000 |
| H  | -4.065667000 | -1.948085000 | -3.798447000 |

**Table S27:** B3LYP/6-31G\*, SDD level optimized coordinates of **TS<sub>2</sub>([2+LL]→3)**.

Ground state electronic energy = -1825.19107756 Hartree/Particle.

Calculated imaginary frequency along the bond C4...O6 is i92.

|   |              |              |              |
|---|--------------|--------------|--------------|
| O | -1.242432000 | -2.147285000 | 0.043081000  |
| C | 3.884206000  | 1.240016000  | -0.732618000 |
| N | 4.342048000  | 1.624758000  | -1.954420000 |
| N | 4.607735000  | 1.976966000  | 0.152312000  |
| C | 5.335899000  | 2.583840000  | -1.835155000 |

|    |              |              |              |
|----|--------------|--------------|--------------|
| H  | 5.833581000  | 3.012084000  | -2.691704000 |
| C  | 5.501424000  | 2.806473000  | -0.506126000 |
| H  | 6.168425000  | 3.471270000  | 0.021063000  |
| Ag | 2.477475000  | -0.223586000 | -0.244652000 |
| C  | 4.476886000  | 1.924584000  | 1.610116000  |
| H  | 5.459944000  | 1.762298000  | 2.059513000  |
| H  | 4.057628000  | 2.863630000  | 1.983262000  |
| H  | 3.820648000  | 1.099554000  | 1.889185000  |
| C  | 3.897824000  | 1.069219000  | -3.229140000 |
| H  | 4.698207000  | 0.480585000  | -3.687045000 |
| H  | 3.038576000  | 0.423649000  | -3.044029000 |
| H  | 3.607053000  | 1.876404000  | -3.907261000 |
| C  | -0.506519000 | -1.123100000 | 0.599506000  |
| O  | -0.367428000 | -0.032680000 | 0.008104000  |
| C  | -0.650864000 | -1.241077000 | 2.131999000  |
| H  | -0.747952000 | -2.301176000 | 2.380858000  |
| C  | -1.873283000 | -0.490598000 | 2.645061000  |
| H  | -1.929464000 | -0.582646000 | 3.733288000  |
| H  | -2.784950000 | -0.907886000 | 2.208402000  |
| H  | -1.794232000 | 0.572445000  | 2.393024000  |
| C  | 1.697688000  | -1.284397000 | 2.707142000  |
| O  | 0.479373000  | -0.678842000 | 2.815814000  |
| O  | 2.637886000  | -0.818919000 | 3.310517000  |
| C  | 1.766575000  | -2.424708000 | 1.686184000  |
| H  | 1.084461000  | -3.235590000 | 1.988170000  |
| C  | 3.166701000  | -3.011996000 | 1.565323000  |
| H  | 3.486986000  | -3.446164000 | 2.517906000  |
| H  | 3.166011000  | -3.795158000 | 0.801266000  |
| H  | 3.894594000  | -2.243163000 | 1.284827000  |
| O  | 1.294912000  | -1.856474000 | 0.473691000  |
| C  | -1.175326000 | -2.336447000 | -1.386245000 |
| C  | -2.619285000 | -2.470710000 | -1.902562000 |
| O  | -3.378164000 | -1.339504000 | -2.117238000 |
| C  | -3.063593000 | -0.025131000 | -1.695649000 |
| C  | -3.849572000 | 0.231423000  | -0.401814000 |
| O  | -4.466613000 | -0.641123000 | 0.170996000  |
| H  | -0.695162000 | -1.460212000 | -1.832088000 |
| H  | -0.314699000 | -3.749341000 | -2.777003000 |
| C  | -3.513663000 | 0.907287000  | -2.830616000 |
| H  | -4.557406000 | 0.703335000  | -3.087583000 |
| H  | -2.903687000 | 0.712271000  | -3.716297000 |
| H  | -3.415816000 | 1.966163000  | -2.572182000 |
| H  | -1.997409000 | 0.100722000  | -1.470107000 |
| N  | -5.082810000 | 2.016754000  | 0.852365000  |
| N  | -3.091400000 | 2.653827000  | 0.216802000  |
| C  | -3.971072000 | 1.623656000  | 0.180642000  |

|   |              |              |              |
|---|--------------|--------------|--------------|
| C | -4.902402000 | 3.300026000  | 1.304238000  |
| H | -5.664460000 | 3.822126000  | 1.861793000  |
| C | -3.655756000 | 3.695852000  | 0.914352000  |
| H | -3.126496000 | 4.620776000  | 1.082294000  |
| C | -1.715250000 | 2.694148000  | -0.316661000 |
| H | -1.188522000 | 1.765894000  | -0.073531000 |
| H | -1.742333000 | 2.853581000  | -1.396666000 |
| H | -1.209555000 | 3.535770000  | 0.157312000  |
| C | -6.308104000 | 1.231677000  | 1.100851000  |
| H | -6.620157000 | 0.726353000  | 0.187870000  |
| H | -6.118853000 | 0.487426000  | 1.874033000  |
| H | -7.082127000 | 1.929790000  | 1.420457000  |
| C | -0.382753000 | -3.598953000 | -1.694402000 |
| H | 0.618666000  | -3.492950000 | -1.273475000 |
| H | -0.877706000 | -4.471147000 | -1.261843000 |
| O | -3.116618000 | -3.523274000 | -2.193845000 |

**Table S28:** B3LYP /6-31G\*, SDD level optimized coordinates of **3**.

Ground state electronic energy = -1825.21952772 Hartree/Particle.

|   |              |              |              |
|---|--------------|--------------|--------------|
| H | -6.697623000 | -2.637957000 | -1.162928000 |
| H | -7.271919000 | -1.132740000 | -1.933856000 |
| H | 7.156568000  | -1.665396000 | -0.319406000 |
| C | -6.472389000 | -1.581866000 | -1.338061000 |
| H | 6.276765000  | -3.032306000 | 0.391360000  |
| H | -8.361442000 | -1.125938000 | 0.669268000  |
| H | -5.529080000 | -1.497001000 | -1.878285000 |
| H | 6.936048000  | 1.737064000  | 0.899832000  |
| C | 6.280803000  | -2.310191000 | -0.431062000 |
| H | 6.353267000  | -2.851772000 | -1.377114000 |
| O | 3.955259000  | 0.674998000  | 2.172396000  |
| C | -7.374479000 | -0.725633000 | 0.843526000  |
| N | -6.340038000 | -0.876005000 | -0.066570000 |
| O | 4.861754000  | -0.858884000 | 0.867810000  |
| C | 4.493873000  | 0.432505000  | 1.122345000  |
| H | 5.186659000  | 1.178665000  | -0.826808000 |
| C | 6.050263000  | 2.367172000  | 0.769707000  |
| C | 5.008163000  | -1.466935000 | -0.419394000 |
| H | 5.748751000  | 2.759135000  | 1.744099000  |
| H | 5.053704000  | -0.710916000 | -1.209353000 |
| H | 1.846797000  | -1.179812000 | -2.518550000 |
| C | 4.912553000  | 1.555171000  | 0.160228000  |

|    |              |              |              |
|----|--------------|--------------|--------------|
| H  | 6.308825000  | 3.198821000  | 0.108757000  |
| C  | -6.872136000 | -0.020177000 | 1.889181000  |
| C  | -5.201356000 | -0.283271000 | 0.383591000  |
| H  | -7.336800000 | 0.315834000  | 2.803458000  |
| C  | 3.764004000  | -2.301891000 | -0.781144000 |
| C  | 1.075291000  | -1.818302000 | -2.090253000 |
| Ag | -3.341539000 | -0.139784000 | -0.537942000 |
| N  | -5.544145000 | 0.240564000  | 1.591563000  |
| H  | 4.021911000  | -3.081457000 | 2.030115000  |
| H  | 0.091447000  | -1.352829000 | -2.203380000 |
| O  | 3.795464000  | 2.460685000  | -0.006311000 |
| O  | 2.600479000  | 0.743487000  | -0.822046000 |
| O  | 3.766605000  | -2.962358000 | -1.799774000 |
| H  | 1.110187000  | -2.804285000 | -2.555390000 |
| C  | 2.480376000  | -2.184379000 | -0.009191000 |
| N  | 1.307160000  | -1.953257000 | -0.639813000 |
| O  | -1.470576000 | -0.058350000 | -1.457848000 |
| H  | -1.752769000 | 1.933312000  | -3.210186000 |
| C  | 2.679211000  | 1.919693000  | -0.507851000 |
| N  | 2.228753000  | -2.233179000 | 1.319347000  |
| C  | 0.314366000  | -1.804016000 | 0.293513000  |
| C  | 3.154779000  | -2.551339000 | 2.419216000  |
| H  | -0.675237000 | -1.488269000 | -0.014946000 |
| H  | -2.512627000 | 2.473436000  | -1.699716000 |
| H  | 2.626486000  | -3.197881000 | 3.122134000  |
| C  | 0.888006000  | -1.998780000 | 1.519032000  |
| C  | -4.647944000 | 0.995931000  | 2.466510000  |
| C  | -1.552388000 | 2.273825000  | -2.189860000 |
| H  | 0.457819000  | -1.985836000 | 2.508136000  |
| C  | -0.798127000 | 1.149870000  | -1.440768000 |
| H  | 3.473747000  | -1.626370000 | 2.900395000  |
| H  | -5.029216000 | 2.012066000  | 2.603001000  |
| H  | -3.659016000 | 1.040540000  | 2.008679000  |
| H  | -4.576569000 | 0.502606000  | 3.440206000  |
| H  | 0.180105000  | 1.016195000  | -1.929661000 |
| C  | 1.507211000  | 2.905806000  | -0.632970000 |
| H  | -0.992844000 | 3.217043000  | -2.239383000 |
| H  | 2.623502000  | 4.731712000  | -0.960654000 |
| H  | 1.145362000  | 2.824384000  | -1.660835000 |
| H  | 2.170841000  | 4.446312000  | 0.734674000  |
| C  | -0.532253000 | 1.622233000  | 0.010810000  |
| C  | 1.836915000  | 4.353167000  | -0.301216000 |
| O  | 0.504795000  | 2.468607000  | 0.303359000  |
| O  | -1.237832000 | 1.303157000  | 0.943716000  |
| H  | 0.940565000  | 4.964322000  | -0.437817000 |

**Table S29.** Relative potential and free energies of first four lactide inserted products  $[2]_{\text{HF}}$ ,  $[3]_{\text{HF}}$ ,  $[4]_{\text{HF}}$  and  $[5]_{\text{HF}}$  with respect to the initiating species  $[1]_{\text{HF}}$  computed at HF/STO-3G, LANL1MB level of theory.

| entry | species                                                                                                  |                                                                                                                | relative energy ( $\Delta E$ ) | relative free energy ( $\Delta G$ ) |
|-------|----------------------------------------------------------------------------------------------------------|----------------------------------------------------------------------------------------------------------------|--------------------------------|-------------------------------------|
|       | silver-NHC species                                                                                       | free lactide                                                                                                   | (kcal/mol)                     | (kcal/mol)                          |
| 1.    | 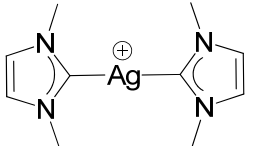<br>$[1]_{\text{HF}}$   | <br>4<br>$4LL_{\text{HF}}$  | 0.0                            | 0.0                                 |
| 2.    | <br>$[2]_{\text{HF}}$   | <br>3<br>$3LL_{\text{HF}}$  | 37.0                           | 52.8                                |
| 3.    | <br>$[3]_{\text{HF}}$  | <br>2<br>$2LL_{\text{HF}}$ | 18.6                           | 47.8                                |
| 4.    | <br>$[4]_{\text{HF}}$ | <br>1<br>$LL_{\text{HF}}$ | 11.9                           | 54.4                                |
| 5.    | <br>$[5]_{\text{HF}}$ | -                                                                                                              | -23.2                          | 31.9                                |

**Table S30:** B3LYP/6-311G(d,p), SDD level optimized coordinates of LL.

Ground state electronic energy = -534.507457794 Hartree/Particle.

Sum of electronic and thermal Free Energies= -534.402536 Hartree/Particle.

|   |              |              |              |
|---|--------------|--------------|--------------|
| 8 | -0.255376000 | 1.351363000  | -0.113295000 |
| 6 | -1.264029000 | 0.463205000  | 0.432456000  |
| 1 | -2.731190000 | 2.028102000  | 0.433319000  |
| 1 | -1.158237000 | 0.460321000  | 1.525918000  |
| 6 | -2.619183000 | 1.015867000  | 0.042944000  |
| 1 | -3.406225000 | 0.380385000  | 0.448724000  |
| 1 | -2.720238000 | 1.038970000  | -1.042847000 |
| 6 | -1.041076000 | -0.968187000 | -0.057589000 |
| 8 | -1.921154000 | -1.716717000 | -0.370719000 |
| 8 | 0.255365000  | -1.351372000 | -0.113258000 |
| 6 | 1.264028000  | -0.463204000 | 0.432450000  |
| 1 | 1.158257000  | -0.460309000 | 1.525914000  |
| 6 | 2.619181000  | -1.015865000 | 0.042930000  |
| 1 | 2.720183000  | -1.039095000 | -1.042862000 |
| 1 | 2.731253000  | -2.028046000 | 0.433427000  |
| 1 | 3.406229000  | -0.380309000 | 0.448590000  |
| 6 | 1.041082000  | 0.968183000  | -0.057593000 |
| 8 | 1.921158000  | 1.716724000  | -0.370700000 |

**Table S31:** B3LYP/6-311G(d,p), SDD level optimized coordinates of 1.

Ground state electronic energy = -756.695188893 Hartree/Particle.

Sum of electronic and thermal Free Energies= -756.486476 Hartree/Particle.

|   |              |              |              |
|---|--------------|--------------|--------------|
| 6 | -2.118139000 | 0.000035000  | -0.000036000 |
| 7 | -2.947765000 | 0.761101000  | 0.758083000  |
| 7 | -2.947819000 | -0.761042000 | -0.758083000 |
| 6 | -4.273819000 | 0.479863000  | 0.478028000  |
| 1 | -5.089374000 | 0.977768000  | 0.974038000  |
| 6 | -4.273854000 | -0.479827000 | -0.477913000 |
| 1 | -5.089443000 | -0.977729000 | -0.973870000 |
| 7 | 2.947762000  | -0.758192000 | 0.760996000  |
| 7 | 2.947821000  | 0.758119000  | -0.761002000 |
| 6 | 2.118137000  | -0.000033000 | -0.000032000 |
| 6 | 4.273818000  | -0.478048000 | 0.479852000  |
| 1 | 5.089371000  | -0.974088000 | 0.977732000  |
| 6 | 4.273856000  | 0.477981000  | -0.479749000 |
| 1 | 5.089447000  | 0.973995000  | -0.977592000 |

|    |              |              |              |
|----|--------------|--------------|--------------|
| 47 | -0.000003000 | -0.000001000 | -0.000047000 |
| 6  | -2.523801000 | -1.752291000 | -1.745633000 |
| 1  | -2.899239000 | -1.480918000 | -2.733274000 |
| 1  | -1.436548000 | -1.777291000 | -1.770078000 |
| 1  | -2.899761000 | -2.738793000 | -1.470870000 |
| 6  | -2.523673000 | 1.752287000  | 1.745670000  |
| 1  | -1.436417000 | 1.777384000  | 1.769944000  |
| 1  | -2.899769000 | 2.738778000  | 1.471059000  |
| 1  | -2.898930000 | 1.480789000  | 2.733346000  |
| 6  | 2.523819000  | 1.745792000  | -1.752132000 |
| 1  | 1.436566000  | 1.769631000  | -1.777732000 |
| 1  | 2.898556000  | 2.733554000  | -1.480217000 |
| 1  | 2.900478000  | 1.471570000  | -2.738517000 |
| 6  | 2.523672000  | -1.745747000 | 1.752209000  |
| 1  | 1.436416000  | -1.770457000 | 1.776865000  |
| 1  | 2.899434000  | -2.733319000 | 1.481040000  |
| 1  | 2.899251000  | -1.470806000 | 2.738808000  |

**Table S32:** B3LYP/6-311G(d,p), SDD level optimized coordinates of [1+LL].

Ground state electronic energy = -1291.20949013 Hartree/Particle.

Sum of electronic and thermal Free Energies= -1290.880187 Hartree/Particle.

|   |              |              |              |
|---|--------------|--------------|--------------|
| 8 | -3.139803000 | -0.954101000 | -0.479014000 |
| 6 | -4.504175000 | -1.185665000 | -0.942566000 |
| 6 | -5.395810000 | 0.051494000  | -0.944227000 |
| 8 | -4.991205000 | 1.130951000  | -0.240294000 |
| 6 | -3.935109000 | 1.030659000  | 0.734609000  |
| 6 | -2.840895000 | 0.042053000  | 0.360471000  |
| 8 | -6.409105000 | 0.070614000  | -1.577642000 |
| 8 | -1.722721000 | 0.144269000  | 0.807154000  |
| 6 | -5.130077000 | -2.350865000 | -0.183285000 |
| 1 | -4.381688000 | -1.458232000 | -1.990775000 |
| 1 | -6.109946000 | -2.568399000 | -0.610314000 |
| 1 | -5.256444000 | -2.124010000 | 0.877166000  |
| 1 | -4.499091000 | -3.235468000 | -0.279167000 |
| 6 | -4.506108000 | 0.754621000  | 2.126188000  |
| 1 | -4.982231000 | -0.226286000 | 2.179910000  |
| 1 | -5.253380000 | 1.513432000  | 2.360906000  |
| 1 | -3.709959000 | 0.796693000  | 2.871342000  |
| 1 | -3.464820000 | 2.013867000  | 0.725617000  |
| 6 | 2.371120000  | -2.023660000 | 0.072885000  |
| 7 | 1.406278000  | -2.969709000 | -0.043992000 |
| 7 | 3.522750000  | -2.725541000 | 0.232321000  |

|    |              |              |              |
|----|--------------|--------------|--------------|
| 6  | 1.946405000  | -4.241269000 | 0.034816000  |
| 1  | 1.345058000  | -5.131303000 | -0.035943000 |
| 6  | 3.280871000  | -4.088277000 | 0.211235000  |
| 1  | 4.063429000  | -4.818164000 | 0.328735000  |
| 7  | 1.280454000  | 2.971905000  | 0.798265000  |
| 7  | 2.448153000  | 3.050340000  | -1.002341000 |
| 6  | 1.936909000  | 2.184977000  | -0.090506000 |
| 6  | 1.384179000  | 4.306857000  | 0.450379000  |
| 1  | 0.933789000  | 5.093843000  | 1.030350000  |
| 6  | 2.118997000  | 4.357526000  | -0.687078000 |
| 1  | 2.426754000  | 5.194973000  | -1.289313000 |
| 47 | 2.132373000  | 0.078815000  | -0.013000000 |
| 6  | 4.850267000  | -2.143606000 | 0.417151000  |
| 1  | 5.510179000  | -2.446476000 | -0.397305000 |
| 1  | 4.756889000  | -1.059854000 | 0.420945000  |
| 1  | 5.272836000  | -2.469815000 | 1.368595000  |
| 6  | -0.014694000 | -2.701540000 | -0.271248000 |
| 1  | -0.255503000 | -1.691362000 | 0.052030000  |
| 1  | -0.257008000 | -2.813902000 | -1.329609000 |
| 1  | -0.608414000 | -3.406047000 | 0.311388000  |
| 6  | 3.237942000  | 2.676585000  | -2.173760000 |
| 1  | 3.341340000  | 1.593939000  | -2.192216000 |
| 1  | 2.734916000  | 3.004243000  | -3.084740000 |
| 1  | 4.227389000  | 3.133254000  | -2.120279000 |
| 6  | 0.575908000  | 2.477405000  | 1.984664000  |
| 1  | -0.101257000 | 1.671574000  | 1.703978000  |
| 1  | 1.291247000  | 2.125325000  | 2.729068000  |
| 1  | -0.000751000 | 3.297248000  | 2.410840000  |



---

[1]. Gaussian 03, Revision C.02, M. J. Frisch, G. W. Trucks, H. B. Schlegel, G. E. Scuseria, M. A. Robb, J. R. Cheeseman, J. A. Montgomery, Jr., T. Vreven, K. N. Kudin, J. C. Burant, J. M. Millam, S. S. Iyengar, J. Tomasi, V. Barone, B. Mennucci, M. Cossi, G. Scalmani, N. Rega, G. A. Petersson, H. Nakatsuji, M. Hada, M. Ehara, K. Toyota, R. Fukuda, J. Hasegawa, M. Ishida, T. Nakajima, Y. Honda, O. Kitao, H. Nakai, M. Klene, X. Li, J. E. Knox, H. P. Hratchian, J. B. Cross, C. Adamo, J. Jaramillo, R. Gomperts, R. E. Stratmann, O. Yazyev, A. J. Austin, R. Cammi, C. Pomelli, J. W. Ochterski, P. Y. Ayala, K. Morokuma, G. A. Voth, P. Salvador, J. J. Dannenberg, V. G. Zakrzewski, S. Dapprich, A. D. Daniels, M. C. Strain, O. Farkas, D. K. Malick, A. D. Rabuck, K. Raghavachari, J. B. Foresman, J. V. Ortiz, Q. Cui, A. G. Baboul, S. Clifford, J. Cioslowski, B. B. Stefanov, G. Liu, A. Liashenko, P. Piskorz, I. Komaromi, R. L. Martin, D. J. Fox, T. Keith, M. A. Al-Laham, C. Y. Peng, A. Nanayakkara, M. Challacombe, P. M. W. Gill, B. Johnson, W. Chen, M. W. Wong, C. Gonzalez, J. A. Pople, Gaussian, Inc., Wallingford CT, 2004.
